# Supplementary material for: Molecular mechanisms of the antiangiogenic and antitumor effects of mycophenolic acid
Source: Oxford University Press journal article supplement (doi:10.1158/1535-7163.mct-08-0193), 2008-06-01
Supplement: 15357163mct080193-sup-mct-08-0193--suppl_table_1.pdf [file 15357163mct080193-sup-mct-08-0193--suppl_table_1.pdf]

|                 |           |                                                                    |              |        |       |       |       |
|-----------------|-----------|--------------------------------------------------------------------|--------------|--------|-------|-------|-------|
| IMAGp998E211117 | GARS      | glycyl-tRNA synthetase                                             | NM_002047    | 2617   | -1.79 | -1.19 | -     |
| 2.05            | -1.42     | -1.81                                                              | -2.17        | -0.41  | 0     | -0.71 | -0.6  |
|                 | 0.31      | -0.47                                                              | -0.1         | -0.14  | 0.77  |       |       |
|                 | 1.14      | 0.4                                                                | 0.75         |        |       |       |       |
| IMAGp998E20194  | GCLM      | glutamate-cysteine ligase, modifier subunit                        | NM_002061    | 2730   | -0.83 | -1.01 | -0.91 |
|                 | -1.44     | -1.17                                                              | -1.11        | -0.03  | -0.37 | -0.26 | -     |
| 0.09            | 0.09      | 0.18                                                               | 0.01         | -0.09  | 0.57  | 0.34  | 0.2   |
|                 | 0.35      |                                                                    |              |        |       |       |       |
| IMAGp998J051786 | GNB4      | guanine nucleotide binding protein (G protein), beta polypeptide 4 | NM_021629    | 59345  | 0.21  | 0.27  | 0.01  |
|                 | 0.52      | 0.76                                                               | 0.09         | -0.23  | -0.3  | -0.54 |       |
| 0.15            | -0.18     | 0.45                                                               | 0.17         | -0.05  | -0.2  | -0.23 | -0.49 |
|                 | -0.23     | -0.23                                                              | -0.3         | -0.54  |       |       |       |
| IMAGp998F241862 | GOSR1     | golgi SNAP receptor complex member 1                               | NM_001007025 |        |       |       |       |
|                 | 9527      | 0.47                                                               | 0.86         | 0.4    | 0.82  | 0.13  | 0.11  |
|                 | 0.31      | 0.24                                                               | 0.02         | 0.29   | 0.99  |       |       |
| 0.47            | -0.15     | -0.01                                                              | 0.07         | 0.01   | 0     | -0.03 |       |
| IMAGp998F18976  | GPC6      | glypican 6                                                         |              | 10082  | 0.4   | 0.56  | 0.31  |
|                 | 1.01      | 1.12                                                               |              |        |       |       |       |
| 0.77            | -0.11     | 0.48                                                               | -0.05        | 0.37   | 0.23  | 0.14  | -0.22 |
|                 | 0.09      | -0.62                                                              | -0.44        | -0.2   | -     |       |       |
| 0.28            |           |                                                                    |              |        |       |       |       |
| IMAGp998O04462  | GTPBP4    | GTP binding protein 4                                              | NM_012341    | 23560  | -0.8  | -     |       |
|                 | 0.66      | -0.5                                                               | -0.94        | -0.15  | -1.22 | -0.16 | -0.77 |
|                 | -0.58     | -1.32                                                              | -0.24        | -0.55  | 0.17  | -0.05 |       |
|                 | 1.41      | 0.87                                                               | 0.3          | 0.59   |       |       |       |
| IMAGp998P012577 | HIST1H2BA | histone 1, H2ba                                                    | NM_170610    | 255626 |       | 0.07  |       |
|                 | 0.6       | -0.04                                                              | 0.73         | 0.59   | 0.68  | -0.29 | 0.24  |
|                 | 0.78      | 0.28                                                               | 0.34         | 0.18   | -0.22 | -     |       |
| 0.2             | -0.25     | -0.11                                                              | 0            | -0.52  |       |       |       |
| IMAGp998B144117 | HNRPLL    | heterogeneous nuclear ribonucleoprotein L-like                     |              |        |       |       |       |
|                 | 92906     | -0.05                                                              | 0.57         | 0.38   | 0.8   | -0.16 | 0.64  |
|                 | 0.02      | -0.14                                                              | 0.07         | 0.24   | 0.66  |       |       |
|                 | 0.45      | -0.16                                                              | -0.08        | -0.67  | -0.51 | -0.2  | -0.29 |
| IMAGp998C131008 | HSMPP8    | M-phase phosphoprotein, mpp8                                       |              | 54737  | 0.03  |       |       |
|                 | 0.59      | 0.11                                                               | 0.62         | 0.63   | 0.23  | -0.08 | 0.04  |
|                 | 0.1       | 0.28                                                               | -0.05        | 0.4    | -0.1  | -     |       |
| 0.23            | -0.29     | -0.07                                                              | 0            | -0.34  |       |       |       |
| IMAGp998K17615  | HSPA9B    | heat shock 70kDa protein 9B (mortalin-2)                           |              |        |       |       |       |
|                 | NM_004134 | 3313                                                               | -0.87        | -0.8   | -0.96 | -0.97 | -0.75 |
|                 | 0.06      | -0.12                                                              | -0.41        | -0.86  | -     |       |       |
| 0.58            | -0.92     | -0.47                                                              | 0.1          | -0.12  | 1.52  | 1.24  | 0.6   |
|                 | 0.99      |                                                                    |              |        |       |       |       |
| IMAGp998G04114  | HSPC111   | hypothetical protein HSPC111                                       | NM_016391    | 51491  | -     |       |       |
|                 | 1.32      | -0.45                                                              | -1.17        | -0.31  | -0.32 | -0.05 | -1.4  |
|                 | -0.86     | -1.86                                                              | -1.42        | -2.02  | -1.96 | 0.13  | -     |
| 0.57            | 0.43      | 0.57                                                               | 0.4          | -0.22  |       |       |       |
| IMAGp998O16868  | HSPD1     | heat shock 60kDa protein 1 (chaperonin)                            | NM_199440    |        |       |       |       |
|                 | 3329      | -0.48                                                              | -1.2         | -0.9   | -1.36 | -0.58 | -0.31 |
|                 | -0.02     | -0.14                                                              | -0.6         | -0.94  | -1.13 | -     |       |
| 0.44            | 0.13      | -0.15                                                              | 1            | 0.88   | 0.3   | 0.24  |       |
| IMAGp998L222014 | HSPH1     | heat shock 105kDa/110kDa protein 1                                 | NM_006644    | 10808  | -     |       |       |
|                 | 0.88      | -1.24                                                              | -1.04        | -1.28  | -1.25 | -1.73 | -0.32 |
|                 | -0.26     | -0.7                                                               | -0.28        | -0.09  | 0.12  | -0.25 |       |
|                 | 0.27      | 0.94                                                               | 0.73         | 0.1    | 0.67  |       |       |
| IMAGp998P191938 | HSU79274  | protein predicted by clone 23733                                   | NM_013300    |        |       |       |       |
|                 | 29902     | -0.94                                                              | -0.8         | -0.99  | -1.2  | -1.04 | -0.82 |
|                 | -0.53     | -0.61                                                              | -0.46        | -0.3   | -0.92 |       |       |
|                 | 0.01      | 0.05                                                               | -0.15        | 0.77   | 0.51  | 0     | 1     |
| IMAGp998H23652  | KIAA0355  | KIAA0355                                                           | NM_014686    | 9710   | 0.5   | 0.23  | 0.47  |
|                 | 0.45      | 0.53                                                               | 1.11         | 0.32   | 0.57  | 0.15  | 0.18  |
|                 | 0.34      | 0.55                                                               | -0.39        | -0.15  | -0.29 | -     |       |
| 0.09            | -0.1      | -0.31                                                              |              |        |       |       |       |
| IMAGp998F072040 | KIF11     | kinesin family member 11                                           | NM_004523    | 3832   | -0.02 | -     |       |
|                 | 0.62      | -1.17                                                              | -1.27        | -1.01  | -1.34 | -0.44 | -0.66 |
|                 | -0.2      | -0.67                                                              | -0.74        | 0.57   | -0.11 | 0.2   |       |
|                 | 0.87      | 0.5                                                                | 0.4          | 0.8    |       |       |       |
| IMAGp998B192011 | KLF9      | Kruppel-like factor 9                                              | NM_001206    | 687    | -0.24 | -0.49 | -     |
|                 | 0.42      | -0.54                                                              | -0.17        | -0.29  | 0.09  | -0.15 | -0.14 |
|                 | -0.56     | 0.24                                                               | 0.16         | 0.06   | 0.22  | 0.66  |       |
|                 | 0.4       | 0.4                                                                | 0.59         |        |       |       |       |
| IMAGp998M1818   | KPNA2     | karyopherin alpha 2 (RAG cohort 1, importin alpha 1)               |              |        |       |       |       |
|                 | NM_002266 | 3838                                                               | -0.35        | -0.53  | -1.14 | -1.25 | -1.03 |
|                 | -1.1      | -0.19                                                              | -0.42        | -1.18  | -     |       |       |
| 0.2             | -0.97     | -0.31                                                              | 0.64         | -0.37  | 2.24  | 1.97  | 0.8   |
|                 | 2.11      |                                                                    |              |        |       |       |       |
| IMAGp998E191786 | LDHC      | lactate dehydrogenase C                                            |              | 3948   | -0.15 | 0.75  | -0.05 |
|                 | 0.61      | 0.56                                                               | 0.49         | -0.31  | 0.28  | -0.42 | 0.09  |
|                 | 0.68      | 0.05                                                               | -0.41        | -0.25  | -0.44 | -     |       |
| 0.2             | -0.6      | -0.46                                                              |              |        |       |       |       |

|                                                       |           |                                                |           |        |       |       |
|-------------------------------------------------------|-----------|------------------------------------------------|-----------|--------|-------|-------|
| IMAGp998A19123                                        | LNK       | lymphocyte adaptor protein                     | NM_005475 | 10019  | -0.39 | -     |
| 0.69                                                  | -0.43     | -0.73                                          | -0.36     | -0.1   | -0.13 | -0.36 |
|                                                       | 1.6       | 1.15                                           | 0.7       | 1.04   |       |       |
| IMAGp998I171779                                       | LOC115294 | similar to hypothetical protein FLJ10883       |           |        |       |       |
|                                                       | NM_052937 | 115294                                         | -0.06     | 0.54   | -0.03 | 0.71  |
|                                                       | 1.08      | 0.91                                           | 1.62      | 1.15   | -0.25 | -0.05 |
| IMAGp998O06929                                        | LOC285556 | hypothetical protein LOC285556                 |           |        |       |       |
|                                                       | 285556    |                                                | -0.8      | -2.04  | -1.19 | -1.84 |
| 0.49                                                  | -0.85     | 0.04                                           | 0.11      | 1.44   | 1.27  | 0.2   |
| IMAGp998F17116                                        | LOC388214 | hypothetical LOC388214                         |           |        |       |       |
|                                                       |           |                                                | 0.63      | 0.36   | 0.05  | -0.13 |
| 0.17                                                  | -0.41     | -0.15                                          | -0.4      | -0.44  | 0.06  | -0.16 |
| IMAGp998N211962                                       | LOC389730 | similar to chromosome 9 open reading frame 36  |           |        |       |       |
|                                                       | XM_372094 | 389730                                         | 0.33      | 0.34   | -0.27 | 0.48  |
|                                                       | 0.99      | 0.03                                           | -0.1      | 0.4    | -0.22 | -0.37 |
| IMAGp998I191963                                       | MELK      | maternal embryonic leucine zipper kinase       | NM_014791 |        |       |       |
|                                                       | 9833      |                                                | -0.02     | -0.75  | -0.79 | -0.74 |
|                                                       | 0.25      | 0.32                                           | 0.22      | 1.08   | 0.49  | 0.4   |
| IMAGp998L09196                                        | MGC10744  | hypothetical protein MGC10744                  | NM_183065 | 84314  |       |       |
|                                                       |           |                                                | 0.04      | 0.24   | -0.09 | 0.32  |
| 0.11                                                  | -0.23     | -0.24                                          | -0.15     | -0.6   | -0.34 |       |
| IMAGp998C07136                                        | MGC15912  | hypothetical protein MGC15912                  | NM_032886 | 84972  |       |       |
|                                                       |           |                                                | 0.09      | 0.3    | 0.07  | 0.56  |
| 0.15                                                  | 0         | -0.46                                          | -0.18     | -0.2   | -0.33 |       |
| IMAGp998B06642                                        | MGC40214  | hypothetical protein MGC40214                  |           | 137682 |       |       |
|                                                       |           |                                                | 0.12      | 0.07   | 0.09  | 0.59  |
| 0.21                                                  | -0.32     | -0.63                                          | -0.39     | -1.8   | -0.44 |       |
| IMAGp998A216113                                       | MGC42367  | similar to 2010300C02Rik protein               | NM_207362 |        |       |       |
|                                                       | 343990    |                                                | -1.63     | -0.29  | -1.83 | -0.35 |
|                                                       | 0.03      | -0.35                                          | -0.01     | 0.11   | 0.35  | 0.4   |
| IMAGp998O03131                                        | MKI67IP   | MKI67 (FHA domain) interacting nucleolar       |           |        |       |       |
| phosphoprotein                                        | NM_032390 | 84365                                          | -1.13     | -0.95  | -0.96 | -0.82 |
| 0.6                                                   | -1.12     | -0.52                                          | -0.84     | -0.44  | 0.06  | -0.23 |
| IMAGp998A09421                                        | MRPL36    | mitochondrial ribosomal protein L36            | NM_032479 |        |       |       |
|                                                       | 64979     |                                                | -0.38     | -0.36  | -0.05 | -0.6  |
| 0.92                                                  | 0.12      | 0.15                                           | 0.5       | 0.13   | 0.2   | 0.33  |
| IMAGp998E111206                                       | MRPS9     | mitochondrial ribosomal protein S9             |           | 64965  | -1.13 | -     |
| 0.32                                                  | -0.95     | -0.45                                          | -0.97     | 0.39   | -0.22 | -0.4  |
|                                                       | 0.25      | -0.02                                          | 0.3       | 0.16   | 0.29  | -0.6  |
| IMAGp998O07415                                        | MTHFD1L   | methylenetetrahydrofolate dehydrogenase (NADP+ |           |        |       |       |
| dependent) 1-like                                     | NM_015440 | 25902                                          | -0.54     | -0.61  | -0.78 | -1    |
| 0.4                                                   | -0.75     | -0.6                                           | -0.62     | 0.03   | -0.09 | 0.02  |
| IMAGp998J03598                                        | MTHFD2    | methylenetetrahydrofolate dehydrogenase (NADP+ |           |        |       |       |
| dependent) 2, methenyltetrahydrofolate cyclohydrolase | NM_006636 | 10797                                          | -1.14     | -      |       |       |
| 1.17                                                  | -0.97     | -1.67                                          | -0.99     | -0.98  | 0     | -0.95 |
|                                                       | 0.9       | 0.4                                            | -0.2      | 0.6    | 0     | -0.25 |
| IMAGp998P234167                                       | NCBP2     | nuclear cap binding protein subunit 2, 20kDa   |           |        |       |       |
|                                                       | NM_007362 | 22916                                          | -1.24     | 0.11   | -1.01 | -0.25 |
| 1.14                                                  | -0.17     | -0.19                                          | 0.13      | 0.15   | 0.89  | 0.66  |
| IMAGp998F084789                                       | NCL       | nucleolin                                      | NM_005381 | 4691   | -0.5  | -0.75 |
|                                                       |           |                                                | 0.26      | -0.55  | 0.49  | -0.94 |
|                                                       | 1.3       | 1.07                                           | 0.49      | -0.94  | 0.28  | -0.65 |
| IMAGp998E08645                                        | NEBL      | nebullette                                     | NM_006393 | 10529  | -0.8  | -0.5  |
| 0.89                                                  | -1.83     | -0.04                                          | -0.44     | -0.13  | -0.7  | -0.06 |
|                                                       | 0.85      |                                                |           |        |       | -0.07 |



|                 |         |                                                                                                         |           |        |       |       |       |       |       |       |       |       |
|-----------------|---------|---------------------------------------------------------------------------------------------------------|-----------|--------|-------|-------|-------|-------|-------|-------|-------|-------|
| IMAGp998B131156 | PSME3   | "proteasome (prosome, macropain) activator subunit 3 (PA28 gamma; Ki)"                                  | NM_005789 | 10197  | -0.2  | -0.45 | -0.98 | -0.67 | -0.51 | -0.54 | -0.39 | -     |
|                 |         |                                                                                                         |           |        | 0.6   | -0.73 | -0.8  | -0.98 | -0.16 | 0.07  | -0.28 | 0.7   |
|                 |         |                                                                                                         |           |        |       |       |       |       |       | 0.48  | 0.3   | 0.57  |
| IMAGp998P07460  | PTDSR   | phosphatidylserine receptor                                                                             |           | 23210  | -0.13 | -0.52 | -     |       |       |       |       |       |
|                 |         |                                                                                                         |           |        | 0.98  | 0.01  | -0.05 | -0.3  | -1    | -0.36 | -0.86 | -0.56 |
|                 |         |                                                                                                         |           |        |       |       |       |       |       | -1.19 | -0.22 | -0.12 |
|                 |         |                                                                                                         |           |        |       | 0.23  | 0.4   | 0.67  |       |       |       |       |
| IMAGp998I04794  | PYGM    | "phosphorylase, glycogen; muscle (McArdle syndrome, glycogen storage disease type V)"                   |           | 5837   | 0.39  | -0.1  | -0.06 | 0.01  | -0.19 | -     |       |       |
|                 |         |                                                                                                         |           |        | 0.26  | -0.13 | -0.24 | 0.07  | -0.17 | 0.21  | 0.2   | 0.3   |
|                 |         |                                                                                                         |           |        |       |       |       |       |       | 0.6   | 0.82  | 0.57  |
|                 |         |                                                                                                         |           |        |       |       |       |       |       | 0.2   | 0.62  |       |
| IMAGp998J17646  | RAB18   | RAB18, member RAS oncogene family                                                                       | NM_021252 | 22931  | -     |       |       |       |       |       |       |       |
|                 |         |                                                                                                         |           |        | 0.38  | -0.46 | -0.53 | -0.58 | -0.47 | -0.4  | 0.25  | -0.21 |
|                 |         |                                                                                                         |           |        |       |       |       |       |       | -0.22 | -0.63 | -0.38 |
|                 |         |                                                                                                         |           |        |       | 0.13  | 1.52  | 0.76  | 0.8   | 0.79  |       | 0.14  |
| IMAGp998E16403  | RBMS1   | RNA binding motif, single stranded interacting protein 1                                                |           | 5937   | -0.55 | -0.67 | -0.46 | -0.96 | -0.01 | -1.22 | 0.08  | -0.6  |
|                 |         |                                                                                                         |           |        | 1.01  | -0.21 | -0.13 | 0.28  | 1.15  | 0.69  | 0.8   | 0.84  |
|                 |         |                                                                                                         |           |        |       |       |       |       |       |       |       |       |
| IMAGp998A23474  | RG9MTD1 | RNA (guanine-9-) methyltransferase domain containing 1                                                  | NM_017819 | 54931  | -0.98 | -0.59 | -0.67 | 0.54  | 0.07  | -1.76 | -1.35 | -     |
|                 |         |                                                                                                         |           |        | 0.87  | -0.06 | -1.2  | 0.15  | -0.34 | 0.22  | 0.01  | 0.77  |
|                 |         |                                                                                                         |           |        |       |       |       |       |       | 0.89  | 0.6   | 0.95  |
| IMAGp998G05131  | RHOU    | ras homolog gene family, member U                                                                       | NM_021205 | 58480  | -     |       |       |       |       |       |       |       |
|                 |         |                                                                                                         |           |        | 0.19  | 0.59  | -0.25 | 0.79  | 0.24  | -0.11 | 0.03  | 0.16  |
|                 |         |                                                                                                         |           |        |       |       |       |       |       | -0.07 | 0.39  | 0.77  |
|                 |         |                                                                                                         |           |        |       | 0.53  | -0.62 | -0.14 | -0.2  | -0.46 |       | -0.27 |
| IMAGp998H17736  | RNPS1   | RNA binding protein S1, serine-rich domain                                                              |           | 10921  | -0.61 | -0.47 | -0.37 | -0.96 | -0.68 | -0.82 | -0.16 | -0.6  |
|                 |         |                                                                                                         |           |        | 0.51  | -0.06 | 0.24  | 0.4   | -0.2  | 0     | 0.59  | -0.23 |
|                 |         |                                                                                                         |           |        |       |       |       |       |       |       |       | -0.43 |
|                 |         |                                                                                                         |           |        |       |       |       |       |       |       |       | -0.45 |
| IMAGp998A132000 | RNU22   | RNA, U22 small nucleolar                                                                                |           | 9304   | -0.83 | -1.28 | -     |       |       |       |       |       |
|                 |         |                                                                                                         |           |        | 0.75  | -1.17 | -0.59 | -0.72 | -0.33 | -0.83 | -0.81 | -1.24 |
|                 |         |                                                                                                         |           |        |       |       |       |       |       | -0.57 | -0.41 | 0.18  |
|                 |         |                                                                                                         |           |        |       | 0.87  | 1.1   | 0.2   |       |       |       | 0.01  |
|                 |         |                                                                                                         |           |        |       |       |       |       |       |       |       | 1.47  |
| IMAGp998L20315  | RPL11   | ribosomal protein L11                                                                                   | NM_000975 | 6135   | -0.34 | -0.17 | -     |       |       |       |       |       |
|                 |         |                                                                                                         |           |        | 0.72  | -0.56 | -0.7  | -0.22 | 0.09  | -0.27 | -0.52 | -0.45 |
|                 |         |                                                                                                         |           |        |       |       |       |       |       | -0.77 | -0.3  | 0.17  |
|                 |         |                                                                                                         |           |        |       | 0.86  | 0.4   | 0.38  |       |       |       | -0.11 |
|                 |         |                                                                                                         |           |        |       |       |       |       |       |       |       | 1.01  |
| IMAGp998K1799   | RPL24   | ribosomal protein L24                                                                                   |           | 6152   | -0.56 | -2.22 | -0.82 | -     |       |       |       |       |
|                 |         |                                                                                                         |           |        | 2.04  | -1.22 | -0.19 | 0.58  | -0.33 | -0.29 | -1.12 | -0.83 |
|                 |         |                                                                                                         |           |        |       |       |       |       |       | -0.83 | 0.22  | 0.43  |
|                 |         |                                                                                                         |           |        |       | 0.6   | 0.28  |       |       |       |       | 1.45  |
|                 |         |                                                                                                         |           |        |       |       |       |       |       |       |       | 0.65  |
| IMAGp998P151197 | SAP30   | sin3-associated polypeptide, 30kDa                                                                      | NM_003864 | 8819   | -     |       |       |       |       |       |       |       |
|                 |         |                                                                                                         |           |        | 0.13  | -0.27 | -0.66 | -0.72 | -0.49 | -0.38 | -0.38 | -1.01 |
|                 |         |                                                                                                         |           |        |       |       |       |       |       | -0.44 | -0.07 | -0.83 |
|                 |         |                                                                                                         |           |        |       | 0.09  | 0.54  | -0.06 | 0.5   | 0.17  |       | -0.11 |
|                 |         |                                                                                                         |           |        |       |       |       |       |       |       |       | 0.14  |
| IMAGp998O0894   | SASH1   | SAM and SH3 domain containing 1                                                                         |           | 23328  | 0.21  |       |       |       |       |       |       |       |
|                 |         |                                                                                                         |           |        | 0.27  | 0.36  | 0.31  | 1.37  | 0.93  | -0.26 | 0.18  | 0.13  |
|                 |         |                                                                                                         |           |        |       |       |       |       |       | 0.36  | 0.29  | 0.62  |
|                 |         |                                                                                                         |           |        |       | 0.17  | -0.58 | -0.56 | -0.9  | -1.05 |       | -0.32 |
| IMAGp998L064578 | SFRS2   | splicing factor, arginine/serine-rich 2                                                                 | NM_003016 |        |       |       |       |       |       |       |       |       |
|                 |         |                                                                                                         |           |        | 6427  | -0.88 | 0.04  | -0.81 | -0.49 | -0.54 | -0.04 | 0.1   |
|                 |         |                                                                                                         |           |        |       |       |       |       |       | -0.4  | -1.02 | -0.16 |
|                 |         |                                                                                                         |           |        |       | 0.26  | 0.13  | 0.17  | 0.91  | 0.45  | 0.3   | 0.19  |
| IMAGp998L20645  | SFRS6   | splicing factor, arginine/serine-rich 6                                                                 | NM_006275 |        |       |       |       |       |       |       |       |       |
|                 |         |                                                                                                         |           |        | 6431  | -0.26 | -0.66 | -0.25 | -0.85 | -0.64 | -0.84 | -0.13 |
|                 |         |                                                                                                         |           |        |       |       |       |       |       | -0.75 | -0.91 | -0.89 |
|                 |         |                                                                                                         |           |        |       | 0.78  | 0.16  | 0.28  | 0.83  | 0.28  | 0.1   | 0.29  |
| IMAGp998L042012 | SGOL2   | shugoshin-like 2 (S. pombe)                                                                             | NM_152524 | 151246 | -     |       |       |       |       |       |       |       |
|                 |         |                                                                                                         |           |        | 0.62  | -0.62 | -1.31 | -1.18 | -1.06 | -1.06 | -0.31 | -0.57 |
|                 |         |                                                                                                         |           |        |       |       |       |       |       | -0.64 | -0.67 | -0.88 |
|                 |         |                                                                                                         |           |        |       | 0.3   | 1.47  | 1.28  | 2.3   | 1.25  |       | -0.05 |
|                 |         |                                                                                                         |           |        |       |       |       |       |       |       |       | 0.19  |
| IMAGp998P192044 | SLC1A1  | solute carrier family 1 (neuronal/epithelial high affinity glutamate transporter, system Xag), member 7 | NM_004170 | 6505   | 0.29  | 1     |       |       |       |       |       |       |
|                 |         |                                                                                                         |           |        | 0.32  | 0.94  | 0.26  | 0.39  | 0.22  | 0.25  | -0.09 | 0.44  |
|                 |         |                                                                                                         |           |        |       |       |       |       |       | 0.47  | 0.66  | -0.25 |
|                 |         |                                                                                                         |           |        |       | 0.05  | 0.02  | 0     | 0.05  |       |       | 0.09  |
|                 |         |                                                                                                         |           |        |       |       |       |       |       |       |       | -     |
| IMAGp998G01214  | SLC30A7 | solute carrier family 30 (zinc transporter), member 7                                                   |           | 148867 | -0.74 | -0.55 | -0.59 | -0.69 | -0.67 | -1.13 | 0.1   | -0.18 |
|                 |         |                                                                                                         |           |        | 0.34  | -0.61 | 0.08  | -0.25 | -0.23 | 0.31  | 0.84  | 0.42  |
|                 |         |                                                                                                         |           |        |       |       |       |       |       | 0.3   | 0.52  |       |

|                 |          |                                                                                |           |       |       |       |       |       |       |       |       |       |       |       |       |       |       |       |      |       |       |       |
|-----------------|----------|--------------------------------------------------------------------------------|-----------|-------|-------|-------|-------|-------|-------|-------|-------|-------|-------|-------|-------|-------|-------|-------|------|-------|-------|-------|
| IMAGp998C152458 | SLC39A14 | solute carrier family 39 (zinc transporter), member 14                         | NM_015359 | 23516 | -0.7  | -0.34 | -0.65 | -0.81 | -0.41 | -0.12 | -0.33 | -0.61 | -0.94 | -0.57 | -0.87 | -1.1  | -0.24 | 0.28  | 0.66 | 0.29  | 0     | 0.09  |
| IMAGp998K06283  | SLC39A14 | solute carrier family 39 (zinc transporter), member 14                         | NM_015359 | 23516 | -1.37 | 0.15  | -1.33 | 0.48  | -0.01 | -1.99 | -0.43 | -0.6  | -1.06 | -0.31 | -1.04 | -0.6  | -0.17 | 0.34  | 0.73 | 0.64  | 1.2   | 0.38  |
| IMAGp998A10586  | SLC7A1   | solute carrier family 7 (cationic amino acid transporter, y+ system), member 1 | NM_003045 | 6541  | -0.65 | -0.58 | -0.53 | -1.04 | -0.8  | -0.32 | -0.03 | -0.63 | -0.76 | -0.65 | -1.11 | -0.46 | -0.21 | -0.09 | 0.8  | 0.23  | 0.4   | 0.25  |
| IMAGp998J154512 | SMN1     | survival of motor neuron 1, telomeric                                          | NM_000344 | 6606  | -0.77 | 0.02  | -0.78 | -0.28 | -0.23 | -0.29 | 0.03  | -0.48 | -0.38 | -0.75 | 0.31  | 0.55  | 0.89  | 0.26  | 1.41 | 0.78  | 0.4   | 0.78  |
| IMAGp998D034747 | SNRPA1   | small nuclear ribonucleoprotein polypeptide A'                                 |           | 6627  | -1.58 | -0.38 | -1.95 | 0.42  | -1.1  | -2.53 | -0.37 | -0.11 | -0.38 | -0.7  | -0.47 | 0.14  | 0.21  | 0.01  | 0.47 | 0.67  | 1.3   | 1.08  |
| IMAGp998G08826  | STK17A   | serine/threonine kinase 17a (apoptosis-inducing)                               |           | 9263  | -0.75 | -0.35 | -0.51 | -0.21 | -0.35 | -0.45 | -0.3  | -0.13 | -0.52 | -0.42 | 0.39  | 0.21  | 0.14  | -0.2  | 0.88 | 0.98  | 0.7   | 0.88  |
| IMAGp998A132001 | TDP1     | tyrosyl-DNA phosphodiesterase 1                                                |           | 55775 | -0.61 | -0.1  | -0.87 | -0.47 | -0.57 | -0.62 | -0.25 | -0.61 | 0.76  | -0.71 | -0.58 | -0.51 | 0.18  | -0.03 | 0.27 | 0.21  | 0.4   | 0.27  |
| IMAGp998K18564  | TOP2A    | topoisomerase (DNA) II alpha 170kDa                                            | NM_001067 | 7153  | -0.52 | -0.88 | -1.29 | -0.99 | -0.77 | -0.22 | -0.65 | -0.12 | -0.49 | -0.14 | -0.06 | 0.45  | 0.31  | 1.58  | 0.9  | 1.3   | 1.13  |       |
| IMAGp998B06823  | TRAM2    | translocation associated membrane protein 2                                    | NM_012288 | 9697  | -0.67 | -0.67 | -0.6  | -1.14 | -0.97 | -1.35 | -0.07 | -0.58 | -0.61 | 0.89  | -0.42 | -0.33 | 0.05  | -0.1  | 0.87 | 0.53  | 0.4   | 1.42  |
| IMAGp998G10605  | TRIP13   | thyroid hormone receptor interactor 13                                         | NM_004237 | 9319  | -0.28 | -0.33 | -1.03 | -1.13 | -0.97 | -0.9  | 0.25  | -0.03 | -0.45 | 0.3   | -0.2  | -0.21 | 0.11  | 0.06  | 0.73 | 0.34  | 0     | 0.6   |
| IMAGp998C083938 | TXNIP    | thioredoxin interacting protein                                                | NM_006472 | 10628 | 0.57  | 1.54  | 0.78  | 1.15  | 0.52  | 1.87  | 1.5   | 1.27  | 0.88  | 0.53  | 1.05  | 0.67  | 0.21  | 0.37  | 0.1  | -0.23 | -0.6  | -1.27 |
| IMAGp998F083938 | TXNIP    | thioredoxin interacting protein                                                | NM_006472 | 10628 | 0.51  | 1.41  | 0.61  | 0.98  | 1.39  | 0.6   | 1.26  | 1.25  | 0.87  | 0.79  | 1.2   | 1.18  | 0.29  | 0.31  | 0.05 | -0.11 | -1.2  | -0.71 |
| IMAGp998E15659  | UBE2C    | ubiquitin-conjugating enzyme E2C                                               | NM_007019 | 11065 | 0.25  | -0.42 | -0.38 | -1.27 | -0.92 | -1    | -0.25 | -1.42 | -0.51 | -1.14 | -0.03 | -1.01 | 0.64  | 0.14  | 2.02 | 0.95  | 0.9   | 1.38  |
| IMAGp998I054902 | UBE2S    | ubiquitin-conjugating enzyme E2S                                               | NM_014501 | 27338 | 0.67  | 0.48  | -1.88 | 0.69  | -0.68 | -1.55 | -0.49 | -0.53 | -0.87 | 0.04  | -0.81 | -1.13 | 0.61  | 0.01  | 1    | 0.5   | 1     | 0.19  |
| IMAGp998B22245  | USP34    | ubiquitin specific protease 34                                                 |           | 9736  | 0.42  | 0.19  | 0.49  | 0.63  | 0.39  | -0.04 | 0.02  | 0.03  | 0.15  | 0.51  | -0.07 | -0.05 | 0.1   | -0.48 | -0.1 | -0.4  | -0.25 |       |
| IMAGp998O10119  | VCP      | valosin-containing protein                                                     | NM_007126 | 7415  | -0.89 | -0.52 | -0.6  | -0.17 | 0.09  | 0.1   | 0.82  | -0.56 | -0.72 | -0.28 | 0.58  | 0.27  | 0.29  | 0.86  | 0.55 | 1.1   | 0.39  |       |
| IMAGp998D08136  | VDAC1    | voltage-dependent anion channel 1                                              | NM_003374 | 7416  | -0.8  | -0.43 | -1.05 | -0.53 | -0.24 | 0.22  | -0.1  | -0.37 | -0.3  | -0.72 | -0.57 | 0.01  | 0.46  | 0.06  | 1.46 | 1.05  | 0.9   | 0.81  |
| IMAGp998A0394   | WDR10    | WD repeat domain 10                                                            |           | 55764 | -0.56 | -0.16 | 0.14  | -0.29 | 0.13  | -0.81 | -0.3  | -0.41 | 0.28  | 0.42  | 1.34  | 0.52  | 0.66  | 1.3   | 0.92 |       |       |       |
