# Supplementary material for: Molecular mechanisms of the antiangiogenic and antitumor effects of mycophenolic acid
Source: Oxford University Press journal article supplement (doi:10.1158/1535-7163.mct-08-0193), 2008-06-01
Supplement: 15357163mct080193-sup-mct-08-0193--suppl_table_2.pdf [file 15357163mct080193-sup-mct-08-0193--suppl_table_2.pdf]

| Clone Id        | Gene Name | Description                                                                             | Refseq    | GeneID | HDMVEC_6h | HDMVEC_12h | HDMVEC_12h | HDMVEC_12h | HDMVEC_12h | HDMVEC_12h | Fibro_6h | Fibro_12h | Fibro_12h | Fibro_12h | Fibro_12h | U87_6h | U87_12h | U87_12h | U87_12h | U87_12h |       |      |
|-----------------|-----------|-----------------------------------------------------------------------------------------|-----------|--------|-----------|------------|------------|------------|------------|------------|----------|-----------|-----------|-----------|-----------|--------|---------|---------|---------|---------|-------|------|
| IMAGp998C10644  | ABCC4     | ATP-binding cassette, sub-family C (CFTR/MRP), member 4 (ABCC4), mRNA                   | NM_005845 | 10257  | -0.81     | -0.17      | -0.46      | -0.16      | -0.08      | -0.46      | 0.01     | -0.22     | -0.3      | -0.6      | -0.24     | -0.02  | 0       | 0.32    | 0.52    | 0.22    | 1.3   | 0.38 |
| IMAGp998E14213  | ABCD3     | ATP-binding cassette, sub-family D (ALD), member 3 (ABCD3), mRNA                        | NM_002858 | 5825   | -0.74     | -0.38      | -0.53      | -0.51      | -0.33      | -1.48      | 0.11     | -0.11     | -0.25     | 0.3       | -0.14     | -0.32  | -0.18   | 0.61    | 0.56    | 1.2     | 1.23  | 0    |
| IMAGp998H08121  | ABCE1     | ATP-binding cassette, sub-family E (OABP), member 1 (ABCE1), mRNA                       | NM_002940 | 6059   | -0.66     | -0.46      | -0.86      | -0.26      | -0.49      | -0.98      | -0.28    | 0.4       | -0.49     | 0.05      | 0.48      | -0.2   | 0.14    | -0.39   | 1.28    | 1.43    | 0     | 1.66 |
| IMAGp998L12229  | ABCF2     | ATP-binding cassette, sub-family F (GCN20), member 2 (ABCF2), nuclear gene encoding mit | NM_007189 | 10061  | -0.73     | -0.09      | -0.89      | -0.18      | -0.26      | -1.15      | -0.14    | -0.19     | -0.29     | -0.29     | -0.5      | -0.41  | 0.01    | -0.15   | 0.59    | 0.66    | 0.3   | 0.45 |
| IMAGp998C06652  | ACAT2     | Acetyl-Coenzyme A acetyltransferase 2 (acetoacetyl Coenzyme A thiolase) (ACAT2), mRNA   | NM_005891 | 39     | -0.52     | -0.67      | -1.29      | -0.97      | 0.3        | -0.97      | 0.09     | 0.31      | -0.04     | -0.25     | 0.25      | 0.11   | -0.06   | 0.04    | 0.51    | 0.11    | 0.4   | 0.53 |
| IMAGp998D201785 | ACR       | Acrosin (ACR), mRNA                                                                     | NM_001097 |        | -0.39     | -0.26      | 0.31       | -0.57      | -0.5       | 0.04       | 0.34     | -0.14     | -0.24     | -0.04     | -0.22     | 0.63   | -0.01   | 0.25    | 0.71    | 0.46    | 0     | 0.88 |
| IMAGp998O02119  | ACSL3     | Acyl-CoA synthetase long-chain family member 3                                          | 2181      | -0.89  | -0.37     | -0.46      | -0.75      | -1.03      | -1.2       | 0.4        | 0.11     | 0.12      | -0.47     | -0.67     | 0.03      | 0.38   | 0.2     | 0.92    | 1.2     | 0.8     | -0.61 |      |
| IMAGp998P01118  | ACTR2     | ARP2 actin-related protein 2 homolog (yeast) (ACTR2), mRNA                              | NM_005722 |        | -0.99     | -1.32      | -0.97      | -1.55      | -1.68      | -1.26      | 0.78     | 0.26      | 0.14      | -0.19     | -0.38     | 0.22   | 0.39    | -0.12   | 2.59    | 2.01    | 2.5   | 1.89 |
| IMAGp998G22650  | ACTR3     | ARP3 actin-related protein 3 homolog (yeast)                                            | NM_005721 | 10096  | -0.29     | -0.91      | -0.24      | -0.78      | 0.23       | -1.48      | 0.27     | 0.06      | -0.21     | 0.75      | 0.56      | -0.01  | 0.13    | 0.19    | 1.51    | 0.84    | 0.6   | 1.29 |
| IMAGp998L183971 | ACVR2     | Activin A receptor, type IIA                                                            |           | 92     | -1.59     | -0.75      | 1.3        | -0.46      | 0.27       | -1.45      | -0.26    | 0.33      | -0.77     | -0.25     | 0.75      | 0.03   | 0.02    | -0.31   | 0.37    | 0.79    | 0.5   | 1.39 |
| IMAGp998D18395  | ADAM9     | A disintegrin and metalloproteinase domain 9 (meltrin gamma) (ADAM9), mRNA              | NM_003816 | 8754   | -0.49     | -1.34      | -0.27      | -1.49      | -1.32      | -0.45      | 0.75     | 0         | 0.76      | 0.32      | -0.65     | 0.3    | 0.14    | 0.35    | 1.92    | 1.29    | 1.2   | 1.13 |
| IMAGp998N04617  | ADK       | Adenosine kinase (ADK), transcript variant ADK-long, mRNA                               | NM_006721 | 132    | -0.73     | -0.26      | -1         | -0.65      | -0.65      | -0.38      | 0.01     | -0.03     | -0.28     | 0.34      | -0.63     | 0.09   | 0.26    | -0.47   | 0.68    | 0.75    | 0.4   | 0    |
| IMAGp998L21872  | ADORA2B   | Adenosine A2b receptor (ADORA2B), mRNA                                                  | NM_000676 | 136    | -0.67     | 0          | -0.66      | -0.46      | -1.26      | -0.5       | -0.5     | -0.54     | -0.28     | 0.55      | 0.07      | 0.3    | 0.05    | -0.07   | 0.52    | 0.51    | 0.7   | 1.16 |
| IMAGp998O132012 | AF15Q14   | Cancer susceptibility candidate 5                                                       |           | 57082  | -0.53     | -0.36      | -0.72      | -1.05      | -1.47      | -1.46      | 0.63     | -0.21     | -0.19     | -0.23     | -0.74     | 0.11   | 0.23    | 0.22    | 1.12    | 1.02    | 1.3   | 0.64 |
| IMAGp998P051933 | AGL       | Amylo-1, 6-glucosidase, 4-alpha-glucanotransferase (glycogen debranching enzyme, glycog | NM_000646 | 178    | -0.67     | -0.15      | -0.38      | 0.37       | -0.33      | -0.71      | 0.05     | 0.13      | -0.15     | -0.24     | 0.51      | 0.27   | -0.2    | 0.24    | 0.59    | 0.42    | 0     | 0.39 |
| IMAGp998C102004 | AK3L1     | Adenylate kinase 3 like 1 (AK3L1), mRNA                                                 | NM_016282 | 50808  | -0.53     | -0.62      | -0.08      | -0.44      | -0.17      | 0.09       | 0.4      | 0.12      | 0.61      | 0.07      | 0.25      | 0.77   | 0.08    | -0.01   | 1.43    | 1.01    | 0.9   | 1.41 |



|                 |          |                                                                                    |       |       |       |       |       |       |       |       |       |       |   |
|-----------------|----------|------------------------------------------------------------------------------------|-------|-------|-------|-------|-------|-------|-------|-------|-------|-------|---|
| IMAGp998P1492   | ARL1     | ADP-ribosylation factor-like 1 (ARL1), mRNA                                        |       |       |       |       |       |       |       |       |       |       |   |
| NM_001177       | 400      |                                                                                    | -0.83 | -0.54 | -0.88 | -0.6  | -0.56 | -1.65 | 0.24  | 0.22  | 0.25  | -     |   |
| 0.17            | 0.72     | 0.09                                                                               | 0.27  | -0.14 | 0.71  | 0.51  | 0.5   | 0.9   |       |       |       |       |   |
| IMAGp998E04437  | ARL6IP2  | ADP-ribosylation factor-like 6 interacting protein 2                               |       |       |       |       |       |       |       |       |       |       |   |
| 64225           |          |                                                                                    | -0.53 | -0.43 | -0.67 | -0.68 | -0.71 | -0.31 | -0.4  | -0.48 | -0.66 | -0.1  | - |
| 1.05            | -0.05    | 0.18                                                                               | -0.51 | 0.77  | 0.86  | 1.1   | 1.22  |       |       |       |       |       |   |
| IMAGp998M201924 | ARL8     | ADP-ribosylation factor-like 8 (ARL8), mRNA                                        |       |       |       |       |       |       |       |       |       |       |   |
| NM_178815       |          |                                                                                    | -0.35 | -0.4  | -0.36 | -0.3  | -0.33 | -0.55 | 0.2   | 0.16  | 0.27  |       |   |
| 0.12            | 0.87     | 0.56                                                                               | 0.17  | -0.02 | 1.15  | 0.85  | 0.2   | 1.1   |       |       |       |       |   |
| IMAGp998A14375  | ARMET    | Arginine-rich, mutated in early stage tumors (ARMET), mRNA                         |       |       |       |       |       |       |       |       |       |       |   |
| NM_006010       | 7873     |                                                                                    | -0.66 | -0.68 | -0.99 | -0.77 | -0.78 | -0.31 | 0.05  | -0.19 | -0.54 | -     |   |
| 0.93            | -0.84    | -0.46                                                                              | 0.34  | -0.44 | 1.48  | 1.25  | 0.4   | 0.25  |       |       |       |       |   |
| IMAGp998N161907 | ARPC5    | Actin related protein 2/3 complex, subunit 5, 16kDa (ARPC5), mRNA                  |       |       |       |       |       |       |       |       |       |       |   |
| NM_005717       |          |                                                                                    |       |       | 0     | -0.72 | -0.6  | -0.77 | 0     | -0.78 | 0.45  | -     |   |
| 0.31            | -0.12    | -0.87                                                                              | 0.32  | 0.14  | 0.16  | 0.07  | 1.48  | 0.79  | 0     | 0.68  |       |       |   |
| IMAGp998O031961 | ASK      | Activator of S phase kinase (ASK), mRNA                                            |       |       |       |       |       |       |       |       |       |       |   |
| NM_006716       |          |                                                                                    |       |       |       |       |       |       |       |       |       |       |   |
| 10926           | -1.33    | -0.72                                                                              | -0.9  | -1.45 | -1.09 | -0.01 | -0.44 | -0.47 | -0.36 | -0.67 | -1.05 |       |   |
| 0.29            | 0.12     | -0.26                                                                              | 1.31  | 1.07  | 1.4   | 0.45  |       |       |       |       |       |       |   |
| IMAGp998O021745 | ASK      | Activator of S phase kinase (ASK), mRNA                                            |       |       |       |       |       |       |       |       |       |       |   |
| NM_006716       |          |                                                                                    |       |       |       |       |       |       |       |       |       |       |   |
| 10926           | -1.31    | -1.2                                                                               | -1.54 | -1.46 | -0.87 | -1.52 | -0.44 | -0.38 | -0.79 | -0.5  | -0.54 |       |   |
| 0.57            | 0.05     | -0.4                                                                               | 1.01  | 1.14  | 0.6   | 1.5   |       |       |       |       |       |       |   |
| IMAGp998A18227  | ATP6AP2  | ATPase, H+ transporting, lysosomal accessory protein 2 (ATP6AP2), mRNA             |       |       |       |       |       |       |       |       |       |       |   |
| NM_005765       |          |                                                                                    |       |       | 10159 | -1.15 | 0.08  | -0.59 | -0.16 | -1.3  | -     |       |   |
| 1.16            | 0        | 0.14                                                                               | -0.12 | 0.03  | 0.16  | 0.41  | -0.12 | -0.46 | 0.96  | 1.39  | 1.1   | 1.46  |   |
| IMAGp998D12182  | ATP6V1A  | ATPase, H+ transporting, lysosomal 70kDa, V1 subunit A (ATP6V1A), mRNA             |       |       |       |       |       |       |       |       |       |       |   |
| NM_001690       |          |                                                                                    |       |       | 523   | -0.39 | -0.3  | -0.02 | -0.62 | -0.1  | -     |       |   |
| 0.17            | 0.36     | 0.41                                                                               | 0.36  | 0.01  | 0.23  | 0.79  | 0.18  | 0.12  | 1.24  | 0.6   | 0.9   | 0.24  |   |
| IMAGp998O10594  | ATP6V1C1 | ATPase, H+ transporting, lysosomal 42kDa, V1 subunit C, isoform 1                  |       |       |       |       |       |       |       |       |       |       |   |
|                 |          |                                                                                    |       |       | 528   | -0.17 | -0.71 | 0.05  | -0.99 | -0.41 | -0.54 | 0.88  | - |
| 0.43            | 0.47     | -0.3                                                                               | -0.35 | -0.05 | 0.03  | 0.47  | 0.63  | -0.01 | 0.8   | 0.58  |       |       |   |
| IMAGp998D07421  | ATP6V1H  | ATPase, H+ transporting, lysosomal 50/57kD V1 subunit H (ATP6V1H), mRNA            |       |       |       |       |       |       |       |       |       |       |   |
| NM_015941       |          |                                                                                    |       |       | 51606 | -0.66 | -0.48 | -0.71 | -0.57 | -0.62 | 0     |       |   |
| 0.01            | 0.04     | -0.07                                                                              | -0.34 | 0.14  | -0.22 | 0.08  | -0.06 | 0.85  | 0.8   | 0     | 0.82  |       |   |
| IMAGp998L04886  | AZI2     | 5-azacytidine induced 2                                                            |       |       |       |       |       |       |       |       |       |       |   |
|                 |          |                                                                                    |       |       |       |       |       | 64343 | -0.67 | -0.3  | -1.08 | -     |   |
| 0.27            | -0.98    | -0.52                                                                              | -0.15 | 0.15  | -0.23 | -0.07 | -0.94 | -0.07 | -0.2  | -0.19 | 0.32  | 0.57  | 1 |
| 0.1             |          |                                                                                    |       |       |       |       |       |       |       |       |       |       |   |
| IMAGp998G141155 | BASP1    | Brain abundant, membrane attached signal protein 1 (BASP1), mRNA                   |       |       |       |       |       |       |       |       |       |       |   |
| NM_006317       |          |                                                                                    |       |       |       |       |       |       |       |       |       |       |   |
| 0.34            | -0.38    | -0.26                                                                              | 0.22  | -0.29 | 0.08  | 0.05  | 1.14  | 0.7   | 0.3   | 0.86  |       |       |   |
| IMAGp998F16646  | BAZ1B    | Bromodomain adjacent to zinc finger domain, 1B (BAZ1B), transcript variant 2, mRNA |       |       |       |       |       |       |       |       |       |       |   |
| NM_032408       |          |                                                                                    |       |       |       |       |       |       |       |       |       |       |   |
| 0.84            | -0.15    | 0.05                                                                               | -0.26 | -0.46 | 0.12  | -0.22 | 0.22  | -0.04 | 1.42  | 1.17  | 0.1   | 2.11  | - |
| IMAGp998G03685  | BCAS2    | Breast carcinoma amplified sequence 2 (BCAS2), mRNA                                |       |       |       |       |       |       |       |       |       |       |   |
| NM_005872       |          |                                                                                    |       |       |       |       |       |       |       |       |       |       |   |
| 0.15            | 0.71     | 0.92                                                                               | 0.26  | -0.32 | 1     | 1.12  | 0.7   | 0.87  |       |       |       |       |   |
| IMAGp998N24628  | BCAT1    | Branched chain aminotransferase 1, cytosolic (BCAT1), mRNA                         |       |       |       |       |       |       |       |       |       |       |   |
| NM_005504       |          |                                                                                    |       |       |       |       |       |       |       |       |       |       |   |
| 0.01            | 0.19     | 0.44                                                                               | -0.09 | 0.05  | 0.09  | 0.24  | 0.1   | 1.01  |       |       |       |       |   |
| IMAGp998A08613  | BCCIP    | BRCA2 and CDKN1A interacting protein (BCCIP), transcript variant C, mRNA           |       |       |       |       |       |       |       |       |       |       |   |
| NM_078469       |          |                                                                                    |       |       |       |       |       |       |       |       |       |       |   |
| 0.28            | -0.45    | 0.03                                                                               | -0.45 | -0.1  | 0.19  | -0.92 | 1.79  | 1.95  | 1.5   | 1.93  |       |       |   |
| IMAGp998D24523  | BRP44L   | Brain protein 44-like (BRP44L), mRNA                                               |       |       |       |       |       |       |       |       |       |       |   |
| NM_016098       |          |                                                                                    |       |       |       |       |       |       |       |       |       |       |   |
| 0.18            | 0.67     | 0.09                                                                               | 0.07  | -0.19 | 0.16  | 0.37  | 0.5   | 0.65  |       |       |       |       |   |
| IMAGp998K075264 | BRWD3    | Bromodomain and WD repeat domain containing 3                                      |       |       |       |       |       |       |       |       |       |       |   |
|                 |          |                                                                                    |       |       |       |       |       |       |       |       |       |       |   |
| 254065          |          |                                                                                    | -0.57 | -0.35 | -0.94 | -0.4  | -0.72 | 0.08  | 0.12  | 0.12  | 0.34  | -0.87 | 0 |
| -0.04           | 0.15     | -0.1                                                                               | 0.97  | 0.93  | 0.9   | 0.44  |       |       |       |       |       |       |   |

|                 |          |                                                                           |           |       |       |       |       |       |       |       |        |
|-----------------|----------|---------------------------------------------------------------------------|-----------|-------|-------|-------|-------|-------|-------|-------|--------|
| IMAGp998E161924 | BUB1     | BUB1 budding uninhibited by benzimidazoles 1 homolog (yeast) (BUB1), mRNA | NM_004336 | 699   | -0.56 | -0.26 | -1.59 | -1.19 | -1.31 | -2.32 | -      |
|                 |          |                                                                           |           |       | 0.01  | -0.02 | -0.66 | -0.59 | 0.02  | 0.4   | 0.27   |
|                 |          |                                                                           |           |       |       |       |       |       | -0.47 | 1.64  | 1.47   |
|                 |          |                                                                           |           |       |       |       |       |       | 1.1   | 0.84  |        |
| IMAGp998B01363  | BUB3     | BUB3 budding uninhibited by benzimidazoles 3 homolog (yeast) (BUB3), mRNA | NM_004725 | 9184  | -0.51 | -0.17 | -0.77 | -0.37 | -0.97 | -1.32 | -      |
|                 |          |                                                                           |           |       | 0.31  | 0.03  | -0.78 | -0.31 | -0.18 | -0.45 | -0.02  |
|                 |          |                                                                           |           |       |       |       |       |       | -0.18 | 0.9   | 1.02   |
|                 |          |                                                                           |           |       |       |       |       |       | 1     | 0.9   |        |
| IMAGp998H035765 | C10orf3  | Chromosome 10 open reading frame 3 (C10orf3), mRNA                        | NM_018131 | 55165 | -0.11 | -0.25 | -1.3  | 0.4   | -1.65 | -1.52 | 0.22   |
|                 |          |                                                                           |           |       | 0.31  | -1.09 | 0     | 0.11  | -0.04 | 2.05  | 1.66   |
|                 |          |                                                                           |           |       |       |       |       |       | 1.4   | 2.42  |        |
| IMAGp998C093379 | C10orf3  | Chromosome 10 open reading frame 3 (C10orf3), mRNA                        | NM_018131 | 55165 | -0.48 | 0.09  | -1.88 | 0.54  | -1.54 | -1.02 | 0.4    |
|                 |          |                                                                           |           |       | 0.48  | 0.6   | -0.02 | 0.41  | -0.17 | 2.51  | 1.92   |
|                 |          |                                                                           |           |       |       |       |       |       | 1.1   | 0.56  |        |
| IMAGp998O15353  | C10orf61 | Chromosome 10 open reading frame 61                                       |           |       |       |       |       |       |       | 26123 | -      |
|                 |          |                                                                           |           |       | 0.14  | -0.35 | -0.41 | -0.15 | -0.57 | -0.22 | -0.11  |
|                 |          |                                                                           |           |       |       |       |       |       | -0.36 | -0.21 | -0.2   |
|                 |          |                                                                           |           |       |       |       |       |       | -0.59 | -0.24 | 0.2    |
|                 |          |                                                                           |           |       | 0.03  | 0.27  | 0.35  | 0.8   | 0.94  |       |        |
| IMAGp998N23415  | C10orf69 | Chromosome 10 open reading frame 69 (C10orf69), mRNA                      | NM_006459 | 10613 | -0.36 | -0.19 | -0.8  | -0.64 | -0.73 | -1    | 0.13   |
|                 |          |                                                                           |           |       | 0.1   | 0.27  | -0.05 | -0.08 | 0.18  | 0.82  | 0.64   |
|                 |          |                                                                           |           |       |       |       |       |       | 0.6   | 0.62  |        |
| IMAGp998O081936 | C10orf84 | hypothetical protein FLJ13188 (FLJ13188), mRNA                            | NM_022063 | 63877 | -1.41 | -0.17 | -1.56 | -0.29 | -0.7  | -1.35 | -0.35  |
|                 |          |                                                                           |           |       | 0.12  | 0.21  | 0.23  | 0.05  | -0.47 | 0.27  | 0.84   |
|                 |          |                                                                           |           |       |       |       |       |       | 0.4   | 0.55  |        |
| IMAGp998N151205 | C10orf9  | Chromosome 10 open reading frame 9                                        |           |       |       |       |       |       |       |       | 219771 |
|                 |          |                                                                           |           |       | -0.32 | -0.66 | -0.22 | -0.67 | -0.4  | -0.49 | -0.02  |
|                 |          |                                                                           |           |       |       |       |       |       | -0.23 | -0.18 | -0.43  |
|                 |          |                                                                           |           |       | 0.23  | 0.36  | 0.73  | 0.41  | 0.4   | 1.54  | -0.17  |
|                 |          |                                                                           |           |       |       |       |       |       |       | -0.32 | -      |
| IMAGp998N06152  | C12orf22 | Chromosome 12 open reading frame 22 (C12orf22), mRNA                      | NM_030809 | 81566 | -0.76 | 0.58  | -0.98 | -0.68 | -1.18 | -0.68 | -0.28  |
|                 |          |                                                                           |           |       | 1.01  | 0.49  | 0.62  | 0.03  | -0.03 | 0.81  | 0.8    |
|                 |          |                                                                           |           |       |       |       |       |       | 0.9   | 0.74  |        |
| IMAGp998O10626  | C13orf10 | Chromosome 13 open reading frame 10 (C13orf10), mRNA                      | NM_022118 | 64062 | -0.43 | -0.87 | -0.17 | -0.63 | -0.33 | 0.26  | 0.1    |
|                 |          |                                                                           |           |       | 0.38  | -0.26 | 0.26  | 0.28  | -0.14 | 0.17  | 0.74   |
|                 |          |                                                                           |           |       |       |       |       |       | 0.31  | 0.6   | 0.89   |
| IMAGp998O09123  | C14orf32 | Chromosome 14 open reading frame 32 (C14orf32), mRNA                      | NM_144578 | 93487 | -0.71 | -0.21 | -0.6  | -0.48 | -0.48 | -0.94 | 0.03   |
|                 |          |                                                                           |           |       | 0.26  | 0.18  | 0.34  | -0.2  | 0     | 0.51  | 0.58   |
|                 |          |                                                                           |           |       |       |       |       |       | 0     | 1.14  |        |
| IMAGp998H02199  | C15orf15 | Chromosome 15 open reading frame 15 (C15orf15), mRNA                      | NM_016304 | 51187 | -1.47 | -0.2  | -1.32 | -0.48 | -1.03 | -0.78 | -0.11  |
|                 |          |                                                                           |           |       | 0.13  | -0.28 | -0.33 | 0.03  | -0.98 | 0.78  | 1.41   |
|                 |          |                                                                           |           |       |       |       |       |       | 0.8   | 1.08  |        |
| IMAGp998L01121  | C15orf15 | Chromosome 15 open reading frame 15 (C15orf15), mRNA                      | NM_016304 | 51187 | -0.73 | -0.94 | -0.33 | -0.91 | -0.09 | -0.51 | 0.32   |
|                 |          |                                                                           |           |       | 0.46  | -0.03 | 0.26  | 0.23  | -0.23 | 0.11  | 0.86   |
|                 |          |                                                                           |           |       |       |       |       |       | 1.3   | -0.24 |        |
| IMAGp998F14648  | C17orf25 | CGI-150 protein (CGI-150), mRNA                                           | NM_016080 | 51031 | -0.28 | -0.74 | -0.25 | -0.67 | -0.46 | 0.01  | 0.38   |
|                 |          |                                                                           |           |       | 0.09  | 0.13  | 0.19  | 1.33  | 0.57  | -0.1  | 0.74   |
|                 |          |                                                                           |           |       |       |       |       |       |       |       |        |
| IMAGp998M23234  | C1orf22  | Chromosome 1 open reading frame 22 (C1orf22), mRNA                        | NM_025191 | 80267 | -0.36 | -0.71 | -0.29 | -0.6  | -0.23 | -0.12 | 0.1    |
|                 |          |                                                                           |           |       | 0.15  | -0.43 | 0.21  | -0.07 | 0.14  | 0.85  | 0.66   |
|                 |          |                                                                           |           |       |       |       |       |       | 0.3   | 0.87  |        |
| IMAGp998H19387  | C1orf22  | Chromosome 1 open reading frame 22 (C1orf22), mRNA                        | NM_025191 | 80267 | -0.35 | -0.51 | -0.33 | -0.75 | -0.64 | -0.28 | 0.09   |
|                 |          |                                                                           |           |       | 0.38  | -0.33 | -0.33 | 0.267 | -0.15 | 0     | 0.88   |
|                 |          |                                                                           |           |       |       |       |       |       | 0.71  | 0.1   | 0.43   |
| IMAGp998E07608  | C20orf45 | Chromosome 20 open reading frame 45 (C20orf45), mRNA                      | NM_016045 |       | -0.62 | -0.3  | -0.29 | -0.45 | -0.71 | -0.59 | 0.11   |
|                 |          |                                                                           |           |       | 0.03  | 0.67  | 0.11  | 0     | -0.09 | 1.07  | 0.78   |
|                 |          |                                                                           |           |       |       |       |       |       | 1.2   | 2.35  |        |
| IMAGp998L01349  | C2orf18  | Chromosome 2 open reading frame 18                                        |           |       |       |       |       |       |       |       | 54978  |
|                 |          |                                                                           |           |       | 0.82  | -0.72 | -0.95 | -0.56 | -0.88 | -0.8  | -0.18  |
|                 |          |                                                                           |           |       |       |       |       |       | -0.08 | -0.46 | -0.09  |
|                 |          |                                                                           |           |       | 0.05  | -0.24 | -0.01 | -0.2  | -0.03 | 0.04  | -0.36  |
|                 |          |                                                                           |           |       |       |       |       |       |       | 0.04  | -0.36  |
|                 |          |                                                                           |           |       |       |       |       |       |       | 1.45  | -      |
| IMAGp998D13403  | C2orf25  | hypothetical protein CL25022 (CL25022), mRNA                              | NM_015702 | 27249 | -0.83 | -0.93 | -0.65 | -0.9  | -0.28 | -0.28 | -0.02  |
|                 |          |                                                                           |           |       | 0.07  | -0.62 | 0.2   | 0.3   | -0.35 | 1.2   | 1      |
|                 |          |                                                                           |           |       |       |       |       |       | 0.9   | 0.42  |        |



|                 |         |                                                                                         |           |       |       |       |       |       |       |       |       |       |       |       |       |       |       |       |       |       |   |
|-----------------|---------|-----------------------------------------------------------------------------------------|-----------|-------|-------|-------|-------|-------|-------|-------|-------|-------|-------|-------|-------|-------|-------|-------|-------|-------|---|
| IMAGp998G091961 | CCNH    | cyclin H (CCNH), mRNA                                                                   | NM_001239 | 902   | -1.62 | -0.13 | -     | 1.46  | -0.31 | -0.81 | -1.19 | -0.6  | 0.21  | -0.4  | -0.03 | -0.12 | 0.05  | 0.05  | -0.56 | 0.39  |   |
|                 |         |                                                                                         |           |       |       |       |       | 0.82  | 1     |       | -0.2  |       |       |       |       |       |       |       |       |       |   |
| IMAGp998F19578  | CCT6A   | chaperonin containing TCP1, subunit 6A (zeta 1) (CCT6A), mRNA                           | NM_001762 | 908   | -0.61 | -0.8  | -0.61 | -0.88 | -0.67 | -0.63 | 0     |       |       |       |       |       |       |       | -0.17 | -0.58 | - |
|                 |         |                                                                                         |           |       |       |       |       | 0.35  | -0.32 | 0     | 0     | -0.07 | 0.75  | 0.58  | 0.1   | 0.44  |       |       |       |       |   |
| IMAGp998H22222  | CD2AP   | CD2-associated protein (CD2AP), mRNA                                                    | NM_012120 |       |       |       |       |       |       |       |       |       |       |       |       |       |       |       |       |       |   |
|                 |         |                                                                                         |           |       |       |       |       | 23607 | -0.79 | -0.39 | -0.59 | -0.6  | 0     |       | -0.76 | -0.2  | 0.22  | -0.22 | 0.04  | 0.57  |   |
|                 |         |                                                                                         |           |       |       |       |       | 0.27  | -0.08 | -0.1  | 0.72  | 0.59  | 0.4   | 0.49  |       |       |       |       |       |       |   |
| IMAGp998F011167 | CD58    | CD58 antigen, (lymphocyte function-associated antigen 3) (CD58), mRNA                   | NM_001779 | 965   | -0.15 | -0.05 | -0.16 | -0.22 | -0.39 | -0.33 | 0.08  | -     |       |       |       |       |       |       |       |       |   |
|                 |         |                                                                                         |           |       |       |       |       | 0.08  | -0.11 | 0.05  | -0.26 | 0.04  | -0.04 | -0.02 | 0.63  | 0.24  | 0.6   | 0.38  |       |       |   |
| IMAGp998C20974  | CDC16   | CDC16 cell division cycle 16 homolog (S. cerevisiae) (CDC16), mRNA                      | NM_003903 | 8881  | -1.1  | 0.1   | -1.03 | -0.07 | -0.2  | -1.15 | -0.3  |       |       |       |       |       |       |       |       |       |   |
|                 |         |                                                                                         |           |       |       |       |       | 0.39  | -0.36 | -0.04 | -0.51 | 0.28  | -0.02 | -0.3  | 0.46  | 0.94  | 0.7   | 1.05  |       |       |   |
| IMAGp998O131824 | CDC2    | cell division cycle 2, G1 to S and G2 to M (CDC2), transcript variant 2, mRNA           | NM_033379 | 983   | -0.86 | -0.71 | -1.42 | -1.58 | -0.87 | -     |       |       |       |       |       |       |       |       |       |       |   |
|                 |         |                                                                                         |           |       |       |       |       | 0.79  | -0.5  | -0.91 | 0.05  | -0.2  | 0.11  | 0.02  | 0.36  | -0.25 | 1.32  | 1.21  | 2.7   | 0.24  |   |
| IMAGp998K14639  | CDC7    | CDC7 cell division cycle 7 (S. cerevisiae) (CDC7), mRNA                                 | NM_003503 | 8317  | -0.61 | -0.31 | -1.01 | -0.64 | -0.51 | -0.77 | -0.2  | 0.29  | -0.01 |       |       |       |       |       |       |       |   |
|                 |         |                                                                                         |           |       |       |       |       | 0.06  | 0.12  | 0.58  | -0.1  | -0.27 | 0.18  | 0.42  | 0.4   | 0.58  |       |       |       |       |   |
| IMAGp998D081794 | CDCA1   | cell division cycle associated 1 (CDCA1), transcript variant 1, mRNA                    | NM_145697 |       |       |       |       |       |       |       |       |       |       |       |       |       |       |       |       |       |   |
|                 |         |                                                                                         |           |       |       |       |       | 0.16  | -0.49 | -0.55 | 0.48  | -0.1  | 0.29  | -0.13 | 1.22  | 1.07  | 1.1   | 0.57  |       |       |   |
| IMAGp998L151775 | CDCA3   | cell division cycle associated 3 (CDCA3), mRNA                                          | NM_031299 | 83461 | -0.11 | -0.06 | -1.41 | -0.7  | -1.29 | -0.7  | -0.06 | -0.42 | -0.78 | -     |       |       |       |       |       |       |   |
|                 |         |                                                                                         |           |       |       |       |       | 0.96  | -1.04 | -0.43 | 0.33  | -0.51 | 1.04  | 0.92  | 1.4   | 0.49  |       |       |       |       |   |
| IMAGp998G191932 | CENPF   | centromere protein F, 350/400ka (mitosin) (CENPF), mRNA                                 | NM_016343 |       |       |       |       |       |       |       |       |       |       |       |       |       |       |       |       |       |   |
|                 |         |                                                                                         |           |       |       |       |       | 0.48  | -0.07 | -0.23 | 0.08  | -0.39 | 1.4   | 1.54  | 0.8   | 1.54  |       |       |       |       |   |
| IMAGp998D05121  | CHCHD3  | coiled-coil-helix-coiled-coil-helix domain containing 3 (CHCHD3), mRNA                  | NM_017812 | 54927 | -0.7  | -0.45 | -0.71 | -1    | -0.29 | -     |       |       |       |       |       |       |       |       |       |       |   |
|                 |         |                                                                                         |           |       |       |       |       | 0.42  | -0.2  | -0.16 | -0.3  | -0.62 | -0.35 | -0.53 | 0.29  | -0.22 | 0.66  | 0.33  | 0.5   | -0.58 |   |
| IMAGp998O03327  | CHD5    | Chromodomain helicase DNA binding protein 5 (CHD5), mRNA                                | NM_015557 | 26038 | -0.55 | -0.41 | -0.45 | -0.5  | -0.41 | -0.27 | 0.07  | -0.12 | -0.28 | -     |       |       |       |       |       |       |   |
|                 |         |                                                                                         |           |       |       |       |       | 0.21  | -0.42 | 0.1   | -0.03 | 0.03  | 0.88  | 0.75  | 0.2   | 0.35  |       |       |       |       |   |
| IMAGp998H08646  | CHIC1   | Cysteine-rich hydrophobic domain 1                                                      |           | 53344 | -0.01 | -     |       |       |       |       |       |       |       |       |       |       |       |       |       |       |   |
|                 |         |                                                                                         |           |       |       |       |       | 0.41  | -0.57 | -0.11 | -0.18 | 0.01  | 0.48  | 0.02  | 0.14  | -0.03 | -0.15 | -0.04 | 0.22  | 0.2   |   |
|                 |         |                                                                                         |           |       |       |       |       | 0.19  | 0.11  | 0.9   | 0.31  |       |       |       |       |       |       |       |       |       |   |
| IMAGp998B09562  | CHORDC1 | Cysteine and histidine-rich domain (CHORD)-containing, zinc binding protein 1 (CHORDC1) | NM_012124 | 26973 | -1.19 | -0.31 | -     |       |       |       |       |       |       |       |       |       |       |       |       |       |   |
|                 |         |                                                                                         |           |       |       |       |       | 0.22  | -0.54 | -0.07 | -0.31 | -0.46 | -0.21 | -0.32 | 0.07  | -0.23 | 0.37  | -0.08 | -0.08 | 0.5   |   |
|                 |         |                                                                                         |           |       |       |       |       | 0.31  | 0.5   | 0.38  |       |       |       |       |       |       |       |       |       |       |   |
| IMAGp998P0288   | CIRH1A  | Cirrhosis, autosomal recessive 1A (cirhin) (CIRH1A), mRNA                               | NM_032830 | 84916 | -1.13 | -0.48 | -1.18 | -0.59 | -0.55 | -0.96 | -0.64 | -     |       |       |       |       |       |       |       |       |   |
|                 |         |                                                                                         |           |       |       |       |       | 0.39  | -0.98 | -0.72 | -1.1  | -0.09 | -0.15 | -0.1  | 0.5   | 0.58  | 0.6   | -0.41 |       |       |   |
| IMAGp998F08194  | CKAP2   | Cytoskeleton associated protein 2 (CKAP2), mRNA                                         | NM_018204 | 26586 | -0.46 | -0.06 | -0.78 | -1.19 | -0.89 | -0.82 | 0.23  | -0.23 | -0.1  |       |       |       |       |       |       |       |   |
|                 |         |                                                                                         |           |       |       |       |       | 0.22  | -0.39 | -0.14 | 0.44  | -0.29 | 1.38  | 0.73  | 1.5   | 1.06  |       |       |       |       |   |
| IMAGp998M16679  | CKAP4   | Cytoskeleton-associated protein 4 (CKAP4), mRNA                                         | NM_006825 | 10970 | -0.3  | 0.02  | -0.55 | -0.72 | -0.64 | -0.56 | 0.35  | 0.05  | -0.52 | -     |       |       |       |       |       |       |   |
|                 |         |                                                                                         |           |       |       |       |       | 0.59  | 0.27  | -0.15 | -0.09 | -0.05 | 1.38  | 1.41  | 0.3   | 0.53  |       |       |       |       |   |
| IMAGp998G143938 | CKS1B   | CDC28 protein kinase regulatory subunit 1B (CKS1B), mRNA                                | NM_001826 | 1163  | 0.18  | 0.06  | -0.63 | -0.83 | -0.84 | -0.69 | 0.42  | 0.07  | -0.32 | -     |       |       |       |       |       |       |   |
|                 |         |                                                                                         |           |       |       |       |       | 0.16  | 0.3   | -0.37 | 0.64  | -0.54 | 2.03  | 1.6   | 0.8   | 1.43  |       |       |       |       |   |

|                 |        |                                                                                      |                                                    |       |       |       |       |       |           |       |       |       |
|-----------------|--------|--------------------------------------------------------------------------------------|----------------------------------------------------|-------|-------|-------|-------|-------|-----------|-------|-------|-------|
| IMAGp998O04460  | CKS1B  | CDC28                                                                                | protein kinase regulatory subunit 1B (CKS1B), mRNA |       |       |       |       |       |           |       |       |       |
| NM_001826       | 1163   | 0.34                                                                                 | -0.51                                              | -0.41 | -1.44 | -0.45 | -0.8  | 0.71  | -0.44     | 0.52  | -     |       |
| 0.85            | -0.59  | -0.12                                                                                | 0.92                                               | 0.09  | 1.97  | 0.56  | 0.9   | 1.08  |           |       |       |       |
| IMAGp998N17408  | CLASP1 | Cytoplasmic linker associated protein 1                                              |                                                    |       |       |       |       |       |           |       |       |       |
| 23332           | -0.15  | -1.31                                                                                | -0.7                                               | -1.18 | -0.69 | -0.57 | 0.01  | -0.09 | -0.37     | -0.43 | -0.42 |       |
| 0.17            | -0.15  | -0.02                                                                                | 0.81                                               | 0.99  | 0.4   | 0.73  |       |       |           |       |       |       |
| IMAGp998A111865 | CMIP   | C-Maf-inducing protein                                                               |                                                    |       |       |       |       |       | 80790     | -0.61 | -0.57 | -0.29 |
| 0.5             | -0.52  | 0.24                                                                                 | -0.21                                              | -0.23 | 0.03  | -0.24 | -0.1  | 0.13  | 0.08      | 0.37  | 0.13  |       |
|                 | 0.4    | 0.64                                                                                 |                                                    |       |       |       |       |       |           |       |       |       |
| IMAGp998I24119  | CNIH   | cornichon homolog (Drosophila) (CNIH), mRNA                                          |                                                    |       |       |       |       |       |           |       |       |       |
| NM_005776       | 10175  | -0.51                                                                                | -0.18                                              | -0.34 | -0.33 | -0.01 | -0.7  | 0.13  | 0.16      | 0.08  |       |       |
|                 | 0.38   | 0.43                                                                                 | 1.1                                                | 0.02  | 0     | 0.72  | 0.6   | 0.3   | 1.39      |       |       |       |
| IMAGp998O061892 | CNIH   | Cornichon homolog (Drosophila)                                                       |                                                    |       |       |       |       |       | 10175     | 0.05  | -     |       |
| 0.11            | 0.06   | -0.37                                                                                | -0.52                                              | -0.11 | 0.12  | -0.17 | -0.18 | -0.1  | 0.36      | 0.07  | 0.14  |       |
|                 | 0.53   | 0.27                                                                                 | 0.2                                                | 0.62  |       |       |       |       |           |       |       |       |
| IMAGp998B221166 | COL2A1 | collagen, type V, alpha 2 (COL5A2), mRNA                                             |                                                    |       |       |       |       |       |           |       |       |       |
| NM_000393       |        | -0.45                                                                                | -0.27                                              | 0     | -0.31 | -0.43 | -0.46 | 0.49  | 0.18      | 0.57  |       |       |
|                 | 0.44   | 1.3                                                                                  | 0.96                                               | -0.22 | 0.2   | 0.74  | 0.5   | 0.5   | 0.95      |       |       |       |
| IMAGp998D18616  | COL8A1 | Collagen, type VIII, alpha 1                                                         |                                                    |       |       |       |       |       | 1295      | -0.09 | -     |       |
| 0.87            | -0.73  | -1.3                                                                                 | -1.21                                              | -1.38 | -0.47 | -0.65 | -0.21 | -0.06 | 0.46      | 0.48  | -0.25 |       |
|                 | 0.48   | 0.58                                                                                 | 0.7                                                | 1.22  |       |       |       |       |           |       |       |       |
| IMAGp998E152011 | COMMD8 | COMM domain containing 8 (COMMD8), mRNA                                              |                                                    |       |       |       |       |       |           |       |       |       |
| NM_017845       | 54951  | -0.44                                                                                | -0.77                                              | -0.08 | -0.86 | -0.14 | -0.53 | 0.59  | -0.01     | 0.61  |       |       |
|                 | 0.1    | 0.81                                                                                 | 0.2                                                | 0.33  | 0.45  | 1.24  | 0.22  | 0.8   | 0.79      |       |       |       |
| IMAGp998P02588  | COMMD8 | COMM domain containing 8 (COMMD8), mRNA                                              |                                                    |       |       |       |       |       |           |       |       |       |
| NM_017845       | 54951  | -0.95                                                                                | -0.32                                              | -0.69 | -0.54 | -0.41 | -1.21 | 0.02  | 0.3       | -0.02 |       |       |
|                 | 0.22   | 0.79                                                                                 | -0.03                                              | -0.05 | -0.04 | 0.79  | 0.97  | 0.5   | 1.1       |       |       |       |
| IMAGp998H03185  | COMMD8 | COMM domain containing 8 (COMMD8), mRNA                                              |                                                    |       |       |       |       |       |           |       |       |       |
| NM_017845       | 54951  | -0.91                                                                                | -0.55                                              | -0.71 | -0.81 | -0.29 | -0.69 | 0.32  | 0.25      | 0.11  |       |       |
|                 | 0.16   | 0.1                                                                                  | 0.31                                               | 0.13  | -0.17 | 0.91  | 0.63  | -0.1  | 1.06      |       |       |       |
| IMAGp998P221198 | COPS4  | COP9 constitutive photomorphogenic homolog subunit 4 (Arabidopsis) (COPS4), mRNA     |                                                    |       |       |       |       |       |           |       |       |       |
| NM_016129       | 51138  | -0.54                                                                                | -0.44                                              | -0.4  | -0.66 | -0.28 | -     |       |           |       |       |       |
| 1.58            | 0.35   | 0.03                                                                                 | 0.51                                               | -0.01 | 1.26  | 0.43  | 0.33  | -0.29 | 1.13      | 0.86  | 0.8   |       |
| IMAGp998N081962 | COPS5  | COP9 constitutive photomorphogenic homolog subunit 5 (Arabidopsis) (COPS5), mRNA     |                                                    |       |       |       |       |       |           |       |       |       |
| NM_006837       | 10987  | -0.16                                                                                | -0.66                                              | 0.25  | -0.62 | -0.33 | -     |       |           |       |       |       |
| 0.37            | 0.01   | -0.15                                                                                | 0.39                                               | 0.11  | 0.49  | 0.03  | 0.17  | 0.27  | 0.78      | 0.24  | 0     |       |
| IMAGp998K20869  | CPB1   | carboxypeptidase B1 (tissue) (CPB1), mRNA                                            |                                                    |       |       |       |       |       |           |       |       |       |
| NM_001871       |        | -0.57                                                                                | -0.21                                              | -0.31 | -0.72 | -0.5  | -1.3  | 0.2   | 0.03      | 0.17  | 0.02  |       |
|                 | 0.14   | 0.05                                                                                 | 0.79                                               | 0.35  | -0.2  | 1.24  |       |       |           |       |       |       |
| IMAGp998F152230 | CPZ    | Carboxypeptidase Z                                                                   |                                                    |       |       |       |       |       | 8532      | 0.2   | -0.66 | -0.34 |
| 0.55            | -0.41  | -0.93                                                                                | 0.68                                               | 0.23  | 1.09  | 0.62  | 1.14  | 0.82  | -0.02     | 0.07  | 0.8   |       |
|                 | 1.5    | 1.21                                                                                 |                                                    |       |       |       |       |       |           |       |       |       |
| IMAGp998F16559  | CREM   | cAMP responsive element modulator (CREM), transcript variant 2, mRNA                 |                                                    |       |       |       |       |       |           |       |       |       |
| NM_001881       | 1390   | -0.43                                                                                | -0.02                                              | -0.46 | -0.07 | -0.12 | -0.52 | -0.19 |           |       |       |       |
|                 | 0.09   | -0.1                                                                                 | 0.1                                                | 0.3   | 0.09  | 0     | -0.2  | 0.27  | 0.77      | 0.8   | 1.2   |       |
| IMAGp998I03669  | CRI2   | CREBBP/EP300 inhibitory protein 2 (CRI2), mRNA                                       |                                                    |       |       |       |       |       |           |       |       |       |
| NM_153232       | 163126 | -0.68                                                                                | -0.61                                              | -0.57 | -0.72 | -0.54 | -0.24 | -0.1  | -0.11     |       |       |       |
|                 | 0.3    | 0.16                                                                                 | 0.23                                               | 0.47  | 0.12  | -0.24 | 0.11  | -0.01 | 0         | -0.24 |       |       |
| IMAGp998H05688  | CRSP6  | cofactor required for Sp1 transcriptional activation, subunit 6, 77kDa (CRSP6), mRNA |                                                    |       |       |       |       |       |           |       |       |       |
| NM_004268       | 9440   | -0.96                                                                                | -0.28                                              | -0.54 | -0.32 | -     |       |       |           |       |       |       |
| 1.31            | -0.75  | 0.13                                                                                 | -0.21                                              | -0.52 | -0.1  | -0.34 | 0.27  | 0.03  | -0.1      | -0.05 | 0.4   |       |
|                 | 0.87   |                                                                                      |                                                    |       |       |       |       |       |           |       |       |       |
| IMAGp998L051781 | CRYAB  | crystallin, alpha B (CRYAB), mRNA                                                    |                                                    |       |       |       |       |       | NM_001885 | 1410  | -     |       |
| 0.85            | -0.88  | -2.4                                                                                 | -1.72                                              | -2.1  | -2.79 | -0.38 | -0.01 | -0.34 | 0.11      | -0.73 | 0.11  |       |
|                 | 0.12   | -0.63                                                                                | 0                                                  | -0.5  | -0.1  |       |       |       |           |       |       |       |

|                 |         |                                                                                |           |       |       |       |       |       |       |       |       |       |       |       |       |       |
|-----------------|---------|--------------------------------------------------------------------------------|-----------|-------|-------|-------|-------|-------|-------|-------|-------|-------|-------|-------|-------|-------|
| IMAGp998M074295 | CSDA    | cold shock domain protein A (CSDA), mRNA                                       | NM_003651 | -1.28 | -0.24 | -1.44 | -0.01 | -0.51 | -1.44 | 0.14  | 0.12  | -0.22 | -0.5  | -0.11 | 0.02  | -     |
|                 |         |                                                                                |           | 0.36  | 0.03  | 1.12  | 1.23  | 2.2   | 0.1   |       |       |       |       |       |       |       |
| IMAGp998I112690 | CSDA    | cold shock domain protein A (CSDA), mRNA                                       | NM_003651 | -0.82 | -0.75 | -0.53 | -0.92 | -0.59 | -0.97 | 0.23  | -0.03 | -0.39 | 0.29  | 1.32  | 0.47  | -     |
|                 |         |                                                                                |           | 0.05  | 0.8   | -0.07 | 0     | 0.4   | 0.31  |       |       |       |       |       |       |       |
| IMAGp998B18120  | CSE1L   | CSE1 chromosome segregation 1-like (yeast) (CSE1L), transcript variant 1, mRNA | NM_001316 | 1434  | -0.46 | -0.33 | -0.89 | -0.76 | -0.52 | -     |       |       |       |       |       |       |
|                 |         |                                                                                |           | 0.3   | 0.19  | -0.17 | -0.13 | -0.66 | -0.68 | -0.03 | 0.25  | -0.16 | 1.15  | 0.69  | 0.2   | 0.2   |
| IMAGp998C07117  | CSE1L   | CSE1 chromosome segregation 1-like (yeast) (CSE1L), transcript variant 1, mRNA | NM_001316 | 1434  | -0.73 | -0.35 | -1.17 | -0.72 | -0.65 | -     |       |       |       |       |       |       |
|                 |         |                                                                                |           | 1.1   | -0.05 | 0.21  | -0.52 | -0.03 | -0.07 | -0.04 | 0.16  | -0.3  | 1.2   | 1.21  | 0.2   | 0.81  |
| IMAGp998K242237 | CSE1L   | CSE1 chromosome segregation 1-like (yeast) (CSE1L), transcript variant 2, mRNA | NM_177436 | 1434  | -0.21 | -0.25 | -0.23 | -0.56 | -0.26 | -     |       |       |       |       |       |       |
|                 |         |                                                                                |           | 1.47  | 0.33  | 0.22  | 0.15  | -0.63 | 0.64  | 0.36  | 0.29  | 0.17  | 0.91  | 0.37  | 0     | 0.9   |
| IMAGp998B04827  | CSNK1A1 | casein kinase 1, alpha 1 (CSNK1A1), mRNA                                       | NM_001892 | 1452  | -0.72 | -0.47 | -0.57 | -0.74 | -0.44 | -0.99 | 0.04  | -0.29 | -0.18 | -     |       |       |
|                 |         |                                                                                |           | 0.39  | -0.05 | -0.09 | 0.03  | -0.11 | 0.97  | 0.63  | 0.2   | 0.02  |       |       |       |       |
| IMAGp998E132690 | CSNK1A1 | casein kinase 1, alpha 1 (CSNK1A1), mRNA                                       | NM_001892 | -1.12 | -0.23 | -0.66 | -0.61 | -0.3  | -1.03 | -0.03 | -0.08 | -0.17 | -     |       |       |       |
|                 |         |                                                                                |           | 0.06  | 0.39  | 0.24  | -0.15 | -0.01 | 0.59  | 0.61  | 0.3   | 1.32  |       |       |       |       |
| IMAGp998J01842  | CSNK2A2 | Casein kinase 2, alpha prime polypeptide                                       |           | 1459  | -0.86 | 0.11  | -0.92 | -0.22 | -0.35 | -0.61 | -0.06 | 0.02  | -0.43 | -0.26 | -0.48 | 0     |
|                 |         |                                                                                |           | -0.14 | -0.21 | 0.41  | 0.6   | 0.8   | 0.15  |       |       |       |       |       |       |       |
| IMAGp998P023938 | CUBN    | Cubilin (intrinsic factor-cobalamin receptor)                                  |           | 8029  | -0.6  | -0.27 | -0.41 | -0.44 | -0.43 | -0.16 | 0.2   | 0.07  | -0.3  | -0.12 | -0.51 |       |
|                 |         |                                                                                |           | 0.43  | 0.23  | 0     | 0.74  | 0.66  | 0.6   | 0.21  |       |       |       |       |       |       |
| IMAGp998M071199 | CUL2    | cullin 2 (CUL2), mRNA                                                          | NM_003591 | 8453  | -1.04 | -0.45 | -     |       |       |       |       |       |       |       |       |       |
|                 |         |                                                                                |           | 0.91  | -0.33 | -0.56 | -0.56 | -0.3  | 0.02  | 0.1   | -0.2  | -0.43 | 0.05  | -0.3  | -0.2  | 0.91  |
|                 |         |                                                                                |           |       | 1.16  | 1.6   | 0.88  |       |       |       |       |       |       |       |       |       |
| IMAGp998M091824 | CUTC    | CGI-32 protein (CGI-32), mRNA                                                  | NM_015960 | 51076 | -0.61 | -     |       |       |       |       |       |       |       |       |       |       |
|                 |         |                                                                                |           | 0.06  | -0.63 | -0.32 | -0.76 | -0.98 | -0.32 | -0.13 | -0.43 | -0.01 | 0.45  | 0.17  | 0.02  | -     |
|                 |         |                                                                                |           | 0.27  | 0.51  | 0.57  | 0.6   | 1.05  |       |       |       |       |       |       |       |       |
| IMAGp998H221208 | DAP     | Death-associated protein                                                       |           | 1611  | -0.43 | -0.55 | -     |       |       |       |       |       |       |       |       |       |
|                 |         |                                                                                |           | 0.38  | -0.63 | -0.1  | -0.42 | -0.07 | -0.33 | -0.5  | -0.81 | 0.07  | -0.16 | 0     | 0.25  | 0.85  |
|                 |         |                                                                                |           |       | 0.56  | 0     | 0.4   |       |       |       |       |       |       |       |       |       |
| IMAGp998G23609  | DBC1    | deleted in bladder cancer 1 (DBC1), mRNA                                       | NM_014618 | -1.08 | 0.11  | -1.02 | -0.49 | -0.48 | -0.39 | 0.18  | 0.08  | -0.47 | 0.07  | -1.33 | -0.25 |       |
|                 |         |                                                                                |           | 0.14  | -0.51 | 1.57  | 1.58  | 1.4   | 1.32  |       |       |       |       |       |       |       |
| IMAGp998P16471  | DCTN6   | dynactin 6 (DCTN6), mRNA                                                       | NM_006571 | 10671 | -0.58 | -     |       |       |       |       |       |       |       |       |       |       |
|                 |         |                                                                                |           | 0.24  | -0.25 | -0.53 | 0.02  | 0.11  | 0.33  | 0.08  | 0     | -0.02 | -0.19 | 0.24  | 0.36  | -0.44 |
|                 |         |                                                                                |           |       | 1.28  | 0.77  | 1.3   | 0.5   |       |       |       |       |       |       |       |       |
| IMAGp998M161165 | DDAH2   | dimethylarginine dimethylaminohydrolase 2 (DDAH2), mRNA                        | NM_013974 | 23564 | -0.65 | -0.29 | -0.89 | -0.55 | -0.68 | -0.96 | -0.26 | 0.04  | -0.49 | -     |       |       |
|                 |         |                                                                                |           | 0.03  | 0.41  | 0.33  | -0.09 | -0.16 | 0.72  | 0.77  | -0.3  | 0.94  |       |       |       |       |
| IMAGp998L1187   | DDR2    | Discoidin domain receptor family, member 2                                     |           | 4921  | -0.3  | -0.35 | -0.08 | -0.34 | -0.33 | -0.09 | -0.06 | -0.05 | 0.01  | -0.13 | 0.14  |       |
|                 |         |                                                                                |           | 0.24  | 0.1   | -0.27 | 1.15  | 1.12  | 0.3   | 1.12  |       |       |       |       |       |       |
| IMAGp998L111745 | DDX18   | DEAD (Asp-Glu-Ala-Asp) box polypeptide 18 (DDX18), mRNA                        | NM_006773 | 8886  | -0.53 | -0.31 | -0.69 | -0.63 | -0.29 | -1.73 | -0.25 | -0.48 | -0.31 | -     |       |       |
|                 |         |                                                                                |           | 0.32  | 0.42  | -0.07 | 0.11  | -0.3  | 0.98  | 0.85  | 0.7   | 0.55  |       |       |       |       |
| IMAGp998D06520  | DDX24   | DEAD (Asp-Glu-Ala-Asp) box polypeptide 24 (DDX24), mRNA                        | NM_020414 | 57062 | -0.78 | -0.53 | -0.72 | -0.65 | -0.79 | 0.04  | -0.18 | -0.33 | -0.5  | -     |       |       |
|                 |         |                                                                                |           | 0.27  | -0.57 | -0.39 | 0.1   | -0.25 | 0.81  | 0.74  | 0.2   | 0.49  |       |       |       |       |
| IMAGp998J221857 | DDX42   | DEAD (Asp-Glu-Ala-Asp) box polypeptide 42 (DDX42), mRNA                        | NM_007372 | 11325 | -0.59 | -0.33 | -0.29 | -0.62 | -0.38 | -0.62 | 0.21  | -0.38 | 0.34  | -     |       |       |
|                 |         |                                                                                |           | 0.09  | -0.18 | -0.11 | -0.05 | 0.42  | 0.67  | 0.08  | 0     | 0.91  |       |       |       |       |





|                 |         |                                                                                         |           |       |       |       |       |       |       |       |       |       |      |
|-----------------|---------|-----------------------------------------------------------------------------------------|-----------|-------|-------|-------|-------|-------|-------|-------|-------|-------|------|
| IMAGp998K191725 | EIF1AY  | Eukaryotic translation initiation factor 1A (EIF1A), mRNA                               | NM_001412 | 1964  | -1.1  | 0.04  | -1    | -0.4  | 0.01  | -1.32 | 0.12  |       |      |
|                 |         |                                                                                         |           |       | 0.44  | -0.36 | -0.07 | 0.44  | 0.41  | 0.03  | -0.35 | 1.19  |      |
|                 |         |                                                                                         |           |       |       |       |       |       | 1.4   | 0.7   | 1.62  |       |      |
| IMAGp998O19880  | EIF1AY  | Eukaryotic translation initiation factor 1A, Y-linked (EIF1AY), mRNA                    | NM_004681 |       |       |       |       | -0.43 | -0.54 | -0.6  | -0.56 | -0.03 |      |
|                 |         |                                                                                         |           |       | 0.36  | 0.19  | 0.05  | -0.06 | 0.27  | 0.47  | 0.42  | 0.29  |      |
|                 |         |                                                                                         |           |       |       |       |       |       | 0.68  | 0.29  | 2.7   | 0.5   |      |
| IMAGp998E092615 | EIF1AY  | Eukaryotic translation initiation factor 1A (EIF1A), mRNA                               | NM_001412 |       |       |       |       | -0.67 | -0.57 | -0.65 | -0.84 | -0.36 |      |
|                 |         |                                                                                         |           |       | 0.03  | -0.01 | -0.21 | 0.04  | 0.87  | 0.14  | 0.09  | 1.22  |      |
|                 |         |                                                                                         |           |       |       |       |       |       | 0.47  | 0     | 0.66  |       |      |
| IMAGp998N1995   | EIF2B1  | Eukaryotic translation initiation factor 2B, subunit 1 alpha, 26kDa (EIF2B1), mRNA      | NM_001414 | 1967  | -1.08 | -0.74 | -1.19 | -0.82 | -0.92 | -0.91 | -0.05 | -0.17 |      |
|                 |         |                                                                                         |           |       |       |       |       | -0.42 | -0.54 | -0.77 | -0.24 | 0.03  |      |
|                 |         |                                                                                         |           |       | 0.2   | 0.22  |       |       |       |       | -0.11 | 0.68  |      |
|                 |         |                                                                                         |           |       |       |       |       |       |       |       | 0.64  | -     |      |
| IMAGp998C1585   | EIF2B1  | Eukaryotic translation initiation factor 2B, subunit 1 alpha, 26kDa (EIF2B1), mRNA      | NM_001414 | 1967  | -0.57 | -0.45 | -0.99 | -0.69 | -0.52 | -1.14 | -0.24 | -0.09 |      |
|                 |         |                                                                                         |           |       |       |       |       | -0.46 | -0.37 | 0.69  | -0.3  | -0.07 |      |
|                 |         |                                                                                         |           |       |       |       |       |       |       | -0.04 | 0.54  | 0.59  |      |
|                 |         |                                                                                         |           |       | 0.2   | 0.56  |       |       |       |       |       | -     |      |
| IMAGp998I05460  | EIF2S1  | Eukaryotic translation initiation factor 2, subunit 1 alpha, 35kDa (EIF2S1), mRNA       | NM_004094 | 1965  | -0.71 | -0.46 | -0.76 | -0.55 | -0.75 | -0.37 | -0.05 | -0.15 |      |
|                 |         |                                                                                         |           |       |       |       |       | -0.36 | -0.57 | -1.14 | -0.26 | 0.27  |      |
|                 |         |                                                                                         |           |       |       |       |       |       |       |       | -0.3  | 0.75  |      |
|                 |         |                                                                                         |           |       | 0.1   | 0.53  |       |       |       |       | 0.89  |       |      |
| IMAGp998G13174  | EIF2S2  | Eukaryotic translation initiation factor 2, subunit 2 beta, 38kDa (EIF2S2), mRNA        | NM_003908 |       |       |       |       |       |       |       | -2.1  | -0.06 |      |
|                 |         |                                                                                         |           |       | 0.25  | -0.3  | -2.24 | -0.19 | 0.15  | -1.14 | -0.85 | 0.03  | 0.05 |
|                 |         |                                                                                         |           |       |       |       |       |       |       |       | 0.36  | -0.78 |      |
|                 |         |                                                                                         |           |       |       |       |       |       |       |       | 1.24  | 1.63  |      |
|                 |         |                                                                                         |           |       | 2.3   | 1.84  |       |       |       |       |       |       |      |
| IMAGp998I06123  | EIF3S10 | Eukaryotic translation initiation factor 3, subunit 10 theta, 150/170kDa (EIF3S10), mRN | NM_003750 | 8661  | -0.47 | -1.03 | -     | 0.38  | -1.16 | -0.23 | -0.48 | 0.18  |      |
|                 |         |                                                                                         |           |       |       |       |       | -0.25 | -0.3  | -0.61 | -0.61 | -0.15 |      |
|                 |         |                                                                                         |           |       |       |       |       |       |       |       | 0.07  | 0.08  |      |
|                 |         |                                                                                         |           |       | 0.62  | 1     | 0.31  |       |       |       | 1.32  |       |      |
| IMAGp998G232574 | EIF3S6  | Eukaryotic translation initiation factor 3, subunit 6 48kDa (EIF3S6), mRNA              | NM_001568 | 3646  | -0.54 | -0.98 | -0.42 | -0.29 | -0.95 | 0.03  | 0.2   | -0.08 |      |
|                 |         |                                                                                         |           |       |       |       |       | 0.31  | 1.38  | 0.32  | 0.18  | -0.05 |      |
|                 |         |                                                                                         |           |       |       |       |       |       |       | 1.1   | 0.97  | 0.8   |      |
|                 |         |                                                                                         |           |       | 0.36  |       |       |       |       |       |       |       |      |
| IMAGp998L11138  | EIF3S6  | Eukaryotic translation initiation factor 3, subunit 6 48kDa (EIF3S6), mRNA              | NM_001568 | 3646  | -1.71 | -0.23 | -1.42 | -0.02 | -2.33 | 0     | 0.2   | -0.16 |      |
|                 |         |                                                                                         |           |       |       |       |       | -2.17 | 0.9   | 0.69  | 0.09  | -0.21 |      |
|                 |         |                                                                                         |           |       |       |       |       |       |       |       | 1.27  | 1.33  |      |
|                 |         |                                                                                         |           |       | 2.8   | 0.89  |       |       |       |       |       |       |      |
| IMAGp998D122580 | EIF3S9  | Eukaryotic translation initiation factor 3, subunit 9 eta, 116kDa                       | 8662      | -0.18 | -0.29 | -0.35 | -0.59 | 0.04  | -0.4  | -0.21 | 0.65  | 0.02  |      |
|                 |         |                                                                                         |           |       |       |       |       | 0.18  | -0.25 | 0.91  | 0.68  | 0.5   |      |
|                 |         |                                                                                         |           |       |       |       |       |       |       | 0.67  |       |       |      |
| IMAGp998D195602 | EIF4A1  | Eukaryotic translation initiation factor 4A, isoform 1 (EIF4A1), mRNA                   | NM_001416 |       |       |       |       | -0.62 | -0.35 | -0.46 | -0.2  | 0.19  |      |
|                 |         |                                                                                         |           |       | 1.5   | 0.71  | -0.18 | 0.35  | -1.42 | -0.37 | 0.24  | 0.89  |      |
|                 |         |                                                                                         |           |       |       |       |       |       |       | 0.92  | 1.56  | 0.52  |      |
|                 |         |                                                                                         |           |       |       |       |       |       |       |       | 1.8   | 0.23  |      |
| IMAGp998N09644  | EIF4E   | Eukaryotic translation initiation factor 4E (EIF4E), mRNA                               | NM_001968 | 1977  | -0.59 | 0.05  | -0.34 | -0.47 | -0.19 | 0.47  | -0.2  | 0.63  |      |
|                 |         |                                                                                         |           |       |       |       |       |       |       |       | 0.48  | 0.5   |      |
|                 |         |                                                                                         |           |       |       |       |       |       |       |       | 0.73  |       |      |
| IMAGp998N09597  | EIF4G2  | Eukaryotic translation initiation factor 4 gamma, 2 (EIF4G2), mRNA                      | NM_001418 | 1982  | -0.17 | -1.05 | -0.11 | -1.02 | -0.24 | -0.39 | 0.06  | 0.02  |      |
|                 |         |                                                                                         |           |       |       |       |       |       |       |       | -0.51 | -0.28 |      |
|                 |         |                                                                                         |           |       |       |       |       |       |       |       | 0.54  | -     |      |
|                 |         |                                                                                         |           |       | 0.24  | -0.39 | 0.06  | -0.49 | -0.18 | 0.08  | 0.2   | 1.36  |      |
|                 |         |                                                                                         |           |       |       |       |       |       |       | 0.92  | 0.4   | 0.94  |      |
| IMAGp998B052036 | EIF4G3  | Eukaryotic translation initiation factor 4 gamma, 3 (EIF4G3), mRNA                      | NM_003760 | 8672  | -0.51 | -0.6  | -0.82 | -0.04 | -0.04 | -0.01 | 0.09  | 0.29  |      |
|                 |         |                                                                                         |           |       |       |       |       |       |       |       | -0.09 | 0.14  |      |
|                 |         |                                                                                         |           |       |       |       |       |       |       |       | 0.88  | 0.74  |      |
|                 |         |                                                                                         |           |       |       |       |       |       |       |       | 0.8   | -0.37 |      |
| IMAGp998F24110  | EIF5    | Eukaryotic translation initiation factor 5                                              | NM_183004 | 1983  | -1.03 | -0.22 | -0.9  | -0.76 | -0.02 | -0.1  | -0.1  | -0.12 |      |
|                 |         |                                                                                         |           |       |       |       |       |       |       |       | 1.05  | 0.82  |      |
|                 |         |                                                                                         |           |       |       |       |       |       |       |       | 0.3   | 1.24  |      |

|                 |          |                                                                                              |           |       |       |       |       |       |       |       |
|-----------------|----------|----------------------------------------------------------------------------------------------|-----------|-------|-------|-------|-------|-------|-------|-------|
| IMAGp998J176053 | EIF5     | Eukaryotic translation initiation factor 5 (EIF5), transcript variant 2, mRNA                | NM_183004 | 1983  | -1.76 | -0.11 | -1.69 | -0.14 | 0.01  | -     |
|                 |          |                                                                                              |           |       | 2.48  | -0.43 | -0.28 | -0.73 | -1.16 | 0.18  |
|                 |          |                                                                                              |           |       | 0.03  | 0.02  | -0.19 | 1.04  | 1.08  | 1.5   |
| IMAGp998F12617  | EIF5B    | Eukaryotic translation initiation factor 5B (EIF5B), mRNA                                    | NM_015904 | 9669  | -1.46 | -0.45 | -1.28 | -0.71 | -0.74 | -0.59 |
|                 |          |                                                                                              |           |       | 0.37  | -0.81 | 0.11  | -0.04 | -0.47 | 1.08  |
|                 |          |                                                                                              |           |       | 0.95  | 0.6   | 0.53  |       |       |       |
| IMAGp998G09198  | ELAVL1   | ELAV (embryonic lethal, abnormal vision, Drosophila)-like 1 (Hu antigen R) (ELAVL1), mR      | NM_001419 | 1994  | -0.45 | -0.78 | -     |       |       |       |
|                 |          |                                                                                              |           |       | 0.46  | -1.25 | -0.88 | -0.73 | 0.68  | -0.43 |
|                 |          |                                                                                              |           |       | 0.11  | -0.54 | -0.73 | 0.05  | -0.05 | 0.27  |
|                 |          |                                                                                              |           |       | 0.49  | 0.7   | -0.07 |       |       |       |
| IMAGp998A17115  | ELOVL6   | ELOVL family member 6, elongation of long chain fatty acids (FEN1/Elo2, SUR4/Elo3-like, mRNA | NM_024090 | 79071 | -1    | 0.32  | -0.53 | -     |       |       |
|                 |          |                                                                                              |           |       | 0.18  | -0.4  | -2.02 | 0.14  | 0.16  | 0.13  |
|                 |          |                                                                                              |           |       | -0.06 | 0.26  | -0.4  | -0.29 | 0.14  | 0.79  |
|                 |          |                                                                                              |           |       | 1.7   | 1.65  |       |       |       |       |
| IMAGp998N094083 | EML5     | Echinoderm microtubule associated protein like 5 (EML5), mRNA                                | NM_183387 |       | -0.98 | -0.59 | -1.31 | -0.13 | -0.47 | -1.13 |
|                 |          |                                                                                              |           |       | 0.19  | 0.46  | -0.17 | 0     | -0.55 | 0.65  |
|                 |          |                                                                                              |           |       | 0.88  | 1.2   | 1.15  |       |       |       |
| IMAGp998D02121  | ENAH     | Enabled homolog (Drosophila)                                                                 |           | 55740 | -0.26 | -0.6  | -     |       |       |       |
|                 |          |                                                                                              |           |       | 0.3   | -0.8  | -0.22 | -0.28 | -0.23 | -0.34 |
|                 |          |                                                                                              |           |       | 1.22  | 0.8   | 1.76  |       |       |       |
| IMAGp998F161945 | ENAH     | Enabled homolog (Drosophila) (ENAH), mRNA                                                    | NM_018212 |       |       |       |       |       |       |       |
|                 |          |                                                                                              |           |       | 55740 | -0.73 | 0.06  | -0.68 | 0.09  | -0.23 |
|                 |          |                                                                                              |           |       | 0.21  | 0.64  | 2.44  | 1.54  | 0.52  | 0.4   |
|                 |          |                                                                                              |           |       | 0.78  |       |       |       |       |       |
| IMAGp998O01880  | ENPP2    | ectonucleotide pyrophosphatase/phosphodiesterase 2 (autotaxin) (ENPP2), mRNA                 | NM_006209 |       | 0.18  | -0.57 | -0.14 | -1.16 | -0.89 | -     |
|                 |          |                                                                                              |           |       | 0.31  | 0.54  | 0.35  | -0.06 | -0.61 | -0.45 |
|                 |          |                                                                                              |           |       | -0.06 | -0.06 | 0.45  | -0.17 | 1.27  | 0.86  |
|                 |          |                                                                                              |           |       | 0.3   | 0.95  |       |       |       |       |
| IMAGp998P081906 | ENTH     | Enthoprotin                                                                                  |           | 9685  | -0.72 | -0.16 | -0.8  | -0.2  | -0.95 | -1    |
|                 |          |                                                                                              |           |       | -0.21 | 0.27  | -0.35 | 0.17  | -0.11 | 0.19  |
|                 |          |                                                                                              |           |       | 0.27  | -0.19 | 0.03  | 0.49  | 0.7   | 0.1   |
| IMAGp998B101678 | ENTPD5   | ectonucleoside triphosphate diphosphohydrolase 5 (ENTPD5), mRNA                              | NM_001249 |       | -0.95 | -0.49 | -1.11 | -0.58 | -0.46 | -0.62 |
|                 |          |                                                                                              |           |       | 0.15  | 0.07  | -0.5  | -0.25 | -0.38 | 0.23  |
|                 |          |                                                                                              |           |       | -0.26 | 0.49  | 0.2   | 0     | -0.17 |       |
| IMAGp998A09330  | EXOSC7   | KIAA0116 protein (KIAA0116), mRNA                                                            | NM_015004 |       |       |       |       |       |       |       |
|                 |          |                                                                                              |           |       | -1.04 | -0.25 | -1    | -0.21 | -0.61 | -1.15 |
|                 |          |                                                                                              |           |       | 0.16  | -0.25 | 0.49  | 0.65  | 0.2   | 0.63  |
| IMAGp998J21439  | FAM18B   | family with sequence similarity 18, member B (FAM18B), mRNA                                  | NM_016078 | 51030 | -1.01 | -0.15 | -0.2  | -1.65 | -0.3  | -1.28 |
|                 |          |                                                                                              |           |       | 0.22  | 0.14  | -0.34 | 0.79  | 0.07  | 0.13  |
|                 |          |                                                                                              |           |       | -0.03 | 1.1   | 0.31  | 0     | 1.05  |       |
| IMAGp998L1581   | FAM3C    | family with sequence similarity 3, member C (FAM3C), mRNA                                    | NM_014888 |       | -0.71 | -0.39 | -0.51 | -0.8  | -0.49 | -0.51 |
|                 |          |                                                                                              |           |       | 0.51  | -0.53 | -0.08 | 0.01  | -0.08 | 0.87  |
|                 |          |                                                                                              |           |       | 0.52  | 1.7   | 0.85  |       |       |       |
| IMAGp998C151203 | FBXO18   | F-box only protein, helicase, 18 (FBXO18), transcript variant 2, mRNA                        | NM_178150 | 84893 | -0.85 | -0.57 | -0.89 | -0.48 | 0.01  |       |
|                 |          |                                                                                              |           |       | 0.19  | -0.37 | -0.26 | -0.16 | -0.23 | 0.02  |
|                 |          |                                                                                              |           |       | 0.65  | -0.23 | -0.18 | -0.01 | 0.75  | 1.07  |
|                 |          |                                                                                              |           |       | 0.8   |       |       |       |       |       |
| IMAGp998L211112 | FH       | fumarate hydratase (FH), nuclear gene encoding mitochondrial protein, mRNA                   | NM_000143 | 2271  | -1    | -0.25 | -1.4  | -0.57 | -0.68 | -     |
|                 |          |                                                                                              |           |       | 1.03  | -0.3  | 0.32  | -0.7  | -0.05 | 0.38  |
|                 |          |                                                                                              |           |       | 0.19  | 0     | -0.49 | 0.45  | 0.83  | 0.4   |
|                 |          |                                                                                              |           |       | 0.44  |       |       |       |       |       |
| IMAGp998C12920  | FKBP14   | FK506 binding protein 14, 22 kDa (FKBP14), mRNA                                              | NM_017946 |       | -0.27 | -0.86 | -0.69 | -1.02 | -1.09 | -0.14 |
|                 |          |                                                                                              |           |       | 0.35  | -0.54 | -0.08 | -0.15 | -0.12 | 0.63  |
|                 |          |                                                                                              |           |       | 0.71  | 0.9   | -0.08 |       |       |       |
| IMAGp998O04567  | FLJ13273 | Hypothetical protein FLJ13273                                                                |           | 79807 | -0.23 | -     |       |       |       |       |
|                 |          |                                                                                              |           |       | 0.33  | -0.36 | -0.73 | -0.03 | -0.58 | 0.12  |
|                 |          |                                                                                              |           |       | -0.2  | 0.25  | -0.29 | -0.17 | 0.11  | -0.03 |
|                 |          |                                                                                              |           |       | 0.33  | 0.15  | 0.8   | 1.06  |       |       |
| IMAGp998B17411  | FLJ21628 | Zinc finger protein 2 homolog (mouse)                                                        |           |       |       |       |       |       |       |       |
|                 |          |                                                                                              |           |       | 80108 | -1.13 | -0.96 | -1.25 | -0.89 | -1.64 |
|                 |          |                                                                                              |           |       | 0.03  | 0.04  | -0.17 | 1.06  | 0.97  | 1.3   |
|                 |          |                                                                                              |           |       | 1.71  |       |       |       |       |       |

|                 |           |                                                                                          |           |        |       |
|-----------------|-----------|------------------------------------------------------------------------------------------|-----------|--------|-------|
| IMAGp998M11730  | FLJ21908  | hypothetical protein FLJ21908                                                            | 79657     | -1.4   | -     |
| 0.51            | -1.12     | -0.58                                                                                    | -0.32     | -1.92  | -0.08 |
|                 | 0.08      | 0.11                                                                                     | 0.21      | 1.13   | 0.6   |
|                 | 0.05      | -0.25                                                                                    |           |        |       |
|                 | 0.62      | 0.8                                                                                      | 0.3       | 1.34   |       |
| IMAGp998J20124  | FLJ37953  | Hypothetical protein FLJ37953                                                            | 129450    | -      |       |
| 0.12            | 0.01      | -0.43                                                                                    | -0.02     | -0.74  | -0.48 |
|                 | 0.18      | 0.46                                                                                     | 0.19      | 1.7    | 0.9   |
| IMAGp998D09822  | FN1       | Fibronectin 1 (FN1), transcript variant 1, mRNA                                          |           |        |       |
|                 | NM_002026 |                                                                                          | 0.04      | -0.47  | 0.07  |
|                 | 0.03      | 0.26                                                                                     | 0.51      | -0.13  | 0.45  |
| IMAGp998B18778  | FN1       | Fibronectin 1 (FN1), transcript variant 1, mRNA                                          |           |        |       |
|                 | NM_002026 |                                                                                          | 2335      | -0.33  | -0.27 |
|                 | 0.59      | 0.35                                                                                     | -0.28     | 0.66   | 0.77  |
| IMAGp998J10666  | FRDA      | Friedreich ataxia (FRDA), nuclear gene encoding mitochondrial protein, transcript varia  | NM_000144 | 2395   | -0.37 |
|                 |           |                                                                                          |           | -0.54  | -0.41 |
| 0.43            | -0.4      | -1.15                                                                                    | -0.11     | -0.2   | -0.56 |
|                 | 0.2       | 0.56                                                                                     | -0.31     | 0.38   | -0.14 |
|                 |           |                                                                                          | 0.17      | -0.31  | 0.17  |
|                 |           |                                                                                          |           |        | 0.43  |
| IMAGp998C21621  | FTH1      | ferritin, heavy polypeptide 1 (FTH1), mRNA                                               |           |        |       |
|                 | NM_002032 |                                                                                          | 0.05      | -0.49  | -0.43 |
|                 | 0.02      | 0.66                                                                                     | 0.18      | 0.16   | -0.06 |
| IMAGp998A061009 | FXR1      | fragile X mental retardation, autosomal homolog 1 (FXR1), mRNA                           | NM_005087 | 8087   | -1.11 |
|                 |           |                                                                                          |           | -0.56  | -0.76 |
|                 | 0.28      | 0.27                                                                                     | 0.25      | 0.2    | 0.29  |
| IMAGp998L09972  | FXD5      | FXD domain containing ion transport regulator 5 (FXD5), mRNA                             | NM_014164 | 53827  | -0.48 |
|                 |           |                                                                                          |           | -0.07  | -0.7  |
|                 | 0.27      | -0.01                                                                                    | -0.14     | 0.57   | -0.14 |
| IMAGp998P14697  | GADD45A   | growth arrest and DNA-damage-inducible, alpha (GADD45A), mRNA                            | NM_001924 | 1647   | -1.22 |
|                 |           |                                                                                          |           | -0.73  | -1    |
|                 | 0.2       | -0.09                                                                                    | -0.17     | 0.53   | 0.24  |
| IMAGp998E23478  | GAPD      | glyceraldehyde-3-phosphate dehydrogenase (GAPD), mRNA                                    | NM_002046 | 2597   | -0.33 |
|                 |           |                                                                                          |           | -0.45  | -0.02 |
| 0.06            | 0.37      | -0.01                                                                                    | 0.2       | 0.29   | 1.04  |
| IMAGp998G034013 | GBAS      | glioblastoma amplified sequence (GBAS), mRNA                                             | NM_001483 | 2631   | -0.32 |
|                 |           |                                                                                          |           | -0.38  | -0.17 |
|                 | 0.41      | 0.94                                                                                     | 0.99      | 0.03   | -0.03 |
| IMAGp998J10115  | GBE1      | glucan (1,4-alpha-), branching enzyme 1 (glycogen branching enzyme, Andersen disease, g  | NM_000158 | 2632   | -0.5  |
|                 |           |                                                                                          |           | -0.92  | -0.36 |
| 1.14            | 0         | -0.24                                                                                    | 0.46      | -0.11  | -0.29 |
|                 | 0.5       | 0.9                                                                                      | -0.48     | -0.48  | -0.02 |
|                 |           |                                                                                          | 0.38      | 0.96   | 0.36  |
| IMAGp998A201924 | GBF1      | golgi-specific brefeldin A resistance factor 1 (GBF1), mRNA                              | NM_004193 |        |       |
|                 |           |                                                                                          | -0.72     | -0.95  | -1.12 |
| 0.48            | -0.1      | 0.23                                                                                     | 0.05      | 0.07   | 1.17  |
| IMAGp998N06536  | GLDC      | "glycine dehydrogenase (decarboxylating; glycine decarboxylase, glycine cleavage system" | NM_000170 | 220758 | -0.34 |
|                 |           |                                                                                          |           | -0.55  | -     |
| 0.11            | -0.25     | -0.92                                                                                    | -0.15     | -0.14  | -0.09 |
|                 | 0.43      | 1                                                                                        | 0.59      | 0.15   | -0.11 |
| IMAGp998A112009 | GMNN      | geminin, DNA replication inhibitor (GMNN), mRNA                                          | NM_015895 |        |       |
|                 |           |                                                                                          | -1.14     | -0.57  | -1.39 |
| 0.75            | 0.1       | 0.39                                                                                     | 0.16      | -0.31  | 0.53  |
| IMAGp998F05227  | GNG10     | guanine nucleotide binding protein (G protein), gamma 10 (GNG10), mRNA                   | NM_004125 |        |       |
|                 |           |                                                                                          | -0.41     | -0.49  | 0.17  |
|                 | 0.02      | 0.56                                                                                     | 0.16      | 0.15   | 0.84  |
| IMAGp998I191962 | GNG10     | guanine nucleotide binding protein (G protein), gamma 10 (GNG10), mRNA                   | NM_004125 | 2790   | -0.32 |
|                 |           |                                                                                          |           | -0.61  | 0.18  |
|                 | 0.09      | 0.49                                                                                     | 0.21      | 1.04   | 1.05  |
| IMAGp998F10393  | GNG12     | Guanine nucleotide binding protein (G protein), gamma 12                                 | 55970     | -0.16  | -0.45 |
|                 |           |                                                                                          |           | 0.03   | -0.44 |
|                 | 0.46      | 0.01                                                                                     | -0.04     | 0.07   | 1.44  |
|                 |           |                                                                                          | 1.05      | 0.6    | 0.91  |

|                 |        |                                                                              |           |        |       |       |       |       |       |       |       |       |       |       |       |       |       |       |      |       |       |       |
|-----------------|--------|------------------------------------------------------------------------------|-----------|--------|-------|-------|-------|-------|-------|-------|-------|-------|-------|-------|-------|-------|-------|-------|------|-------|-------|-------|
| IMAGp998I01473  | GOLGA4 | golgi autoantigen, golgin subfamily a, 4 (GOLGA4), mRNA                      | NM_002078 | -0.32  | -0.13 | -0.31 | -0.61 | -0.25 | 0.01  | 0.06  | -0.26 | -0.01 | -0.12 | -0.39 | -0.07 | 0.12  | 0.02  | 0.4   | 0.64 | 0     | 0.17  |       |
| IMAGp998D10228  | GOLPH4 | Golgi phosphoprotein 4                                                       |           | 27333  | -0.77 | -0.26 | -0.35 | -0.56 | -0.34 | -0.88 | 0.3   | 0.13  | -0.33 | -0.3  | -0.08 | -0.03 | -0.3  | 0.12  | 0.55 | 0.14  | 0.7   | 0.83  |
| IMAGp998L215632 | GPR143 | G protein-coupled receptor 143 (GPR143), mRNA                                | NM_000273 | 4935   | -0.44 | -0.06 | -0.36 | -0.28 | -0.06 | -0.69 | 0.24  | 0.15  | 0.14  | -0.19 | -0.1  | 0.52  | -0.03 | 0.07  | 0.36 | 0.44  | 0     | 0.73  |
| IMAGp998A01737  | GSDML  | gasdermin-like (GSDML), mRNA                                                 | NM_018530 |        | -0.36 | -0.23 | -0.19 | -0.71 | -0.34 | -0.28 | 0.08  | -0.17 | -0.18 | 0.19  | -0.5  | 0.05  | 0.18  | 0.05  | 1.33 | 0.71  | 0.6   | 1.14  |
| IMAGp998J232973 | GSK3B  | glycogen synthase kinase 3 beta (GSK3B), mRNA                                | NM_002093 | 2932   | -1.41 | -0.12 | -1.48 | -0.25 | -0.63 | -1.36 | -0.39 | 0.24  | -0.19 | 0.05  | 0     | -0.19 | -0.42 | -0.41 | 0.13 | 0.89  | 0.6   | 0.33  |
| IMAGp998O19844  | GSPT2  | G1 to S phase transition 2 (GSPT2), mRNA                                     | NM_018094 | 23708  | -1.22 | -0.29 | -1.1  | -0.58 | -1.01 | -1.15 | 0.14  | 0.14  | -0.32 | 0.14  | 0.1   | 0.12  | 1.31  | 1.39  | 0.8  | 1.69  | 0.14  | 0.51  |
| IMAGp998N06732  | GTF2A2 | general transcription factor IIA, 2 (12kD subunit) (GTF2A2), mRNA            | NM_004492 | 2958   | -0.15 | -0.64 | 0.06  | -0.91 | -0.05 | -0.06 | 0.32  | -0.11 | 0.14  | -0.45 | 0.17  | 0     | 0.35  | 0     | 1.31 | 0.73  | 0.2   | 0.78  |
| IMAGp998B241781 | GTF2H2 | general transcription factor IIH, polypeptide 2, 44kDa (GTF2H2), mRNA        | NM_001515 |        | -0.51 | -0.59 | -0.04 | -0.35 | -0.4  | -0.6  | 0.22  | -0.28 | 0.02  | -0.36 | -0.07 | -0.31 | 0.22  | -0.29 | 0.8  | 0.62  | -0.2  | 0.73  |
| IMAGp998G04445  | GUCA1A | guanylate cyclase activator 1A (retina) (GUCA1A), mRNA                       | NM_000409 |        | -0.36 | -1.08 | -0.26 | -1.17 | -0.66 | -0.96 | 0.33  | -0.46 | 0.76  | 0.41  | -0.16 | 0.45  | -0.07 | 0.51  | 0.96 | 0.13  | 0.1   | 0.6   |
| IMAGp998L231200 | H3F3A  | H3 histone, family 3B (H3.3B) (H3F3B), mRNA                                  | NM_005324 |        | -0.1  | -0.9  | -0.2  | -1.06 | -0.83 | -0.9  | 0.26  | -0.39 | -0.59 | 0.51  | 0.07  | -0.63 | 0.3   | 0.09  | 1.33 | 0.72  | 0.3   | 0.49  |
| IMAGp998M14201  | H63    | H63 breast cancer expressed gene (H63), transcript variant 2, mRNA           | NM_177974 | 113201 | -0.41 | -0.6  | 0.02  | -0.85 | 0.28  | -0.06 | 0.01  | 0.2   | 0.68  | 0.17  | 0.8   | 0.7   | -0.03 | 0.24  | 1.46 | 0.79  | 1.4   | 0.58  |
| IMAGp998I0375   | HAT1   | histone acetyltransferase 1 (HAT1), mRNA                                     | NM_003642 | 8520   | -1.7  | -0.33 | -2.19 | 0.35  | -1.26 | -1.05 | 0.21  | 0.14  | -0.28 | -0.21 | 0.36  | -0.46 | 0.98  | 1.04  | 0.6  | 0.68  | 0.21  | 0.52  |
| IMAGp998G141793 | HDAC2  | histone deacetylase 2 (HDAC2), mRNA                                          | NM_001527 | 3066   | -0.76 | -0.5  | -0.31 | -0.75 | -0.5  | -0.37 | 0.23  | -0.32 | 0.28  | 0.07  | 0.85  | 0.65  | 0.7   | 1.67  | 0.12 | 0.72  | 0.25  | -0.17 |
| IMAGp998I19695  | HEBP1  | heme binding protein 1 (HEBP1), mRNA                                         | NM_015987 | 50865  | -0.46 | -0.51 | -0.54 | -0.57 | -0.86 | -0.65 | 0.22  | 0.13  | 0.08  | 0.01  | -0.25 | -0.01 | 0.49  | 0.38  | 0.3  | 0.9   | 0.06  | 0.46  |
| IMAGp998K121789 | HECTD1 | HECT domain containing 1 (HECTD1), mRNA                                      | NM_015382 | 25831  | -0.54 | -0.45 | -0.26 | -0.54 | -0.21 | -0.34 | 0.12  | -0.15 | -0.07 | 0.37  | 0.05  | 0.79  | -0.08 | -0.14 | 0.98 | 0.68  | 0.5   | 1.04  |
| IMAGp998P01399  | HELIC1 | helicase, ATP binding 1 (HELIC1), mRNA                                       | NM_006828 | 10973  | -1.15 | -0.57 | -0.68 | -0.68 | -0.66 | -0.46 | -0.42 | -0.16 | -0.21 | 0.01  | 0.01  | 0.21  | -0.23 | -0.08 | 0.51 | 0.52  | 2     | -0.1  |
| IMAGp998H02566  | HERC4  | DKFZP564G092 protein (DKFZP564G092), mRNA                                    | NM_015601 | 26091  | -0.55 | -0.63 | -0.71 | -0.36 | -0.64 | -0.69 | 0     | 0.24  | -0.16 | 0.07  | 0.17  | -0.38 | 1.42  | 1.83  | 1.3  | 0.11  | -0.16 | 0.07  |
| IMAGp998F06310  | HEY1   | hairy/enhancer-of-split related with YRPW motif 1 (HEY1), mRNA               | NM_012258 | 23462  | -0.26 | -0.44 | -0.42 | -0.76 | -1.03 | -0.79 | 0.16  | -0.32 | 0.05  | -0.26 | -1.24 | -0.45 | 0.19  | 0.2   | 0.1  | -0.29 | 0.4   | 0.41  |
| IMAGp998M21210  | HIBCH  | 3-hydroxyisobutyryl-Coenzyme A hydrolase (HIBCH), transcript variant 1, mRNA | NM_014362 | 26275  | -0.83 | 0.26  | -0.59 | -0.24 | -0.35 | -1.07 | -0.33 | 0.41  | -0.04 | 0.07  | 0.92  | 0.42  | -0.02 | 0.6   | 0.4  | 0.52  | 0.2   | 1.17  |

IMAGp998P14736 HIF1A hypoxia-inducible factor 1, alpha subunit (basic helix-loop-helix transcription factor) NM\_001530 3091 -0.74 -0.76 -0.6 -0.75 -0.56 -1.08 0.38 -0.04 -0.4 -0.1 0.53 0.24 0.27 -0.14 2.31 1.75 1.5 2.33

IMAGp998I13570 HMGA2 high mobility group AT-hook 2 (HMGA2), mRNA NM\_003483 8091 -1.24 -0.67 -1.52 -0.66 -0.94 -1.39 -0.01 -0.37 0.2 0.06 -0.72 -0.12 0.28 -0.17 0.35 0.12 1 -0.4

IMAGp998A211963 HMMR hyaluronan-mediated motility receptor (RHAMM) (HMMR), transcript variant 2, mRNA NM\_012485 3161 -0.02 0.3 -0.65 -0.92 -0.63 -1.87 0.5 0.14 -0.04 -0.57 0.27 0.47 0.47 -0.43 2.16 1.55 1.6 2.19

IMAGp998P151789 HNRPD heterogeneous nuclear ribonucleoprotein D (AU-rich element RNA binding protein 1, 37kDa) NM\_002138 -0.28 -0.53 -0.81 -0.88 -0.6 -0.27 0.23 0.1 -0.52 -0.66 -1.02 0.04 0.02 -0.06 1.21 0.97 0.9 0.52

IMAGp998O16227 HNRPD Heterogeneous nuclear ribonucleoprotein D (AU-rich element RNA binding protein 1, 37kDa) 3184 -0.31 -0.39 -0.52 -0.72 -0.57 -0.76 0.22 -0.01 -0.29 -0.34 0.24 -0.02 0.06 0.09 0.81 0.68 1.2 0.67

IMAGp998B20728 HNRPD Heterogeneous nuclear ribonucleoprotein D (AU-rich element RNA binding protein 1, 37kDa) 3184 -0.82 -0.26 -0.47 -0.56 -0.33 -1.23 0.13 -0.14 0.18 0.02 -0.25 0.43 0.1 0.15 0.52 0.26 -0.3 -0.08

IMAGp998F21388 HNRPR heterogeneous nuclear ribonucleoprotein R (HNRPR), mRNA NM\_005826 10236 -0.67 -0.52 -0.34 0.41 -0.72 -1.93 0.5 0.56 -0.34 -0.27 0.15 0.08 0.31 -0.01 1.5 0.96 0.4 1.38

IMAGp998M141998 HNRPU1 E1B-55kDa-associated protein 5 (E1B-AP5), transcript variant 1, mRNA NM\_007040 11100 -0.22 -1.09 -0.83 -0.99 -0.58 -0.33 0.02 -0.14 -0.22 -0.39 -0.69 0.03 -0.12 0 0.81 0.83 -0.2 -0.15

IMAGp998D242009 HRB HIV-1 Rev binding protein -0.51 -0.8 -0.4 -0.55 -0.8 -0.9 0.03 -0.82 0.11 -0.6 0.51 0.85 -0.09 0.51 1.04 0.45 0.8 0.98

IMAGp998D15677 HRSP12 translational inhibitor protein p14.5 (UK114), mRNA NM\_005836 10247 -0.8 -0.39 -0.73 -0.67 -0.07 -0.88 0.11 0.12 0.18 0.28 0.68 0.68 0.28 -0.23 0.68 0.55 0.1 0.41

IMAGp998D05437 HS3ST1 heparan sulfate (glucosamine) 3-O-sulfotransferase 1 (HS3ST1), mRNA NM\_005114 9957 -0.24 -0.36 -0.78 -0.44 -0.75 -1.08 -0.18 0.18 0.57 0.3 -0.31 -0.16 0.54 0.14 0.03 0.19 0.3 0.32

IMAGp998H102009 HSPA14 likely ortholog of mouse heat shock protein, 70 kDa 4 (HSP70-4), mRNA NM\_016299 -0.54 -0.7 -0.67 -0.76 -0.52 -0.92 0.04 -0.17 -0.08 -0.44 -0.34 -0.11 0.24 -0.17 0.73 0.52 0.3 0.08

IMAGp998I22404 HSPA8 heat shock 70kDa protein 8 (HSPA8), transcript variant 1, mRNA NM\_006597 3312 -0.97 -0.8 -0.83 -0.55 -0.78 -1.26 -0.82 -0.61 -1.44 -1.34 0 -0.74 0.53 -0.89 0.97 1.26 0.3 1.3

IMAGp998G2370 IARS isoleucine-tRNA synthetase (IARS), transcript variant short, mRNA NM\_002161 3376 -1.57 -0.05 -2 0.2 -0.57 -2.22 -0.02 -0.1 -0.35 -1.7 0.18 0.3 0.4 -0.33 1.11 0.99 1.1 0.89

IMAGp998J061962 IDI1 isopentenyl-diphosphate delta isomerase (IDI1), mRNA NM\_004508 3422 -0.45 -0.1 -0.63 -0.44 -0.6 -0.35 0.18 0.32 0.04 0.23 0.78 0.33 0.21 -0.3 0.1 0.26 -0.1 -0.23

IMAGp998O05114 IFRD1 interferon-related developmental regulator 1 (IFRD1), mRNA NM\_001550 3475 -1.1 -0.24 -1 -1.04 -0.72 -0.8 -0.16 -0.47 -0.43 -0.44 -0.33 -0.67 0.04 -0.34 1.18 0.96 1.8 -0.04

IMAGp998M075808 IGHG1 Immunoglobulin heavy constant gamma 1 (G1m marker) -2.4 -0.73 -2.4 -0.11 -0.27 -1.46 0.36 0.78 -1.41 -0.59 -1.44 -0.64 0.73 -0.93 1.77 2.22 2 0.86

|                 |          |                                                                                         |           |       |       |                                                   |
|-----------------|----------|-----------------------------------------------------------------------------------------|-----------|-------|-------|---------------------------------------------------|
| IMAGp998K031012 | IKIP     | IKK interacting protein                                                                 | 121457    | -0.99 | -0.13 | -                                                 |
| 0.9             | -0.36    | -0.42                                                                                   | -0.99     | 0.03  | 0.29  | -0.48 0.14 0.58 0.59 -0.14 -0.17 0.37             |
|                 | 0.68     | 0.5                                                                                     | 1.22      |       |       |                                                   |
| IMAGp998M08735  | IL1B     | interleukin 1, beta (IL1B), mRNA                                                        | NM_000576 | 3553  | -     |                                                   |
| 0.51            | -0.49    | -0.67                                                                                   | -0.23     | -0.17 | -1.67 | -0.21 0.12 0.12 -0.24 -0.26 0.04 -0.05            |
|                 | 0.27     | 0.53                                                                                    | -0.02     | 0     | 0.6   |                                                   |
| IMAGp998A11656  | ILF2     | interleukin enhancer binding factor 2, 45kDa (ILF2), mRNA                               | NM_004515 | 3608  | -0.65 | -0.77 -0.96 -0.93 -0.64 -0.42 0.3 -0.12 -0.08 -   |
| 0.47            | -0.28    | -0.06                                                                                   | 0.33      | -0.23 | 0.98  | 1.44 0.5 1.2                                      |
| IMAGp998N13233  | IMPA1    | inositol(myo)-1(or 4)-monophosphatase 1 (IMPA1), mRNA                                   | NM_005536 | 3612  | -0.46 | 0.09 -0.12 -0.66 -0.74 -0.49 0.24 -0.11 -0.35 -   |
| 0.24            | 0.32     | 0.21                                                                                    | 0.14      | -0.01 | 0.83  | 0.15 0.2 1.21                                     |
| IMAGp998H03838  | INSIG1   | insulin induced gene 1 (INSIG1), transcript variant 3, mRNA                             | NM_198337 | 3638  | -0.49 | 0.01 -0.75 -0.51 -0.5 -0.52 0.56                  |
|                 | 0.47     | 0.1                                                                                     | 0.14      | 0.7   | 0.72  | -0.65 0.37 0.57 0.32 0.2 0.21                     |
| IMAGp998K232006 | IPO11    | importin 11 (IPO11), mRNA                                                               | NM_016338 |       | -0.45 | -                                                 |
| 0.4             | -0.43    | -0.36                                                                                   | 0.08      | -0.86 | 0.07  | 0.16 -0.14 0 0.35 0.03 0.48 -0.36                 |
|                 | 1.21     | 1.19                                                                                    | 0.6       | 0.7   |       |                                                   |
| IMAGp998K01789  | IPO7     | "IMPORTIN 7; RAN-BINDING PROTEIN 7. [Source:RefSeq;Acc:NM_006391]"                      | 10527     | -0.55 | -0.31 | -0.22 -0.3 -0.16 -                                |
| 0.33            | 0.06     | -0.25                                                                                   | -0.04     | -0.14 | -0.18 | 0.14 0.06 -0.08 0.88 0.47 0.8 0.43                |
| IMAGp998K21390  | IQWD1    | IQ motif and WD repeats 1                                                               |           |       |       | -0.15 0.1 -                                       |
| 0.09            | 0.07     | -0.37                                                                                   | -0.76     | 0.09  | -0.03 | 0.01 0 0.14 -0.22 0.16 0.14 0.23                  |
|                 | 0.28     | 0.7                                                                                     | 0.56      |       |       |                                                   |
| IMAGp998P212457 | ITGB3BP  | integrin beta 3 binding protein (beta3-endonexin) (ITGB3BP), mRNA                       | NM_014288 | 23421 | -0.53 | -0.32 -0.8 -0.76 -0.29 -1.39 0.19                 |
|                 | 0.11     | 0.26                                                                                    | -0.06     | 0.84  | 0.79  | 0.36 -0.11 0.84 0.53 0.5 0.37                     |
| IMAGp998H17200  | ITPR2    | Family with sequence similarity 20, member C                                            |           |       |       |                                                   |
|                 | -0.32    | -0.27                                                                                   | -0.62     | -0.55 | -0.89 | -0.93 -0.03 0.17 -0.38 -0.2 -0.07 0.2 -           |
| 0.38            | -0.08    | 0.07                                                                                    | 0.4       | 0.2   | 0.42  |                                                   |
| IMAGp998P05518  | KARS     | lysyl-tRNA synthetase (KARS), mRNA                                                      | NM_005548 | 3735  | -     |                                                   |
| 1.03            | -0.37    | -1.11                                                                                   | -0.58     | -0.6  | 0.04  | -0.18 0.17 -0.54 -0.2 -0.25 -0.3 -0.09 -          |
|                 | 0.17     | 1.12                                                                                    | 1.24      | 0.5   | 0.7   |                                                   |
| IMAGp998G181888 | KCNMB4   | potassium large conductance calcium-activated channel, subfamily M, beta member 4 (KCNM | NM_014505 | 27345 | -1.07 | -0.14 -0.96 -                                     |
| 0.5             | -0.92    | -1.39                                                                                   | -0.23     | -0.67 | -0.28 | -0.74 -0.48 0.19 0.03 -0.36 0.72 0.51 -           |
|                 | 0.2      | 0.57                                                                                    |           |       |       |                                                   |
| IMAGp998F08435  | KCTD15   | Potassium channel tetramerisation domain containing 15                                  | 79047     | -0.25 | -0.57 | -0.16 -0.71 -0.31 -0.7 -0.24 -0.62 -              |
| 0.48            | -0.93    | -0.11                                                                                   | -0.23     | 0     | 0.23  | 0.74 0.32 -0.1 0.65                               |
| IMAGp998G15525  | KDELC1   | KDEL (Lys-Asp-Glu-Leu) containing 1 (KDELC1), mRNA                                      | NM_024089 | 79070 | -0.52 | -2.22 -0.75 -0.44 -0.18 -0.78 -0.02 -0.08 -0.07 - |
| 0.25            | -0.65    | 0.28                                                                                    | 0.24      | -0.26 | 0.77  | 0.67 0 0.52                                       |
| IMAGp998O21375  | KIAA0372 | KIAA0372 (KIAA0372), mRNA                                                               | NM_014639 | 9652  | -     |                                                   |
| 0.93            | -0.46    | -0.99                                                                                   | -0.64     | -0.08 | -0.6  | 0.1 0.06 0.27 -0.29 -1.1 0.14 0.38 -              |
|                 | 0.18     | 1.32                                                                                    | 1.49      | -0.2  | 0.5   |                                                   |
| IMAGp998E16540  | KIAA0586 | KIAA0586 (KIAA0586), mRNA                                                               | NM_014749 | 9786  | -     |                                                   |
| 0.58            | -0.26    | -1.26                                                                                   | -0.58     | -1.17 | -0.88 | -0.03 0.46 -0.53 -0.16 -0.26 -0.11 -0.14 -        |
|                 | 0.51     | 0.41                                                                                    | 1         | 0.9   | 0.27  |                                                   |
| IMAGp998G11613  | KIAA0853 | KIAA0853                                                                                | 23091     | -0.08 | -0.72 | -0.14 -0.4 -                                      |
| 0.1             | 0.11     | -0.04                                                                                   | -0.08     | -0.08 | -0.17 | -0.02 0.11 0.15 0.03 0.95 0.94 0.6                |
|                 | 1.73     |                                                                                         |           |       |       |                                                   |
| IMAGp998M11121  | KIAA0992 | palladin                                                                                | NM_016081 | 23022 | -0.4  | -0.23 -0.44 -                                     |
| 0.33            | -0.16    | -2.53                                                                                   | 1.6       | -0.52 | 0.41  | -0.3 1.53 -0.57 0.32 -0.01 2.05 1.69              |
|                 | 1.8      | 2.41                                                                                    |           |       |       |                                                   |









|                 |                                                                                               |           |        |       |       |       |       |       |       |       |
|-----------------|-----------------------------------------------------------------------------------------------|-----------|--------|-------|-------|-------|-------|-------|-------|-------|
| IMAGp998N012010 | MYBL1 v-myb myeloblastosis viral oncogene homolog (avian)-like 1 (MYBL1), mRNA                | XM_034274 | -0.23  | -0.86 | 0.01  | -1.29 | -0.59 | -0.28 | 0.53  | -     |
|                 |                                                                                               |           | 0.02   | 0.61  | -1.1  | -0.71 | 0.19  | 0.23  | 0.71  | 1.2   |
|                 |                                                                                               |           |        |       |       |       |       |       | -0.06 | 0.8   |
|                 |                                                                                               |           |        |       |       |       |       |       | 0.93  |       |
| IMAGp998D171775 | MYC v-myc myelocytomatosis viral oncogene homolog (avian) (MYC), mRNA                         | NM_002467 | 4609   | -1    | 0.24  | -0.53 | -0.1  | -0.37 | -0.45 | -0.02 |
|                 |                                                                                               |           |        |       |       |       |       |       | -0.12 | -     |
|                 |                                                                                               |           | 0.21   | 0.08  | -0.01 | -0.01 | -0.06 | -0.04 | 0.59  | 0.51  |
|                 |                                                                                               |           |        |       |       |       |       |       | 0.8   | 1.03  |
| IMAGp998C09561  | MYCBP c-myc binding protein (MYCBP), mRNA                                                     | NM_012333 |        |       |       |       |       |       |       |       |
|                 |                                                                                               |           | 0.27   | -0.08 | -0.42 | -0.1  | -0.19 | -0.81 | -0.01 | 0.12  |
|                 |                                                                                               |           |        |       |       |       |       |       | -0.17 | 0.28  |
|                 |                                                                                               |           | 0.34   | 0.57  | 0.49  | 0.5   | 1.12  |       | 0.59  | 0.25  |
|                 |                                                                                               |           |        |       |       |       |       |       | 0.26  | -     |
| IMAGp998H01379  | MYO1B myosin IB (MYO1B), mRNA                                                                 | XM_290989 | 4430   |       |       |       |       |       |       |       |
|                 |                                                                                               |           | 1.34   | -0.54 | -0.85 | -0.53 | -0.28 | -0.32 | -0.37 | -0.26 |
|                 |                                                                                               |           |        |       |       |       |       |       | -0.19 | -0.13 |
|                 |                                                                                               |           |        |       |       |       |       |       | -0.21 | -0.23 |
|                 |                                                                                               |           |        | 0.66  | 0.9   | 0.1   |       |       | 0.59  |       |
| IMAGp998E031722 | NAP1L napsin B pseudogene (NAP1L), misc RNA                                                   | XR_000169 |        |       |       |       |       |       |       |       |
|                 |                                                                                               |           | 256236 |       |       |       |       |       |       |       |
|                 |                                                                                               |           |        | -0.09 | -0.32 | -0.41 | -0.27 | -1.09 | 0.16  | 0.12  |
|                 |                                                                                               |           |        |       |       |       |       |       | -0.21 | -0.22 |
|                 |                                                                                               |           | 0.01   | 0.16  | 0.24  | 0.26  | 0.08  | 0.16  | 0.9   | 1.07  |
| IMAGp998G202010 | NCF4 neutrophil cytosolic factor 4, 40kDa (NCF4), transcript variant 1, mRNA                  | NM_000631 |        |       |       |       |       |       |       |       |
|                 |                                                                                               |           | 0.36   | 0.08  | -0.67 | -0.61 | -0.18 | 0.47  | -0.48 | 2.16  |
|                 |                                                                                               |           |        |       |       |       |       |       | 2.28  | 1.7   |
|                 |                                                                                               |           |        |       |       |       |       |       | 2.44  |       |
| IMAGp998F09192  | NCKAP1 NCK-associated protein 1 (NCKAP1), mRNA                                                | NM_013436 | 10787  | -0.2  | -0.71 | -0.16 | -0.7  | -0.21 | -0.31 | 0.13  |
|                 |                                                                                               |           |        |       |       |       |       |       | -0.06 | -0.32 |
|                 |                                                                                               |           | 0.13   | 0.21  | 0.61  | -0.21 | 0.34  | 1.2   | 0.77  | 0.5   |
|                 |                                                                                               |           |        |       |       |       |       |       | 1.38  |       |
| IMAGp998C09872  | NDEL1 nude nuclear distribution gene E homolog like 1 (A. nidulans) (NDEL1), mRNA             | NM_030808 | 81565  | -0.53 | -0.19 | -0.69 | -0.18 | -0.31 | -0.31 | -     |
|                 |                                                                                               |           |        |       |       |       |       |       | -0.31 | -     |
|                 |                                                                                               |           | 0.18   | -0.14 | -0.24 | -0.29 | -0.63 | -0.48 | -0.16 | 0.02  |
|                 |                                                                                               |           |        |       |       |       |       |       | 0.45  | 0.29  |
|                 |                                                                                               |           |        |       |       |       |       |       | 1.1   | 0.53  |
| IMAGp998F07443  | NDUFA10 NADH dehydrogenase (ubiquinone) 1 alpha subcomplex, 10, 42kDa                         |           | 4705   | -1.25 | -0.38 | -0.8  | -0.2  | -0.6  | -0.72 | -0.09 |
|                 |                                                                                               |           |        |       |       |       |       |       | -0.72 | -0.09 |
|                 |                                                                                               |           | 0.22   | 0.17  | 0.09  | 0.54  | 0.36  | -0.23 | -0.15 | 0.43  |
|                 |                                                                                               |           |        |       |       |       |       |       | 0.39  | 0.8   |
|                 |                                                                                               |           |        |       |       |       |       |       | 0.39  |       |
| IMAGp998C16517  | NEDD4 neural precursor cell expressed, developmentally down-regulated 4 (NEDD4), mRNA         | NM_198400 |        |       |       |       |       |       |       |       |
|                 |                                                                                               |           | 0.58   | -0.04 | -0.01 | -0.37 | 0.13  | -0.39 | -0.48 | -0.09 |
|                 |                                                                                               |           |        |       |       |       |       |       | -0.23 | 2.45  |
|                 |                                                                                               |           |        |       |       |       |       |       | 0.54  | 1.5   |
|                 |                                                                                               |           |        |       |       |       |       |       | 0.71  |       |
| IMAGp998K23921  | NEDD5 neural precursor cell expressed, developmentally down-regulated 5 (NEDD5), mRNA         | NM_004404 | 4735   | -0.03 | -0.63 | -0.02 | -0.66 | -0.28 | -     |       |
|                 |                                                                                               |           |        |       |       |       |       |       | -0.28 | -     |
|                 |                                                                                               |           | 0.62   | 0.35  | -0.03 | -0.24 | -0.38 | 0.5   | 0.3   | 0.13  |
|                 |                                                                                               |           |        |       |       |       |       |       | -0.06 | 0.9   |
|                 |                                                                                               |           |        |       |       |       |       |       | 0.67  | 0     |
|                 |                                                                                               |           |        |       |       |       |       |       | 0.44  |       |
| IMAGp998H10785  | NEDD5 neural precursor cell expressed, developmentally down-regulated 5 (NEDD5), mRNA         | NM_004404 | 4735   | -0.03 | -0.62 | -0.05 | -0.57 | -0.4  | -     |       |
|                 |                                                                                               |           |        |       |       |       |       |       | -0.4  | -     |
|                 |                                                                                               |           | 0.63   | 0.13  | 0.26  | -0.42 | -0.18 | 0.01  | 0.08  | 0.01  |
|                 |                                                                                               |           |        |       |       |       |       |       | -0.15 | 0.82  |
|                 |                                                                                               |           |        |       |       |       |       |       | 0.87  | 0     |
|                 |                                                                                               |           |        |       |       |       |       |       | 0.31  |       |
| IMAGp998H161888 | NF2 neurofibromin 2 (bilateral acoustic neuroma) (NF2), transcript variant 2, mRNA            | NM_016418 | 4771   | -0.73 | -0.17 | -0.92 | -0.16 | -0.44 | -     |       |
|                 |                                                                                               |           |        |       |       |       |       |       | -0.44 | -     |
|                 |                                                                                               |           | 0.83   | -0.15 | 0.13  | -0.36 | -0.06 | 0.61  | -0.02 | 0.13  |
|                 |                                                                                               |           |        |       |       |       |       |       | -0.44 | 0.47  |
|                 |                                                                                               |           |        |       |       |       |       |       | 0.76  | 0.3   |
|                 |                                                                                               |           |        |       |       |       |       |       | 0.55  |       |
| IMAGp998A20687  | NFYB nuclear transcription factor Y, beta (NFYB), mRNA                                        | NM_006166 | 4801   | -0.54 | -0.24 | -0.37 | -0.29 | -0.64 | -0.19 | 0.51  |
|                 |                                                                                               |           |        |       |       |       |       |       | 0.2   | 0.02  |
|                 |                                                                                               |           | 0.4    | 0.1   | 0.05  | 0.09  | -0.42 | 0.94  | 0.95  | 0.5   |
|                 |                                                                                               |           |        |       |       |       |       |       | 0.72  |       |
| IMAGp998I13529  | NGRN mesenchymal stem cell protein DSC92 (NEUGRIN), mRNA                                      | NM_016645 | 51335  | -0.39 | -0.24 | -0.54 | -0.7  | -0.61 | -0.09 | 0.23  |
|                 |                                                                                               |           |        |       |       |       |       |       | 0.01  | 0.08  |
|                 |                                                                                               |           | 0.22   | -0.3  | 0.2   | 0.22  | -0.23 | 0.75  | 0.52  | 0.2   |
|                 |                                                                                               |           |        |       |       |       |       |       | -0.08 |       |
| IMAGp998D121005 | NIPA2 non-imprinted in Prader-Willi/Angelman syndrome 2 (NIPA2), mRNA                         | NM_030922 | 23191  | -1.13 | 0.4   | -1.28 | -0.12 | -0.37 | -1.84 | -0.2  |
|                 |                                                                                               |           |        |       |       |       |       |       | -0.2  | -     |
|                 |                                                                                               |           | 0.17   | -0.69 | -0.51 | -0.61 | 0.17  | 0.14  | -0.18 | 0.67  |
|                 |                                                                                               |           |        |       |       |       |       |       | 0.78  | 1.2   |
|                 |                                                                                               |           |        |       |       |       |       |       | 0.61  |       |
| IMAGp998A131725 | NMI N-myc (and STAT) interactor (NMI), mRNA                                                   | NM_004688 |        |       |       |       |       |       |       |       |
|                 |                                                                                               |           | 9111   | -0.72 | -0.6  | -0.75 | -0.51 | 0.02  | -0.19 | 0.16  |
|                 |                                                                                               |           |        |       |       |       |       |       | 0.38  | 0.19  |
|                 |                                                                                               |           |        |       |       |       |       |       | 0.13  | 0.74  |
|                 |                                                                                               |           | 0.44   | 0.31  | -0.51 | 0.52  | 0.66  | 0.7   | 0.91  |       |
| IMAGp998H025601 | NOLA1 nucleolar protein family A, member 1 (H/ACA small nucleolar RNPs) (NOLA1), transcript v | NM_032993 | 54433  | -0.87 | -1.41 | -1.01 |       |       |       |       |
|                 |                                                                                               |           |        |       |       |       |       |       |       |       |
|                 |                                                                                               |           | 0.05   | -1.35 | -0.97 | 0.36  | -0.2  | -0.25 | -0.48 | -1.15 |
|                 |                                                                                               |           |        |       |       |       |       |       | -0.27 | 0.23  |
|                 |                                                                                               |           |        |       |       |       |       |       | 0.06  | 0.83  |
|                 |                                                                                               |           | 0.83   | -0.4  | 0.46  |       |       |       |       |       |

|                 |        |                                                                                         |           |       |       |       |       |       |       |       |       |       |       |       |       |   |
|-----------------|--------|-----------------------------------------------------------------------------------------|-----------|-------|-------|-------|-------|-------|-------|-------|-------|-------|-------|-------|-------|---|
| IMAGp998O21642  | NRCAM  | neuronal cell adhesion molecule (NRCAM), mRNA                                           | NM_005010 | -0.85 | -0.4  | -1.05 | -0.74 | -0.98 | -1.64 | -0.44 | -0.2  | -0.63 | -     |       |       |   |
| 0.29            | 0.55   | 0.39                                                                                    | -0.09     | 0.03  | 0.18  | 0.36  | 0.7   | 1.11  |       |       |       |       |       |       |       |   |
| IMAGp998L211205 | NRP1   | neuropilin 1 (NRP1), mRNA                                                               | NM_003873 |       |       |       |       |       |       |       |       | -0.89 | -     |       |       |   |
| 0.45            | -0.66  | -0.85                                                                                   | -0.13     | -0.78 | 0.56  | 0.37  | -0.35 | -0.77 | -0.34 | -0.2  | -0.19 | 0.28  |       |       |       |   |
|                 | 1.38   | 0.99                                                                                    | 1.9       | 1.11  |       |       |       |       |       |       |       |       |       |       |       |   |
| IMAGp998J02870  | NS3TP1 | HCV NS3-transactivated protein 1 (NS3TP1), mRNA                                         | NM_019048 | 54529 | -1.42 | -0.54 | -1.12 | -0.65 | -0.37 | -0.75 | -0.38 | -0.38 | -0.35 | -     |       |   |
| 0.12            | -0.2   | -0.49                                                                                   | -0.12     | -0.39 | 0.52  | 0.55  | 1.4   | -0.29 |       |       |       |       |       |       |       |   |
| IMAGp998G07613  | NSF    | N-ethylmaleimide-sensitive factor (NSF), mRNA                                           | NM_006178 |       | -1.03 | -0.72 | -0.36 | -0.93 | -0.21 | -0.78 | 0.18  | -0.09 | -0.23 | -     |       |   |
| 0.49            | -0.3   | -0.22                                                                                   | 0.15      | -0.04 | 1.17  | 0.01  | 1     | -0.16 |       |       |       |       |       |       |       |   |
| IMAGp998E11660  | NSMAF  | neutral sphingomyelinase (N-SMase) activation associated factor (NSMAF), mRNA           | NM_003580 |       | -0.25 | -0.46 | -0.38 | -0.49 | -0.14 | -0.45 |       |       |       |       |       |   |
|                 | 0.17   | -0.29                                                                                   | -0.12     | -0.38 | -0.54 | 0.27  | 0.01  | -0.06 | 0.38  | 0.72  | 0     | 0.48  |       |       |       |   |
| IMAGp998I151945 | NTHL1  | nth endonuclease III-like 1 (E. coli) (NTHL1), mRNA                                     | NM_002528 |       | -0.35 | -0.84 | -0.03 | -0.73 | -0.22 | -1.23 | 0.16  | -0.3  | 0.08  | -     |       |   |
| 0.55            | 0.79   | -0.05                                                                                   | 0.13      | 0.16  | 1.19  | 0.51  | 0.8   | 0.69  |       |       |       |       |       |       |       |   |
| IMAGp998N191936 | NUDT9  | nudix (nucleoside diphosphate linked moiety X)-type motif 9 (NUDT9), transcript variant | NM_198039 | 53343 | -0.87 | -0.21 | -0.92 | -0.33 | -     |       |       |       |       |       |       |   |
| 0.43            | -0.84  | -0.34                                                                                   | 0.09      | -0.16 | -0.19 | 0.22  | 0.22  | -0.06 | -0.06 | 0.37  | 0.61  | 0.5   |       |       |       |   |
|                 | 0.37   |                                                                                         |           |       |       |       |       |       |       |       |       |       |       |       |       |   |
| IMAGp998F021787 | NUDT9  | nudix (nucleoside diphosphate linked moiety X)-type motif 9 (NUDT9), transcript variant | NM_198039 | 53343 | -0.73 | -0.12 | -0.7  | -0.32 | -     |       |       |       |       |       |       |   |
| 0.39            | -0.76  | -0.2                                                                                    | 0.13      | -0.07 | 0.25  | 0.32  | 0.29  | -0.18 | 0.04  | 0.18  | 0.27  | 0     |       |       |       |   |
|                 | 0.29   |                                                                                         |           |       |       |       |       |       |       |       |       |       |       |       |       |   |
| IMAGp998D17244  | NUP107 | nuclear pore complex protein (NUP107), mRNA                                             | NM_020401 | 57122 | -0.04 | -1.08 | -0.86 | -0.9  | -0.73 | -0.89 | 0.09  | 0.02  | 0.14  |       |       |   |
|                 | 0.15   | 0.2                                                                                     | -0.08     | 0.19  | -0.03 | 1.2   | 0.83  | 1.2   | 0.97  |       |       |       |       |       |       |   |
| IMAGp998E01631  | NUP153 | Nucleoporin 153kDa (NUP153), mRNA                                                       | NM_005124 | 9972  | -0.54 | -0.99 | -0.27 | -1.02 | -0.58 | -0.43 | -0.14 | -0.51 | -0.18 | -0.67 | -0.59 |   |
|                 | 0.15   | -0.23                                                                                   | 0.39      | 0.5   | -0.09 | 0.7   | 0.79  |       |       |       |       |       |       |       |       |   |
| IMAGp998N04179  | NUP155 | Nucleoporin 155kDa (NUP155), transcript variant 1, mRNA                                 | NM_153485 |       | -0.35 | -0.72 | -1.11 | -0.81 | -0.93 | -0.84 | -0.22 | -0.17 | -0.17 | -     |       |   |
| 0.04            | 0.23   | -0.04                                                                                   | 0.18      | -0.43 | 0.24  | 0.38  | 0.5   | 0.88  |       |       |       |       |       |       |       |   |
| IMAGp998M221166 | NUP205 | Nucleoporin 205kDa                                                                      | NM_015135 | 23165 | -0.35 | -     |       |       |       |       |       |       |       |       |       |   |
| 0.78            | -0.17  | -1.01                                                                                   | -0.01     | -2.08 | 0.73  | -0.44 | 0.61  | -0.63 | 0.74  | 0.01  | 0.35  | 0.78  |       |       |       |   |
|                 | 1.16   | 0.06                                                                                    | 0.5       | 0.62  |       |       |       |       |       |       |       |       |       |       |       |   |
| IMAGp998F15369  | NUP37  | Nucleoporin Nup37 (Nup37), mRNA                                                         | NM_024057 | 79023 | -     |       |       |       |       |       |       |       |       |       |       |   |
| 0.68            | -0.19  | -0.48                                                                                   | -0.57     | -0.27 | -0.67 | 0.14  | -0.08 | 0.03  | -0.27 | -0.37 | 0.32  | 0.41  | -     |       |       |   |
| 0.28            | 1.31   | 1.09                                                                                    | 0.9       | 1.33  |       |       |       |       |       |       |       |       |       |       |       |   |
| IMAGp998F021780 | NUP54  | Nucleoporin 54kDa (NUP54), mRNA                                                         | NM_017426 | 53371 | -     |       |       |       |       |       |       |       |       |       |       |   |
| 0.57            | -0.28  | -0.64                                                                                   | -0.52     | -0.73 | 0.06  | 0.07  | -0.21 | -0.21 | -0.31 | -0.09 | 0.27  | 0.04  |       |       |       |   |
|                 | 0.25   | 0.66                                                                                    | 0.44      | 0.5   | 2.32  |       |       |       |       |       |       |       |       |       |       |   |
| IMAGp998D14670  | NUSAP1 | nucleolar and spindle associated protein 1 (NUSAP1), mRNA                               | NM_016359 | 51203 | -0.01 | -0.48 | -1.07 | -1.22 | -1.38 | -0.63 | 0.03  | -     |       |       |       |   |
| 0.27            | -0.43  | 0.07                                                                                    | -0.33     | 0.5   | 0.36  | -0.33 | 1.69  | 1.51  | 0.6   | 1.69  |       |       |       |       |       |   |
| IMAGp998M211869 | OAT    | Ornithine aminotransferase (gyrate atrophy) (OAT), nuclear gene encoding mitochondrial  | NM_000274 | 4942  | -0.64 | -0.6  | -0.26 | -1.09 | -     |       |       |       |       |       |       |   |
| 0.26            | -0.67  | 0.68                                                                                    | 0.29      | 0.39  | -0.2  | 0.1   | 0.57  | 0.32  | -0.08 | 0.98  | 0.35  | 1.5   |       |       |       |   |
|                 | 0.6    |                                                                                         |           |       |       |       |       |       |       |       |       |       |       |       |       |   |
| IMAGp998D12672  | ODC1   | Ornithine decarboxylase 1 (ODC1), mRNA                                                  | NM_002539 | 4953  | -0.42 | -0.43 | -0.72 | -0.94 | -0.35 | -1.1  | 0.29  | 0.01  | -0.76 | -1.04 | -0.03 | - |
| 0.18            | 0.59   | -0.48                                                                                   | 1.52      | 1.33  | 0.1   | 0.61  |       |       |       |       |       |       |       |       |       |   |
| IMAGp998H05131  | OGFRL1 | Opioid growth factor receptor-like 1 (OGFRL1), mRNA                                     | NM_024576 | 79627 | -0.94 | -0.71 | -1.12 | -0.62 | -0.24 | -0.15 | -0.26 | -0.02 | -0.38 | -     |       |   |
| 0.26            | -0.2   | -0.03                                                                                   | -0.08     | -0.39 | 0.46  | 0.53  | 0     | 0.41  |       |       |       |       |       |       |       |   |



|                 |        |                                                                                         |           |       |       |       |       |       |       |       |       |       |       |       |
|-----------------|--------|-----------------------------------------------------------------------------------------|-----------|-------|-------|-------|-------|-------|-------|-------|-------|-------|-------|-------|
| IMAGp998C213904 | PHTF1  | putative homeodomain transcription factor 1 (PHTF1), mRNA                               | NM_006608 |       | -0.39 | -0.01 | -0.19 | -0.34 | -0.09 | -0.48 | 0.41  | -0.06 | 0.23  | -     |
|                 |        |                                                                                         |           | 0.06  | 0.66  | 0.25  | 0.4   | 0.09  | 0.69  | 0.57  | 0.8   | 1.08  |       |       |
| IMAGp998P19602  | PIK3CA | phosphoinositide-3-kinase, catalytic, alpha polypeptide (PIK3CA), mRNA                  | NM_006218 | 5290  | -0.49 | -0.19 | -0.28 | -0.15 | -0.2  | -     |       |       |       |       |
|                 |        |                                                                                         |           | 0.42  | 0.25  | 0.34  | 0.06  | -0.01 | -0.17 | 0.63  | -0.28 | 0.03  | 0.66  | 0.5   |
| IMAGp998A192002 | PIP3AP | phosphatidylinositol-3-phosphate associated protein (PIP3AP), mRNA                      | NM_019061 | 54545 | -0.41 | -0.84 | -0.18 | -0.92 | 0.11  | -0.28 |       |       |       |       |
|                 |        |                                                                                         |           | 0.2   | -0.17 | -0.29 | 0.12  | -0.41 | -0.24 | 0.13  | 0.04  | 1.25  | 0.77  | 0.3   |
| IMAGp998E22473  | PIR    | Pirin (PIR), mRNA                                                                       | NM_003662 | 8544  | -0.87 | -0.16 | -1.15 | -     |       |       |       |       |       |       |
|                 |        |                                                                                         |           | 0.32  | -0.62 | -0.89 | -0.15 | 0.46  | 0.07  | 0.02  | 0.52  | 0.14  | 0.05  | -0.66 |
|                 |        |                                                                                         |           |       | 0.6   | 1.03  |       |       |       |       |       |       |       |       |
| IMAGp998F12383  | PLK2   | Polo-like kinase 2 (Drosophila) (PLK2), mRNA                                            | NM_006622 |       | -0.54 | -0.41 | -0.34 | -0.58 | -0.42 | -0.59 | -0.38 | -0.43 | -0.31 |       |
|                 |        |                                                                                         |           | 0.05  | 0.16  | 0.25  | -0.2  | 0.26  | 0.54  | 0.35  | -0.3  | 0.36  |       |       |
| IMAGp998B22257  | PLK4   | Polo-like kinase 4 (Drosophila) (PLK4), mRNA                                            | NM_014264 | 10733 | -1.12 | 0     | -0.8  | -0.91 | -0.39 | -1.2  | 0.12  | -0.2  | -0.13 | -     |
|                 |        |                                                                                         |           | 0.3   | 0.09  | 0.16  | 0.09  | -0.18 | 0.58  | 0.37  | 0.5   | 0.59  |       |       |
| IMAGp998F19569  | PLOD2  | Procollagen-lysine, 2-oxoglutarate 5-dioxygenase (lysine hydroxylase) 2 (PLOD2), transc | NM_000935 | 5352  | -0.49 | 0.23  | -0.77 | -0.24 | -     |       |       |       |       |       |
|                 |        |                                                                                         |           | 0.53  | -1.31 | -0.37 | -0.07 | -0.37 | 0.1   | 0.06  | 0.13  | -0.44 | -0.04 | 0.69  |
|                 |        |                                                                                         |           |       | 1.04  |       |       |       |       |       |       |       |       | 1     |
| IMAGp998K09590  | PMSCL1 | Polymyositis/scleroderma autoantigen 1, 75kDa (PMSCL1), mRNA                            | NM_005033 | 5393  | -1.52 | -0.49 | -1.42 | -0.99 | -0.06 | -0.73 | -0.5  |       |       |       |
|                 |        |                                                                                         |           | 0.04  | -0.5  | 0     | -0.2  | -0.29 | -0.43 | -0.21 | 0.47  | 0.71  | 0.2   | 0.14  |
| IMAGp998C02631  | PNPT1  | Polyribonucleotide nucleotidyltransferase 1 (PNPT1), mRNA                               | NM_033109 | 87178 | -0.81 | -0.21 | -0.98 | -0.35 | -0.41 | -0.37 | -0.35 | -0.07 | -0.31 |       |
|                 |        |                                                                                         |           | 0.1   | -0.55 | -0.24 | 0     | -0.55 | 1.09  | 1.52  | 0.5   | 1.06  |       |       |
| IMAGp998G071937 | POLE2  | Polymerase (DNA directed), epsilon 2 (p59 subunit) (POLE2), mRNA                        | NM_002692 |       | -0.54 | -0.43 | -0.69 | -0.44 | -0.43 | -1.68 | 0.21  | -     |       |       |
|                 |        |                                                                                         |           | 0.02  | 0.29  | 0.22  | 0.28  | 0     | -0.15 | -0.04 | 0.17  | 0.26  | 0.3   | 0.31  |
| IMAGp998P242008 | POLR1B | Polymerase (RNA) I polypeptide B, 128kDa (POLR1B), mRNA                                 | NM_019014 | 84172 | -0.61 | -0.5  | -0.38 | -0.38 | -0.16 | -1.72 | 0.34  | -0.36 | 0.23  | -     |
|                 |        |                                                                                         |           | 0.26  | 0.35  | -0.51 | 0.33  | -0.14 | 1.02  | 0.84  | 1.2   | 0.35  |       |       |
| IMAGp998G20400  | POLR2K | Polymerase (RNA) II (DNA directed) polypeptide K, 7.0kDa (POLR2K), mRNA                 | NM_005034 |       | -0.35 | -0.3  | -0.15 | -0.34 | -0.45 | -0.62 |       |       |       |       |
|                 |        |                                                                                         |           | 0.3   | 0.13  | -0.05 | 0.07  | 1.2   | 0.18  | 0.28  | -0.2  | 1.14  | 0.76  | 0.6   |
| IMAGp998N17150  | PP     | Pyrophosphatase (inorganic) (PP), mRNA                                                  | NM_021129 | 5464  | -1.68 | -0.31 | -1.85 | -0.19 | -0.29 | -0.83 | 0     | 0.1   | -0.56 | -1.68 |
|                 |        |                                                                                         |           | 0.04  | 0.17  | -0.34 | 1.02  | 1.12  | 1     | 0.79  |       |       |       | -0.37 |
| IMAGp998B12325  | PPARBP | PPAR binding protein                                                                    |           | 5469  | -0.67 | -0.22 | -1    |       |       |       |       |       |       |       |
|                 |        |                                                                                         |           | -0.22 | -0.49 | -0.64 | -0.15 | 0.05  | -0.12 | 0.04  | -0.66 | 0.18  | -0.29 | -0.29 |
|                 |        |                                                                                         |           |       | 0.29  | 1.2   | 0.6   |       |       |       |       |       |       |       |
| IMAGp998M07660  | PPAT   | phosphoribosyl pyrophosphate amidotransferase (PPAT), mRNA                              | NM_002703 | 5471  | -1.18 | -0.58 | -0.81 | -0.76 | -0.42 | -0.97 | -0.45 | -0.46 | -0.42 | -     |
|                 |        |                                                                                         |           | 0.01  | -0.72 | 0.54  | -0.12 | -0.02 | 0.04  | 0.33  | -0.3  | 1.68  |       |       |
| IMAGp998F23578  | PPP1CB | Protein phosphatase 1, catalytic subunit, beta isoform (PPP1CB), mRNA                   | NM_002709 |       | -0.28 | -0.41 | -0.15 | -0.35 | -0.25 | -0.73 |       |       |       |       |
|                 |        |                                                                                         |           | 0.24  | 0.16  | -0.2  | 0.01  | 0.17  | 0.35  | -0.35 | 0.18  | 0.73  | 0.51  | 0.6   |
| IMAGp998H01617  | PPP1CC | Protein phosphatase 1, catalytic subunit, gamma isoform (PPP1CC), mRNA                  | NM_002710 | 5501  | -0.58 | -0.51 | -0.05 | -0.81 | -0.42 | -0.92 |       |       |       |       |
|                 |        |                                                                                         |           | 0.19  | -0.42 | -0.17 | -0.57 | -0.28 | 0.4   | 0.18  | 0.03  | 1.49  | 0.93  | 0.9   |
| IMAGp998N171933 | PRC1   | Protein regulator of cytokinesis 1 (PRC1), transcript variant 3, mRNA                   | NM_199414 | 9055  | 0     | -0.34 | -1    | -1.17 | -0.94 | -0.83 | 0.27  | -     |       |       |
|                 |        |                                                                                         |           | 0.29  | -0.46 | -1.03 | -0.64 | -0.47 | 0.4   | -0.25 | 1.83  | 1.35  | 0.5   | 1.36  |

|                 |        |                                                                                         |           |       |       |       |       |       |       |       |       |       |       |       |       |       |       |       |       |      |      |      |       |
|-----------------|--------|-----------------------------------------------------------------------------------------|-----------|-------|-------|-------|-------|-------|-------|-------|-------|-------|-------|-------|-------|-------|-------|-------|-------|------|------|------|-------|
| IMAGp998G243521 | PRDX6  | peroxiredoxin 6 (PRDX6), mRNA                                                           | NM_004905 | 9588  | -0.59 | -     | 0.51  | -0.61 | -0.81 | -0.65 | 0     | 0.6   | 0.06  | 0.6   | 0.02  | 0.07  | 0.43  | 0.18  | 0.05  |      |      |      |       |
|                 |        |                                                                                         |           |       |       |       | 0.95  | 0.58  | -0.2  | 0.67  |       |       |       |       |       |       |       |       |       |      |      |      |       |
| IMAGp998E171156 | PRKACB | Protein kinase, cAMP-dependent, catalytic, beta (PRKACB), transcript variant 1, mRNA    | NM_182948 | 5567  | -1.11 | -0.54 | -0.74 | -     | 0.89  | -0.94 | -1.36 | -0.16 | -0.11 | -0.21 | 0.13  | 0.58  | 0.59  | -0.22 | -0.03 | 0.59 | 0.44 |      |       |
|                 |        |                                                                                         |           |       |       |       | 0.4   | 0.65  |       |       |       |       |       |       |       |       |       |       |       |      |      |      |       |
| IMAGp998A03646  | PRKCN  | Protein kinase C, nu (PRKCN), mRNA                                                      | NM_005813 | 23683 | -     | 0.79  | -0.29 | -0.27 | -0.35 | -0.44 | -0.18 | 0.11  | -0.18 | 0.49  | -0.18 | -0.09 | -0.22 | 0.05  |       |      |      |      |       |
|                 |        |                                                                                         |           |       |       |       | 0.33  | 0.92  | 0.36  | 1     | 2.03  |       |       |       |       |       |       |       |       |      |      |      |       |
| IMAGp998H101937 | PRKDC  | Protein kinase, DNA-activated, catalytic polypeptide (PRKDC), mRNA                      | NM_006904 | 5591  | -0.31 | -0.38 | -0.59 | -0.66 | -0.52 | -0.02 | 0.24  | 0     | -0.25 | -0.28 | 0.61  | 0.43  | 0.22  | -0.13 | 1.46  | 1.08 | 0.5  | 1.13 |       |
| IMAGp998B10117  | PRKRA  | Protein kinase, interferon-inducible double stranded RNA dependent activator (PRKRA), m | NM_003690 | 8575  | -0.65 | -0.33 | -0.38 | -0.34 | -     | 0.23  | -1    | 0.04  | -0.27 | -0.11 | -0.03 | 0.34  | 0.4   | 0.11  | -0.02 | 0.77 | 0.3  | 0    |       |
|                 |        |                                                                                         |           |       |       |       | 1.1   |       |       |       |       |       |       |       |       |       |       |       |       |      |      |      |       |
| IMAGp998B14677  | PRPF18 | PRP18 pre-mRNA processing factor 18 homolog (yeast) (PRPF18), mRNA                      | NM_003675 | 8559  | -1.12 | 0.01  | -0.97 | -0.3  | -0.7  | -0.43 | -     | 0.04  | 0     | -0.32 | 0.04  | -0.44 | 0.34  | 0.23  | -0.76 | 1.12 | 1.09 | 0.2  | 1.16  |
| IMAGp998M011964 | PSAT1  | Phosphoserine aminotransferase 1 (PSAT1), transcript variant 1, mRNA                    | NM_058179 | 29968 | -0.48 | -0.62 | -1.5  | -2.02 | -2.06 | -1.7  | 0.06  | -     | 0.62  | -0.05 | -0.56 | 0.09  | 0     | 0.03  | 0.2   | 0.72 | 0.11 | -0.1 | 0.26  |
| IMAGp998J20593  | PSD3   | ADP-ribosylation factor guanine nucleotide factor 6 (EFA6R), mRNA                       | NM_015310 | 23362 | 0.2   | -0.26 | 0.11  | -0.11 | -0.11 | -0.29 | 0.02  | -     | 0.04  | 0.24  | -0.23 | -0.04 | 0.04  | -0.15 | 0.33  | 1.33 | 0.96 | 1.1  | 1.29  |
| IMAGp998L101118 | PSMA3  | proteasome (prosome, macropain) subunit, alpha type, 3 (PSMA3), transcript variant 1, m | NM_002788 | 5684  | -0.91 | -0.41 | -1.03 | -0.55 | -     | 0.84  | -1.21 | -0.24 | 0.34  | -0.61 | 0.13  | 0.19  | 0.04  | 0.12  | -0.56 | 0.74 | 1.13 | 0.2  |       |
|                 |        |                                                                                         |           |       |       |       | 0.69  |       |       |       |       |       |       |       |       |       |       |       |       |      |      |      |       |
| IMAGp998H16402  | PSMA5  | proteasome (prosome, macropain) subunit, alpha type, 5 (PSMA5), mRNA                    | NM_002790 | 5686  | -0.17 | -0.52 | -0.21 | -0.5  | -0.18 | -0.76 | 0.21  | -     | 0.06  | -0.06 | -0.46 | 0.65  | -0.06 | 0.41  | -0.29 | 1.27 | 0.89 | 0.6  | 1.15  |
| IMAGp998F042585 | PSMA5  | proteasome (prosome, macropain) subunit, alpha type, 5 (PSMA5), mRNA                    | NM_002790 | 5686  | -0.52 | -0.42 | -0.54 | -0.27 | -0.07 | 0.12  | 0.14  | -     | 0.01  | -0.2  | -0.1  | -0.21 | -0.43 | 0.38  | -0.36 | 1.26 | 0.88 | 1.2  | 0.59  |
| IMAGp998N22698  | PSMA6  | proteasome (prosome, macropain) subunit, alpha type, 6 (PSMA6), mRNA                    | NM_002791 | 5687  | -0.33 | -0.59 | -0.57 | -0.48 | -0.53 | -0.17 | 0.08  | -     | 0.21  | -0.43 | -0.12 | 0.16  | -0.02 | 0.29  | -0.33 | 0.58 | 0.57 | 0.1  | 0.36  |
| IMAGp998E231726 | PSMC1  | proteasome (prosome, macropain) 26S subunit, ATPase, 1 (PSMC1), mRNA                    | NM_002802 | 5700  | -0.3  | -0.86 | -0.31 | -0.74 | -0.43 | -0.59 | 0.33  | -     | 0.24  | 0.11  | 0.01  | 0.49  | -0.13 | 0.44  | -0.02 | 1.23 | 0.87 | 0.4  | 0.57  |
| IMAGp998H07420  | PSMC2  | proteasome (prosome, macropain) 26S subunit, ATPase, 2 (PSMC2), mRNA                    | NM_002803 | 5701  | -0.74 | -0.55 | -0.96 | -0.56 | -0.48 | -0.81 | -0.12 | -     | 0.2   | -0.24 | -0.18 | -0.48 | 0.16  | 0.28  | -0.59 | 0.49 | 1.2  | 0.1  | -0.05 |
| IMAGp998K02101  | PSMC2  | proteasome (prosome, macropain) 26S subunit, ATPase, 2 (PSMC2), mRNA                    | NM_002803 | 5701  | -0.75 | -0.4  | -1.04 | -0.41 | -1.25 | -0.32 | -0.06 | -     | 0.26  | -0.92 | -0.16 | -0.35 | 0.2   | 0.15  | -0.57 | 0.93 | 1.16 | 0.9  | 0.72  |
| IMAGp998P2197   | PSMD1  | proteasome (prosome, macropain) 26S subunit, non-ATPase, 1 (PSMD1), mRNA                | NM_002807 |       | -1.7  | -0.59 | -1.72 | -0.84 | -0.81 | -1.54 | 0.05  | -     | 0.13  | -0.32 | 0.07  | -0.49 | -0.37 | 0.39  | -0.65 | 1.58 | 1.82 | 1.9  | 0.98  |
| IMAGp998C201163 | PTK9   | PTK9 protein tyrosine kinase 9 (PTK9), transcript variant 2, mRNA                       | NM_198974 | 5756  | -0.26 | -0.6  | -0.24 | -0.31 | -0.16 | -0.45 | 0.21  | -     | 0.2   | -0.09 | 0.28  | -0.21 | 0.32  | -0.04 | 0.09  | 0.53 | 0.47 | 0.9  | 1.35  |
| IMAGp998N01880  | PTPDC1 | Protein tyrosine phosphatase domain containing 1                                        | 138639    |       | -0.12 | -0.52 | -0.83 | -1.15 | -0.72 | -0.49 | 0.57  | 0.53  | -0.1  | -     | 0.42  | -0.64 | 0.17  | 0.52  | -0.56 | 1.52 | 1.12 | 1.2  | 0.61  |

























|                 |               |                                                                       |        |           |       |       |       |       |       |       |       |       |       |       |       |      |
|-----------------|---------------|-----------------------------------------------------------------------|--------|-----------|-------|-------|-------|-------|-------|-------|-------|-------|-------|-------|-------|------|
| IMAGp998D05381  | C9orf52       | Chromosome 9 open reading frame 52                                    | 158219 | 0.46      | 0.17  | 0.33  | 0.3   | 0.36  | 0.87  | 0.03  | -0.18 | 0.06  | 0.06  | -0.69 | -0.07 |      |
|                 |               |                                                                       |        | 0.04      | 0.07  | -0.02 | -0.1  | -0.6  | -0.27 |       |       |       |       |       |       |      |
| IMAGp998M06198  | CCL5          | chemokine (C-C motif) ligand 5 (CCL5), mRNA                           |        | NM_002985 |       | 0.12  | 0.74  | 0.14  | 0.64  | 0.63  | 0.92  | -0.23 | 0.03  | -0.01 |       |      |
|                 |               |                                                                       |        | 0.4       | -0.29 | -0.09 | -0.19 | -0.07 | -0.14 | -0.1  | -0.5  | -0.15 |       |       |       |      |
| IMAGp998E10534  | CCR6          | chemokine (C-C motif) receptor 6 (CCR6), transcript variant 2, mRNA   |        | NM_031409 | 1235  | 0.26  | 0.39  | 0.12  | 0.63  | 0.63  | 0.52  | -0.3  |       |       |       |      |
|                 |               |                                                                       |        | 0.06      | -0.08 | 0.31  | -0.11 | -0.21 | -0.15 | -0.05 | -0.31 | -0.11 | -0.6  | -1.28 |       |      |
| IMAGp998A032401 | CHRNA5        | Cholinergic receptor, nicotinic, alpha polypeptide 5                  |        | 1138      | 0.23  | 0.69  | 0.09  | 0.4   | 0.67  | 0.12  | -0.05 | 0     | 0.05  | 0.17  | -     |      |
|                 |               |                                                                       |        | 0.28      | -0.04 | -0.06 | -0.2  | -0.15 | -0.12 | 0     | 0.14  |       |       |       |       |      |
| IMAGp998I181818 | CHST12        | carbohydrate (chondroitin 4) sulfotransferase 12 (CHST12), mRNA       |        | NM_018641 | 55501 | 0     | 0.19  | 0.1   | 0.48  | 0.08  | 0.19  | -0.16 | -     |       |       |      |
|                 |               |                                                                       |        | 0.09      | -0.13 | 0.08  | 0.3   | -0.26 | -0.12 | -0.2  | -0.39 | -0.11 | -0.3  | -0.44 |       |      |
| IMAGp998J181863 | CLASP2        | Cytoplasmic linker associated protein 2                               |        | 23122     | 0.03  | 0.93  | 0.18  | 0.75  | 0.66  | 0.38  | -0.19 | 0.03  | -0.04 | 0.27  | 0.14  | -    |
|                 |               |                                                                       |        | 0.16      | -0.16 | -0.13 | -0.27 | -0.22 | -0.7  | -1.28 |       |       |       |       |       |      |
| IMAGp998L05129  | DELGEF        | Deafness locus associated putative guanine nucleotide exchange factor |        | 26297     | 0.38  | 0.15  | 0.4   | 0.49  | 0.68  | 0.17  |       |       |       |       |       |      |
|                 |               |                                                                       |        | 0.04      | -0.28 | 0.23  | -0.26 | 0.16  | -0.36 | 0.14  | -0.04 | -0.47 | -0.41 | -1.3  | -0.93 |      |
| IMAGp998F04889  | DKFZP566D1346 | Ankyrin repeat domain 13C                                             |        | 81573     | 0.16  | 0.43  | 0.01  | 0.43  | 0.44  | 0.69  | -0.05 | -0.07 | 0.11  | 0.05  | -0.17 | 0.09 |
|                 |               |                                                                       |        | 0.01      | -0.08 | -0.08 | -0.09 | -0.9  | -0.76 |       |       |       |       |       |       |      |
| IMAGp998G15621  | DKFZp762K222  | Storkhead box 2                                                       |        | 56977     | 0.11  | 0.4   |       |       |       |       |       |       |       |       |       |      |
|                 |               |                                                                       |        | 0.08      | 0.51  | 0.58  | 0.73  | -0.22 | -0.09 | -0.02 | 0.22  | 0.08  | -0.19 | -0.13 | -0.16 | -    |
|                 |               |                                                                       |        | 0.17      | -0.29 | -0.6  | -0.33 |       |       |       |       |       |       |       |       |      |
| IMAGp998N21660  | DUSP10        | dual specificity phosphatase 10 (DUSP10), transcript variant 1, mRNA  |        | NM_007207 |       | 0.34  | 0.14  | 0.28  | 0.32  | 0.58  |       |       |       |       |       |      |
|                 |               |                                                                       |        | 1.16      | -0.05 | -0.12 | 0.05  | -0.02 | -0.17 | -0.27 | -0.01 | 0.04  | 0.04  | -0.08 | -0.1  | -    |
|                 |               |                                                                       |        | 0.3       |       |       |       |       |       |       |       |       |       |       |       |      |
| IMAGp998J08399  | EPB41         | Erythrocyte membrane protein band 4.1 (elliptocytosis 1, RH-linked)   |        | 2035      | 0.05  | 0.52  | 0.1   | 0.57  | -0.14 | 1.14  | -0.08 | -0.06 | -0.07 |       |       |      |
|                 |               |                                                                       |        | 0.33      | -0.41 | 0     | -0.57 | -0.25 | -0.31 | -0.14 | -1.1  | -0.91 |       |       |       |      |
| IMAGp998K05979  | EPB41L4B      | Erythrocyte membrane protein band 4.1 like 4B                         |        | 54566     | 0.14  | 0.51  | -0.03 | 0.46  | 0.37  | 0.36  | -0.21 | 0     | 0.07  | 0.05  | -0.08 | -    |
|                 |               |                                                                       |        | 0.21      | -0.06 | -0.03 | -0.54 | 0.01  | -0.4  | -0.09 |       |       |       |       |       |      |
| IMAGp998O02587  | FEZ2          | fasciculation and elongation protein zeta 2 (zygin II) (FEZ2), mRNA   |        | NM_005102 |       | 0.42  | 0.38  | 0.34  | 0.65  | 1     | 1.23  | -0.05 | -     |       |       |      |
|                 |               |                                                                       |        | 0.03      | 0     | 0.7   | -0.09 | 0.16  | -0.12 | -0.09 | -0.22 | -0.24 | -0.1  | -0.88 |       |      |
| IMAGp998H09834  | FLJ10996      | Hypothetical protein FLJ10996                                         |        | 54520     | 0.27  |       |       |       |       |       |       |       |       |       |       |      |
|                 |               |                                                                       |        | 0.29      | 0.17  | 0.46  | 0.49  | 0.61  | -0.19 | 0.08  | -0.07 | 0.24  | -0.1  | 0.02  | -0.11 | -    |
|                 |               |                                                                       |        | 0.03      | -0.08 | -0.04 | -0.6  | -0.5  |       |       |       |       |       |       |       |      |
| IMAGp998A24829  | FLJ14011      | Zinc finger protein 667                                               |        | 63934     | 0.53  | 0.25  |       |       |       |       |       |       |       |       |       |      |
|                 |               |                                                                       |        | 0.26      | -0.41 | 0.4   | -0.1  |       |       |       |       |       |       |       |       |      |
| IMAGp998I20742  | FLJ32130      | Hypothetical protein FLJ32130                                         |        | 146540    |       |       |       |       |       |       |       |       |       |       |       |      |
|                 |               |                                                                       |        | 0.44      | 0.23  | 0.16  | 0.51  | 0.35  | 0.62  | -0.1  | 0.03  | -0.1  | 0.31  | 0.34  | -0.09 | -    |
|                 |               |                                                                       |        | 0.08      | 0.04  | -0.12 | -0.01 | -0.3  | -0.03 |       |       |       |       |       |       |      |
| IMAGp998I1581   | FOXO3A        | forkhead box O3A (FOXO3A), transcript variant 1, mRNA                 |        | NM_001455 | 2309  | 0.18  | 1.03  | 0.96  | 1.09  | 1.26  | 1.4   | -0.43 | -0.06 | -0.99 | -     |      |
|                 |               |                                                                       |        | 0.41      | -0.56 | -0.86 | -0.58 | -0.34 | 0.56  | 0.78  | 0.2   | 0.07  |       |       |       |      |
| IMAGp998B16657  | FUBP3         | Far upstream element (FUSE) binding protein 3                         |        | 8939      | 0.3   | 0.38  | 0.18  | 0.31  | 0.13  | 0.72  | 0.02  | -0.09 | 0.13  | -0.07 | 0.12  |      |
|                 |               |                                                                       |        | 0.08      | 0.01  | 0     | -0.4  | -0.04 | -0.8  | -0.22 |       |       |       |       |       |      |



|                 |          |                                                                              |        |       |       |       |       |       |       |        |       |       |   |
|-----------------|----------|------------------------------------------------------------------------------|--------|-------|-------|-------|-------|-------|-------|--------|-------|-------|---|
| 0.47            | 0.82     | -0.1                                                                         | 0.09   | -0.08 | -0.12 | 0     | -0.21 | -0.13 | -0.06 | -0.21  | -0.04 | -     |   |
| 0.6             | -0.88    |                                                                              |        |       |       |       |       |       |       |        |       |       |   |
| IMAGp998P2179   | METTL4   | Methyltransferase like 4                                                     |        |       |       |       |       |       |       | 64863  | 0.26  |       |   |
| 0.36            | 0.11     | 0.59                                                                         | 0.39   | 0.5   | -0.16 | 0.1   | -0.04 | 0.62  | 0.12  | 0.08   | -0.1  | -     |   |
| 0.09            | -0.19    | -0.06                                                                        | -0.2   | -0.81 |       |       |       |       |       |        |       |       |   |
| IMAGp998H08543  | MGC26744 | Hypothetical protein MGC26744                                                |        |       |       |       |       |       |       | 132989 |       |       |   |
| 0.18            | 0.55     | 0.17                                                                         | 0.48   | 0.28  | 0.37  | 0     | -0.28 | -0.04 | -0.16 | -0.19  | 0.15  | -     |   |
| 0.08            | -0.03    | -0.09                                                                        | -0.3   | -0.7  | -0.71 |       |       |       |       |        |       |       |   |
| IMAGp998E08884  | MGC29898 | Hypothetical protein MGC29898                                                |        |       |       |       |       |       |       | 133015 |       |       |   |
| 0.2             | 0.5      | 0.11                                                                         | 0.35   | 0.48  | 0.7   | -0.04 | 0.38  | -0.17 | 0.11  | -0.28  | -0.3  | -     |   |
| 0.18            | -0.04    | -0.04                                                                        | 0.06   | -0.1  | -0.56 |       |       |       |       |        |       |       |   |
| IMAGp998I1088   | MINK1    | Misshapen-like kinase 1 (zebrafish)                                          |        |       |       |       |       |       |       | 50488  | 0.31  |       |   |
| 0.3             | 0.19     | 0.42                                                                         | 0.43   | 0.02  | -0.28 | 0.19  | -0.17 | -0.14 | 0.15  | -0.29  | -0.1  | -     |   |
| 0.05            | -0.2     | 0.08                                                                         | 0      | -0.16 |       |       |       |       |       |        |       |       |   |
| IMAGp998A13664  | M-RIP    | Myosin phosphatase-Rho interacting protein                                   |        |       |       |       |       |       |       |        |       |       |   |
| 23164           | 0.31     | 0.23                                                                         | 0.21   | 0.37  | 0.41  | 0.51  | -0.15 | -0.04 | -0.02 | 0      | 0.07  |       |   |
| 0.04            | -0.05    | 0.06                                                                         | 0.02   | -0.35 | -0.6  | 0.17  |       |       |       |        |       |       |   |
| IMAGp998D243847 | MRPL19   | Mitochondrial ribosomal protein L19                                          |        |       |       |       |       |       |       | 9801   |       |       |   |
| 0.39            | 0.11     | 0.23                                                                         | 0.62   | 0.26  | 0.32  | -0.13 | 0.01  | -0.11 | -0.26 | 0.13   | -0.3  | -     |   |
| 0.13            | -0.12    | -0.48                                                                        | -0.45  | -1.2  | -0.34 |       |       |       |       |        |       |       |   |
| IMAGp998G142011 | MTHFD2L  | Methylenetetrahydrofolate dehydrogenase (NADP+ dependent) 2-like             | 441024 | 0.55  | 0.23  | 0.5   | 0.76  | 0.38  | 0.56  | -0.17  | -     |       |   |
| 0.04            | 0        | 0.44                                                                         | 0.26   | 0.26  | -0.12 | -0.07 | -0.34 | -0.3  | 0.4   | -0.11  |       |       |   |
| IMAGp998N0586   | MYO1D    | Myosin ID                                                                    | 4642   | 0.24  | 0.16  | 0.01  | 0.59  | 0.64  |       |        |       |       |   |
| 0.64            | -0.13    | 0                                                                            | -0.02  | -0.24 | -0.18 | -0.25 | -0.05 | -0.13 | -0.17 | -0.1   | -0.1  | -     |   |
| 0.74            |          |                                                                              |        |       |       |       |       |       |       |        |       |       |   |
| IMAGp998J211113 | MYO1E    | myosin IE (MYO1E), mRNA NM_004998                                            | 4643   | 0.25  | 0.14  |       |       |       |       |        |       |       |   |
| 0.24            | 0.07     | 0.28                                                                         | 0.18   | -0.29 | -0.64 | -0.39 | -0.48 | -0.35 | -0.24 | -0.21  | 0.32  | -     |   |
| 0.12            | -0.31    | -0.4                                                                         | -0.22  |       |       |       |       |       |       |        |       |       |   |
| IMAGp998L02540  | NDRG1    | N-myc downstream regulated gene 1 (NDRG1), mRNA NM_006096                    | 10397  | 0.58  | 0.5   | 0.32  | 0.67  | 1.22  | 1.42  | -0.02  | 0.2   | -0.51 | - |
| 0.23            | -0.01    | -0.54                                                                        | -0.54  | 0.39  | -0.23 | -0.42 | -0.7  | -0.88 |       |        |       |       |   |
| IMAGp998B1793   | NEDD1    | Neural precursor cell expressed, developmentally down-regulated 1            | 121441 | 0.16  | 0.45  | 0.08  | 0.61  | 0.35  | 0.42  | -0.21  | 0.07  | -     |   |
| 0.25            | 0.19     | 0.32                                                                         | 0.24   | -0.16 | -0.1  | -0.26 | -0.13 | -1    | -0.98 |        |       |       |   |
| IMAGp998P0888   | NFIA     | Nuclear factor I/A                                                           | 4774   | 0.05  | 0.59  | 0.37  |       |       |       |        |       |       |   |
| 0.9             | 0.35     | 0.33                                                                         | -0.09  | 0.04  | -0.17 | -0.14 | -0.34 | -0.06 | -0.12 | -0.11  | -0.53 | -     |   |
| 0.24            | -0.6     | -0.95                                                                        |        |       |       |       |       |       |       |        |       |       |   |
| IMAGp998M06127  | NT5C2    | 5'-nucleotidase, cytosolic II                                                | 22978  | 0.15  | 0.21  |       |       |       |       |        |       |       |   |
| 0.13            | 0.64     | 0.54                                                                         | 0.24   | -0.09 | 0.05  | -0.04 | -0.09 | 0.27  | -0.22 | -0.22  | 0.06  | -     |   |
| 0.47            | -0.09    | -0.1                                                                         | -0.45  |       |       |       |       |       |       |        |       |       |   |
| IMAGp998P17131  | OIT3     | Oncoprotein induced transcript 3                                             | 170392 |       |       |       |       |       |       |        |       |       |   |
| 0.45            | 0.16     | 0.33                                                                         | 0.42   | 0.59  | 0.64  | 0.07  | -0.08 | 0.06  | -0.05 | -0.2   | 0.17  | -     |   |
| 0.08            | 0.14     | -0.02                                                                        | -0.15  | 0.3   | -0.48 |       |       |       |       |        |       |       |   |
| IMAGp998M232973 | PAIP2    | Poly(A) binding protein interacting protein 2                                |        |       |       |       |       |       |       |        |       |       |   |
| 51247           | 0.5      | 0.73                                                                         | 0.48   | 0.76  | 0.75  | 1.04  | 0.25  | 0.19  | 0.01  | -0.05  | -0.14 |       |   |
| 0.46            | -0.08    | 0.04                                                                         | 0.21   | 0.06  | -0.5  | -0.23 |       |       |       |        |       |       |   |
| IMAGp998I09473  | PARD3    | Par-3 partitioning defective 3 homolog (C. elegans)                          |        |       |       |       |       |       |       |        |       |       |   |
| 56288           | 0        | 0.72                                                                         | -0.08  | 0.67  | 0.49  | 0.7   | -0.15 | 0.08  | -0.14 | 0.1    | 0.07  |       |   |
| 0.05            | -0.17    | -0.17                                                                        | -0.9   | -0.16 | -1.6  | -1.13 |       |       |       |        |       |       |   |
| IMAGp998I18782  | PDE5A    | Phosphodiesterase 5A, cGMP-specific                                          | 8654   | 0.3   |       |       |       |       |       |        |       |       |   |
| 0.73            | 0.5      | 0.54                                                                         | 0.28   | 0.5   | 0     | -0.02 | -0.04 | -0.23 | -0.17 | 0.21   | -0.14 | -     |   |
| 0.31            | -0.59    | -0.35                                                                        | 0.2    | 0.18  |       |       |       |       |       |        |       |       |   |
| IMAGp998K05397  | PIP3AP   | phosphatidylinositol-3-phosphate associated protein (PIP3AP), mRNA NM_019061 |        |       |       |       |       |       |       |        |       |       |   |
| 0.02            | 0        | -0.11                                                                        | -0.1   | -0.2  | -0.15 | 0.01  | 0.02  | 0.05  | -0.09 | 0      | -0.1  | -     |   |

|                 |         |                                                                                      |       |       |       |       |       |       |       |       |       |       |   |
|-----------------|---------|--------------------------------------------------------------------------------------|-------|-------|-------|-------|-------|-------|-------|-------|-------|-------|---|
| IMAGp998E22463  | PLXNA2  | Plexin A2                                                                            | 5362  | -0.12 | 0.81  | 0.32  | 0.8   |       |       |       |       |       |   |
| 0.79            | 0.94    | -0.69                                                                                | 0.04  | -0.15 | -0.21 | -1.67 | -0.31 | -0.38 | -0.14 | -0.38 | 0.05  | -     |   |
| 0.1             | -0.39   |                                                                                      |       |       |       |       |       |       |       |       |       |       |   |
| IMAGp998N0583   | PPID    | peptidylprolyl isomerase D (cyclophilin D) (PPID), mRNA                              |       |       |       |       |       |       |       |       |       |       |   |
| NM_005038       |         |                                                                                      | 0.3   | 0.22  | 0.1   | 0.47  | 0.31  | 0.45  | -0.15 | 0.09  | -0.03 |       |   |
| 0.32            | 0.19    | 0.01                                                                                 | -0.15 | 0.03  | -0.1  | -0.06 | -0.4  | -0.82 |       |       |       |       |   |
| IMAGp998F235575 | PSEN1   | Presenilin 1 (Alzheimer disease 3)                                                   |       |       |       |       |       |       | 5663  | 0.25  |       |       |   |
| 0.15            | 0.74    | 0.84                                                                                 | 1.16  | 0.63  | -0.04 | 0.28  | -0.13 | -0.03 | -0.11 | -0.24 | -0.2  | -     |   |
| 0.07            | 0.15    | -0.25                                                                                | -0.2  | -0.85 |       |       |       |       |       |       |       |       |   |
| IMAGp998C1818   | PSMD3   | Proteasome (prosome, macropain) 26S subunit, non-ATPase, 3                           |       |       |       |       |       |       |       |       |       |       |   |
| 3               | 5709    |                                                                                      | 0.36  | 0.32  | 0.22  | 0.4   | 0.5   | 1.05  | -0.07 | -0.07 | 0.14  | 0.06  | - |
| 0.64            | -0.25   | 0.03                                                                                 | -0.01 | -0.17 | -0.2  | -0.4  | -0.36 |       |       |       |       |       |   |
| IMAGp998B24243  | RAI     | RelA-associated inhibitor (RAI), mRNA                                                |       |       |       |       |       |       |       |       |       |       |   |
| 2817            | -0.23   |                                                                                      | 0.85  | -0.15 | 0.75  | 1.44  | 1.15  | -0.44 | -0.06 | -0.85 | -0.46 | -1.47 | - |
| 0.39            | -0.26   | -0.49                                                                                | -0.1  | -0.27 | -0.5  | -1.06 |       |       |       |       |       |       |   |
| IMAGp998G24524  | RBM5    | RNA binding motif protein 5                                                          |       |       |       |       |       |       | 10181 | 0.08  | 0.8   |       |   |
| 0.11            | 0.7     | 0.51                                                                                 | 0.63  | -0.19 | 0.05  | 0.14  | 0.19  | -0.36 | 0.26  | -0.09 | -0.1  | -     |   |
| 0.31            | -0.06   | -0.2                                                                                 | -0.02 |       |       |       |       |       |       |       |       |       |   |
| IMAGp998A211017 | REERG   | RAS-like, estrogen-regulated, growth inhibitor                                       |       |       |       |       |       |       |       |       |       |       |   |
| 85004           | -0.14   | 0.93                                                                                 | 0.24  | 1.03  | 0.32  | 0.93  | -0.15 | 0.34  | 0     | 0.23  | -0.24 |       |   |
| 0.11            | -0.29   | -0.08                                                                                | -0.72 | -0.31 | 0     | -1.2  |       |       |       |       |       |       |   |
| IMAGp998E161159 | RGC32   | response gene to complement 32 (RGC32), mRNA                                         |       |       |       |       |       |       |       |       |       |       |   |
| NM_014059       |         |                                                                                      | 28984 | 0.59  | 0.82  | 0.73  | 0.68  | 0.74  | 0.58  | -0.39 | -0.23 | -0.42 |   |
| 0.15            | 0.36    | -0.03                                                                                | -0.11 | 0.21  | -0.34 | -0.43 | 0     | -0.34 |       |       |       |       |   |
| IMAGp998H184004 | RHBDF1  | rhomboid family 1 (Drosophila) (RHBDF1), mRNA                                        |       |       |       |       |       |       |       |       |       |       |   |
| NM_022450       |         |                                                                                      | 64285 | 0.47  | 0.64  | 0.39  | 0.85  | 0.82  | 1.1   | -0.1  | 0.53  | 0.16  | - |
| 0.19            | 0.43    | 0.52                                                                                 | -0.4  | -0.04 | -0.19 | -0.04 | 0.3   | 0.19  |       |       |       |       |   |
| IMAGp998N03471  | ROD1    | ROD1 regulator of differentiation 1 (S. pombe)                                       |       |       |       |       |       |       |       |       |       |       |   |
| 9991            | 0.02    | 0.56                                                                                 | 0.4   | 0.43  | 0.1   | 0.54  | 0.12  | -0.1  | 0.14  | 0.06  | -0.46 |       |   |
| 0.07            | -0.03   | -0.14                                                                                | -0.14 | -0.24 | 0     | -0.21 |       |       |       |       |       |       |   |
| IMAGp998A23415  | RPE     | Ribulose-5-phosphate-3-epimerase                                                     |       |       |       |       |       |       |       |       |       |       |   |
| 0.33            | 0.08    | 0.23                                                                                 | 0.46  | 0.15  | -0.17 | -0.04 | 0.17  | -0.13 | 0.19  | 0.03  | -0.13 | -     |   |
| 0.01            | -0.06   | -0.09                                                                                | -0.5  | -0.31 |       |       |       |       |       |       |       |       |   |
| IMAGp998N11599  | SART2   | Squamous cell carcinoma antigen recognized by T cells 2                              |       |       |       |       |       |       |       |       |       |       |   |
| 29940           |         |                                                                                      | 0.14  | 0.42  | 0.11  | 0.35  | 0.3   | 0.54  | -0.14 | 0.11  | -0.01 | 0.06  |   |
| 0.02            | 0.07    | -0.2                                                                                 | -0.09 | -0.18 | -0.08 | -0.7  | -0.74 |       |       |       |       |       |   |
| IMAGp998B01571  | SEC22L3 | SEC22 vesicle trafficking protein-like 3 (S. cerevisiae)                             |       |       |       |       |       |       |       |       |       |       |   |
| 9117            | 0.29    | 0.41                                                                                 | 0.28  | 0.51  | 0.21  | 0.95  | -0.19 | -0.02 | -0.01 |       |       |       |   |
| 0.51            | -0.24   | -0.45                                                                                | -0.08 | -0.11 | -0.15 | -0.08 | -0.4  | -0.11 |       |       |       |       |   |
| IMAGp998F0289   | SENP5   | SUMO1/sentrin specific peptidase 5                                                   |       |       |       |       |       |       |       |       |       |       |   |
| 0.12            | 0.48    | 0.11                                                                                 | 0.4   | 0.36  | 0.77  | -0.1  | 0.09  | -0.01 | 0.15  | -0.55 | -0.41 | -     |   |
| 0.03            | -0.03   | 0.07                                                                                 | -0.05 | -0.3  | -0.18 |       |       |       |       |       |       |       |   |
| IMAGp998G19373  | SH3MD1  | SH3 multiple domains 1                                                               |       |       |       |       |       |       |       |       |       |       |   |
| 0.04            | 0.76    | 0.75                                                                                 | 0.94  | -0.18 | 0.25  | -0.18 | -0.24 | -0.62 | 0     | -0.26 | -0.22 | -     |   |
| 0.59            | -0.24   | -0.4                                                                                 | 0.37  |       |       |       |       |       |       |       |       |       |   |
| IMAGp998E0481   | SH3TC2  | SH3 domain and tetratricopeptide repeats 2                                           |       |       |       |       |       |       |       |       |       |       |   |
| 79628           | 0.76    | 0.5                                                                                  | 0.16  | 0.98  | 0.3   | 1.23  | -0.11 | -0.03 | -0.07 | 0.12  | -0.17 | -     |   |
| 0.05            | -0.15   | -0.18                                                                                | -0.64 | -0.48 | -0.4  | -0.16 |       |       |       |       |       |       |   |
| IMAGp998A18186  | SLC2A11 | solute carrier family 2 (facilitated glucose transporter), member 11 (SLC2A11), mRNA |       |       |       |       |       |       |       |       |       |       |   |
| NM_030807       |         |                                                                                      | 66035 | 0.2   | 0.48  | 0.29  |       |       |       |       |       |       |   |
| 0.57            | 0.46    | 0.44                                                                                 | 0.09  | -0.11 | 0.04  | 0.03  | 0.13  | -0.42 | -0.09 | -0.1  | -0.14 | -     |   |
| 0.19            | -0.5    | -0.53                                                                                |       |       |       |       |       |       |       |       |       |       |   |
| IMAGp998K16661  | SLC35A1 | Solute carrier family 35 (CMP-sialic acid transporter), member A1                    |       |       |       |       |       |       |       |       |       |       |   |
| 10559           | 0.18    | 0.55                                                                                 | 0.17  | 0.52  | 0.46  | 0.94  | -0.11 |       |       |       |       |       |   |
| 0.07            | -0.07   | -0.12                                                                                | 0.56  | -0.11 | -0.15 | -0.06 | -0.08 | -0.03 | -0.1  | -0.06 |       |       |   |

|                 |         |                                                                                         |           |       |
|-----------------|---------|-----------------------------------------------------------------------------------------|-----------|-------|
| IMAGp998B11375  | SLC38A2 | Solute carrier family 38, member 2                                                      | 54407     | -     |
| 0.14            | 0.91    | 0.01                                                                                    | 0.67      | 0.67  |
| 0.38            | -0.43   | -0.44                                                                                   | -1.7      | -0.44 |
| IMAGp998O16368  | SLC6A16 | Solute carrier family 6, member 16                                                      | 28968     |       |
| 0.55            | 0.1     | 0.21                                                                                    | 0.22      | 0.25  |
| 0.14            | -0.13   | -0.24                                                                                   | -0.06     | 0.1   |
| IMAGp998K13329  | SMC6L1  | SMC6 structural maintenance of chromosomes 6-like 1 (yeast)                             | 79677     | 0.16  |
| 0.16            | -0.16   | -0.42                                                                                   | -0.08     | -0.08 |
| IMAGp998J18119  | SNAPC3  | Small nuclear RNA activating complex, polypeptide 3, 50kDa                              | 6619      | 0.27  |
| 0.05            | -0.01   | -0.08                                                                                   | -0.16     | 0     |
| IMAGp998F2189   | STK38   | Serine/threonine kinase 38                                                              | 11329     | 0.39  |
| 0.2             | 0.46    | 0.57                                                                                    | 0.5       | -0.05 |
| 0.04            | -0.05   | -0.5                                                                                    | -0.22     |       |
| IMAGp998K032011 | SYNE2   | spectrin repeat containing, nuclear envelope 2 (SYNE2), transcript variant 1, mRNA      | NM_015180 | 0.4   |
| 1.04            | 0.01    | -0.11                                                                                   | 0.16      | 0.08  |
| 0.43            |         |                                                                                         |           | 0.6   |
| IMAGp998G06652  | TF      | transferrin (TF), mRNA                                                                  | NM_001063 | 0.22  |
| 0.03            | 0.75    | 0.27                                                                                    | 0.42      | -0.09 |
| 0.32            | 0       | -0.53                                                                                   |           |       |
| IMAGp998O2195   | THBS2   | thrombospondin 2                                                                        | NM_003247 | 7058  |
| 0.7             | 0.58    | 0.59                                                                                    | -0.37     | 0.15  |
| 0.18            | 0.2     | -0.08                                                                                   |           |       |
| IMAGp998M16110  | TIRAP   | toll-interleukin 1 receptor (TIR) domain containing adaptor protein (TIRAP), transcript | NM_052887 | 0.27  |
| 0.1             | 0.37    | -0.02                                                                                   | 0.27      | -0.02 |
| 1.4             | -1.19   |                                                                                         |           |       |
| IMAGp998M081088 | TPX2    | TPX2, microtubule-associated, homolog (Xenopus laevis)                                  | 22974     | 0.09  |
| 0.25            | 0.02    | -0.17                                                                                   | 0.01      | -0.55 |
| IMAGp998P051746 | TTC5    | tetratricopeptide repeat domain 5 (TTC5), mRNA                                          | NM_138376 | 0.32  |
| 0.35            | -0.03   | 0                                                                                       | 0.11      | -0.21 |
| IMAGp998E15834  | TTC8    | Tetratricopeptide repeat domain 8                                                       | 123016    |       |
| 0.15            | 0.43    | -0.04                                                                                   | 0.37      | 0.37  |
| 0.19            | 0.01    | 0.02                                                                                    | 0.04      | -0.3  |
| IMAGp998E01600  | TXNRD3  | Thioredoxin reductase 3                                                                 | 114112    | 0.45  |
| 0.37            | 0.34    | 0.58                                                                                    | 0.22      | 1.05  |
| 0.04            | -0.17   | -0.21                                                                                   | -0.9      | -0.9  |
| IMAGp998I17587  | TYR     | Tyrosinase (oculocutaneous albinism IA)                                                 | 7299      |       |
| 0.3             | 0.52    | 0.06                                                                                    | 0.56      | 0.26  |
| 0.03            | 0.01    | -0.37                                                                                   | -0.13     | -0.4  |
| IMAGp998D03381  | UACA    | Uveal autoantigen with coiled-coil domains and ankyrin repeats                          | 55075     | 0.04  |
| 0.02            | -0.45   | -0.06                                                                                   | -0.19     | -0.12 |
| IMAGp998J19112  | WSB1    | WD repeat and SOCS box-containing 1                                                     | 26118     | 0.15  |
| 0.32            | 0.23    | 0.53                                                                                    | 0.29      | 0.33  |
| 0.03            | -0.48   | -0.03                                                                                   | -0.7      | -0.51 |
| IMAGp998I11419  | ZBTB1   | Zinc finger and BTB domain containing 1                                                 | 22890     |       |
| 0.58            | 0.12    | 0.24                                                                                    | 0.18      | 0.27  |
| 0.02            | -0.01   | -0.72                                                                                   | -0.13     | -0.5  |
| IMAGp998M17783  | ZNF136  | zinc finger protein 136 (clone pHZ-20) (ZNF136), mRNA                                   | NM_003437 | 7695  |
| 0.08            | -0.16   | -0.12                                                                                   | -0.1      | -0.03 |

|                 |           |                                        |        |       |       |       |       |      |      |       |       |       |   |
|-----------------|-----------|----------------------------------------|--------|-------|-------|-------|-------|------|------|-------|-------|-------|---|
| IMAGp998B21281  | ZNF533    | Zinc finger protein 533                | 151126 | 1.21  |       |       |       |      |      |       |       |       |   |
|                 | 0.73      | 0.55                                   | 0.71   | 0.6   | 0.68  | 0.65  | -0.08 | 0.27 | 0.44 | -0.75 | -0.07 | -0.15 | - |
|                 | 0.21      | -0.2                                   | -0.19  | -0.4  | -1.33 |       |       |      |      |       |       |       |   |
| IMAGp998B052305 | ZNF563    | zinc finger protein 563 (ZNF563), mRNA |        |       |       |       |       |      |      |       |       |       |   |
|                 | NM_145276 |                                        |        | -0.07 | 0.24  | 0.37  | 0.49  | 0.56 | 0.78 | -0.18 | -0.44 | -0.34 | - |
|                 | 0.13      | -0.38                                  | -0.33  | -0.35 | 0.3   | -0.54 | -0.48 | -0.4 | 0.03 |       |       |       |   |
