# Supplementary material for: Molecular mechanisms of the antiangiogenic and antitumor effects of mycophenolic acid
Source: Oxford University Press journal article supplement (doi:10.1158/1535-7163.mct-08-0193), 2008-06-01
Supplement: 15357163mct080193-sup-mct-08-0193--suppl_table_3.pdf [file 15357163mct080193-sup-mct-08-0193--suppl_table_3.pdf]

| Clone Id        | Gene Name | Description                                                                               | Refseq     | GeneID     | HDMVEC_6h  | Fibro_6h  | U87_6h  |       |       |           |       |       |       |
|-----------------|-----------|-------------------------------------------------------------------------------------------|------------|------------|------------|-----------|---------|-------|-------|-----------|-------|-------|-------|
|                 | HDMVEC_6h | HDMVEC_12h                                                                                | HDMVEC_12h | HDMVEC_12h | HDMVEC_12h | Fibro_6h  | U87_6h  |       |       |           |       |       |       |
|                 | Fibro_6h  | Fibro_12h                                                                                 | Fibro_12h  | Fibro_12h  | Fibro_12h  | Fibro_12h | U87_6h  |       |       |           |       |       |       |
|                 | U87_6h    | U87_12h                                                                                   | U87_12h    | U87_12h    | U87_12h    | U87_12h   | U87_12h |       |       |           |       |       |       |
| IMAGp998L05332  | ABCC8     | ATP-binding cassette, sub-family C (CFTR/MRP), member 8                                   |            |            |            |           |         |       |       |           |       |       |       |
|                 | NM_000352 | 6833                                                                                      | -0.17      | 0.12       | -0.48      | 0.15      | 0.1     | 0.18  | -0.5  | -0.39     | -0.47 | -     |       |
| 0.3             | -0.9      | -0.37                                                                                     | 0          | -0.17      | 0          | 0.39      | 0.8     | 0.41  |       |           |       |       |       |
| IMAGp998I235646 | ACTG1     | actin, gamma 1                                                                            |            | NM_001614  | 71         | 0.16      | -0.26   | -0.59 | -     |           |       |       |       |
| 1.77            | -1.11     | -0.79                                                                                     | -0.46      | 0.17       | -0.54      | -0.97     | 1.04    | 0.18  | -0.02 | 0.36      | 1.46  | 0.99  |       |
|                 | 0.4       | 0.7                                                                                       |            |            |            |           |         |       |       |           |       |       |       |
| IMAGp998C21738  | ACTG1     | actin, gamma 1                                                                            |            | 71         | 0.34       | -0.23     | -0.38   | -0.61 | -     |           |       |       |       |
| 0.1             | -0.55     | 0.38                                                                                      | -0.53      | 0.3        | -0.54      | -0.37     | 0.13    | -0.1  | 0.39  | 1.19      | 0.66  | 0.1   |       |
|                 | 0.99      |                                                                                           |            |            |            |           |         |       |       |           |       |       |       |
| IMAGp998C16233  | ADAM12    | a disintegrin and metalloproteinase domain 12 (meltrin alpha)                             |            | 8038       | -0.16      | 0.16      | -0.1    | -0.08 | -0.66 | 0.37      | -0.46 | -0.47 | -     |
| 1.01            | -0.54     | -1.65                                                                                     | -0.4       | -0.25      | 0.35       | 0.61      | 0.21    | -0.2  | 0.6   |           |       |       |       |
| IMAGp998P131933 | ADAT1     | adenosine deaminase, tRNA-specific 1                                                      |            |            |            |           |         |       |       |           |       |       | 23536 |
|                 | 0.33      | 0.38                                                                                      | 0.24       | 0.25       | 2.39       | 0.65      | 0.05    | 0.14  | -0.66 | -0.61     | -0.24 | -0.58 | -     |
| 0.21            | -0.08     | 1.02                                                                                      | 1.07       | 1.8        | 0.5        |           |         |       |       |           |       |       |       |
| IMAGp998H23972  | AFG3L1    | AFG3 ATPase family gene 3-like 1 (yeast)                                                  |            |            |            |           |         |       |       |           |       |       |       |
|                 | NM_001132 | 172                                                                                       | -0.65      | 0.15       | -0.92      | 0.2       | -0.07   | -0.66 | 0.01  | 0.46      | -0.27 |       |       |
|                 | 0.33      | 0.56                                                                                      | 0.52       | -0.53      | -0.22      | -0.62     | 0.01    | -0.7  | -0.38 |           |       |       |       |
| IMAGp998N211942 | AMACR     | alpha-methylacyl-CoA racemase                                                             |            |            |            |           |         |       |       | 23600     | -0.53 | 0.19  | -     |
| 0.16            | -0.15     | -0.43                                                                                     | -0.11      | 0.12       | 0.15       | 0.35      | 0.28    | 1.03  | 0.52  | -0.02     | -0.27 | 0.13  | -     |
|                 | 0.29      | -0.2                                                                                      | -0.02      |            |            |           |         |       |       |           |       |       |       |
| IMAGp998F181867 | ANKRA2    | ankyrin repeat, family A (RFXANK-like), 2                                                 |            |            |            |           |         |       |       |           |       |       |       |
|                 | 57763     | -0.78                                                                                     | 0.21       | 0.09       | -0.06      | -0.02     | -0.54   | 0.35  | 0.77  | 0.48      | 0.12  | 0.85  |       |
|                 | 0.3       | -0.09                                                                                     | -0.4       | 0.09       | 0.16       | -1        | -0.23   |       |       |           |       |       |       |
| IMAGp998K03526  | APH1A     | anterior pharynx defective 1 homolog A (C. elegans)                                       |            |            |            |           |         |       |       |           |       |       |       |
|                 | NM_016022 | 51107                                                                                     | 0.17       | 0.77       | -0.06      | 0.7       | 1       | 1.32  | -0.18 | -0.13     | -0.44 | -     |       |
| 0.12            | -0.49     | 0.06                                                                                      | -0.11      | -0.21      | 0.24       | 0.71      | 1.4     | 0.36  |       |           |       |       |       |
| IMAGp998J08460  | APOBEC3B  | apolipoprotein B mRNA editing enzyme, catalytic polypeptide-like 3B                       |            | 9582       | -0.26      | 0.11      | -0.28   | -0.09 | 0.01  | 0.16      | 0.17  |       |       |
|                 | 0.35      | 0.53                                                                                      | 0.69       | 0.42       | 0.18       | 0.19      | -0.45   | 0.34  | 0.33  | 0         | -0.32 |       |       |
| IMAGp998I132615 | AQP9      | aquaporin 9                                                                               |            | NM_020980  | 366        | 0.78      | 0.19    | -0.22 | -0.06 | -         |       |       |       |
| 0.09            | -0.05     | -0.18                                                                                     | -0.12      | -0.58      | -0.49      | -1.24     | -0.91   | 0.03  | -0.5  | 0.58      | 0.06  | 0.3   |       |
|                 | 0.48      |                                                                                           |            |            |            |           |         |       |       |           |       |       |       |
| IMAGp998A18727  | ARL4A     | ADP-ribosylation factor-like 4A                                                           |            |            |            |           |         |       |       | NM_005738 | 10124 | -     |       |
| 0.32            | 0.06      | -0.41                                                                                     | -0.01      | -0.32      | -0.09      | -0.56     | -0.57   | -0.45 | -0.63 | -1.16     | -0.33 | -0.07 |       |
|                 | 0.03      | 0.39                                                                                      | 0.28       | -0.4       | 0.09       |           |         |       |       |           |       |       |       |
| IMAGp998J011196 | ARL6IP5   | ADP-ribosylation-like factor 6 interacting protein 5                                      |            |            |            |           |         |       |       |           |       |       |       |
|                 | NM_006407 | 10550                                                                                     | -0.19      | -0.37      | 0.01       | -0.3      | 0.05    | 0     | 0.25  | 0.38      | 0.74  |       |       |
|                 | 0.26      | 0.41                                                                                      | 0.84       | 0.05       | 0          | 0.61      | 0.35    | -0.8  | -0.38 |           |       |       |       |
| IMAGp998M13236  | ARMCX1    | armadillo repeat containing, X-linked 1                                                   |            |            |            |           |         |       |       |           |       |       |       |
|                 | 51309     | -0.26                                                                                     | -0.03      | -0.06      | -0.29      | 0.46      | 0.29    | 0.74  | 0.28  | 0.6       | 0.46  | 0.81  |       |
|                 | 0.63      | 0.06                                                                                      | -0.32      | 0.51       | 0.59       | 0.2       | 0.43    |       |       |           |       |       |       |
| IMAGp998P151784 | ATP5G2    | ATP synthase, H+ transporting, mitochondrial F0 complex, subunit c (subunit 9), isoform 2 |            | NM_005176  | 517        | 0.46      | 0.13    | 0.48  |       |           |       |       |       |
|                 | 0.38      | 0.66                                                                                      | 0.9        | 0.15       | -0.06      | 0.13      | 0.02    | -0.13 | 0.22  | 0.22      | -0.03 | 1.12  |       |
|                 | 0.7       | 0                                                                                         | 0.28       |            |            |           |         |       |       |           |       |       |       |
| IMAGp998E04653  | BET1      | BET1 homolog (S. cerevisiae)                                                              |            |            |            |           |         |       |       | NM_005868 | 10282 | -0.23 |       |
|                 | 0.32      | 0.2                                                                                       | 0.17       | -0.36      | 0.09       | 0.63      | 0.59    | 0.68  | 0.83  | 0.35      | 0.71  | 0.01  | -     |
| 0.11            | 0.14      | 0.36                                                                                      | 0.3        | 1.08       |            |           |         |       |       |           |       |       |       |
| IMAGp998B111865 | C10orf33  | chromosome 10 open reading frame 33                                                       |            |            |            |           |         |       |       | NM_032709 |       |       |       |
|                 | 84795     | -0.15                                                                                     | 0.58       | -0.76      | -0.22      | -0.49     | 0.12    | 0.59  | 0.57  | 0.41      | 0.43  | 1.34  |       |
|                 | 0.57      | -0.09                                                                                     | -0.16      | -0.59      | 0.34       | -0.2      | -1.01   |       |       |           |       |       |       |

|                 |           |                                                         |       |       |       |       |       |       |       |       |       |       |       |           |
|-----------------|-----------|---------------------------------------------------------|-------|-------|-------|-------|-------|-------|-------|-------|-------|-------|-------|-----------|
| IMAGp998C02972  | C14orf102 | chromosome 14 open reading frame 102                    |       |       |       |       |       |       |       |       |       |       |       |           |
|                 | NM_017970 | 55051                                                   | -0.71 | 0.22  | -0.08 | -0.14 | 0.11  | -0.31 | -0.41 | -0.31 | -0.94 | -     |       |           |
| 0.48            | -0.93     | -0.47                                                   | -0.19 | -0.29 | 0.5   | 0.48  | 0.4   | 0.33  |       |       |       |       |       |           |
| IMAGp998H21470  | C14orf118 | Chromosome 14 open reading frame 118                    |       |       |       |       |       |       |       |       |       |       |       |           |
|                 | 55668     | 0.24                                                    | 0.13  | 0.66  | -0.01 | 0.56  | 0.38  | 0.15  | -0.02 | -0.16 | -0.21 | -0.29 | 0     |           |
|                 | -0.02     | 0.22                                                    | 0.81  | 0.38  | 1     | 1.57  |       |       |       |       |       |       |       |           |
| IMAGp998I04734  | C15orf12  | chromosome 15 open reading frame 12                     |       |       |       |       |       |       |       |       |       |       |       | NM_018285 |
|                 | 55272     | -1.05                                                   | 0.59  | -0.47 | 0     | 0     | 0.14  | -0.59 | -0.66 | -0.89 | -0.79 | -1.42 | -     |           |
| 0.75            | -0.26     | -0.09                                                   | -0.04 | -0.06 | 0.4   | -0.47 |       |       |       |       |       |       |       |           |
| IMAGp998A182010 | C20orf9   | chromosome 20 open reading frame 9                      |       |       |       |       |       |       |       |       |       |       |       | NM_016004 |
|                 | 51098     | 0.08                                                    | -0.18 | -0.18 | -0.04 | 0.06  | -0.45 | 0.54  | -0.11 | 0.6   | 0.1   | 0.28  |       |           |
|                 | 0.5       | 0.24                                                    | 0.04  | 0.24  | 0.13  | -0.6  | -2.54 |       |       |       |       |       |       |           |
| IMAGp998D23820  | C6orf80   | chromosome 6 open reading frame 80                      |       |       |       |       |       |       |       |       |       |       |       | 25901     |
|                 | 0.19      | 0.6                                                     | 0.54  | 0.6   | 1.56  | -0.3  | 0.87  | 0.85  | 0.99  | 0.69  | 0.95  | 0.75  |       |           |
|                 | 0.2       | 0.2                                                     | 0.3   | 0.18  | -0.4  | -0.05 |       |       |       |       |       |       |       |           |
| IMAGp998H11135  | C7orf23   | chromosome 7 open reading frame 23                      |       |       |       |       |       |       |       |       |       |       |       | 79161     |
|                 | 0.19      | -0.17                                                   | -0.09 | -0.14 | -0.46 | 0.1   | 0.3   | 0.51  | 0.21  | 0.25  | 0.86  | 0.19  | -0.13 | -         |
|                 | 0.14      | 0.32                                                    | 0.13  | 0.4   | -1.12 |       |       |       |       |       |       |       |       |           |
| IMAGp998N22623  | Cab45     | calcium binding protein Cab45 precursor                 |       |       |       |       |       |       |       |       |       |       |       | NM_016176 |
|                 | 51150     | -0.33                                                   | -0.06 | -0.26 | -0.73 | 0.09  | -0.61 | 0.16  | -0.03 | 0.92  | 0.42  | 1.19  |       |           |
|                 | 0.65      | 0.2                                                     | 0.49  | 0.07  | -0.63 | -0.4  | -0.45 |       |       |       |       |       |       |           |
| IMAGp998N04533  | CASK      | calcium/calmodulin-dependent serine protein kinase      |       |       |       |       |       |       |       |       |       |       |       |           |
| (MAGUK family)  | 8573      | -0.12                                                   | 1.63  | 0.65  | 0.11  | -0.1  | -0.34 | -0.48 | -0.23 | -     |       |       |       |           |
| 0.39            | -0.49     | -1.07                                                   | -0.36 | -0.48 | -0.01 | 0.44  | 0.3   | 1     | -0.25 |       |       |       |       |           |
| IMAGp998L2280   | CCL2      | chemokine (C-C motif) ligand 2                          |       |       |       |       |       |       |       |       |       |       |       | 6347      |
|                 | 0.23      | 0.33                                                    | 0     | 0.26  | 0.68  | 0.53  | 0.15  | 1.72  | 1.25  | 2.17  | 1.32  | -0.13 | 0.16  | -         |
|                 | 0.07      | -0.36                                                   | 0.5   | -0.21 |       |       |       |       |       |       |       |       |       |           |
| IMAGp998B16822  | CCNE1     | cyclin E1                                               |       |       |       |       |       |       |       |       |       |       |       |           |
|                 | 0.25      | -0.1                                                    | -0.03 | -0.06 | 0.31  | 0.42  | 0.16  | -0.42 | 0     | -0.48 | -0.39 | -2.3  | -     |           |
|                 | 1.1       |                                                         |       |       |       |       |       |       |       |       |       |       |       |           |
| IMAGp998C121895 | CCNE2     | cyclin E2                                               |       |       |       |       |       |       |       |       |       |       |       |           |
|                 | 9134      | -0.4                                                    | -0.76 | 0.05  | -0.69 | -     |       |       |       |       |       |       |       |           |
| 0.44            | -0.3      | 1.26                                                    | 0.72  | 0.77  | -0.23 | 0.5   | 0.1   | -0.36 | 1.06  | -0.79 | -1.38 | -0.8  | -     |           |
|                 | 1.68      |                                                         |       |       |       |       |       |       |       |       |       |       |       |           |
| IMAGp998D18199  | CDYL      | chromodomain protein, Y-like                            |       |       |       |       |       |       |       |       |       |       |       |           |
|                 | 9425      | -0.22                                                   | -     |       |       |       |       |       |       |       |       |       |       |           |
| 0.3             | -0.1      | -0.29                                                   | -0.35 | 0.29  | -0.03 | -0.29 | -0.4  | -0.58 | -0.81 | -0.42 | 0     | -0.29 |       |           |
|                 | 0.35      | 0.01                                                    | 0.2   | 1.24  |       |       |       |       |       |       |       |       |       |           |
| IMAGp998I22373  | CERK      | ceramide kinase                                         |       |       |       |       |       |       |       |       |       |       |       |           |
|                 | 64781     | 0.3                                                     | 0.04  | 0.22  |       |       |       |       |       |       |       |       |       |           |
|                 | 0.13      | 0.57                                                    | 0.14  | -0.1  | -0.51 | -0.29 | -0.55 | -0.72 | -0.35 | -0.02 | 0.19  | 0.07  | -     |           |
| 0.07            | -0.7      | -0.29                                                   |       |       |       |       |       |       |       |       |       |       |       |           |
| IMAGp998B021861 | CHAF1B    | chromatin assembly factor 1, subunit B (p60)            |       |       |       |       |       |       |       |       |       |       |       |           |
|                 | 8208      | -0.2                                                    | 0.22  | -0.59 | -0.25 | -0.18 | -0.45 | 0.05  | 0.63  | 0.1   | 0.15  | 0.27  |       |           |
|                 | 0.29      | -0.65                                                   | 0.23  | -0.71 | -0.53 | -0.7  | -0.82 |       |       |       |       |       |       |           |
| IMAGp998M07224  | CHD9      | chromodomain helicase DNA binding protein 9             |       |       |       |       |       |       |       |       |       |       |       |           |
|                 | 80205     | 0.38                                                    | 0.35  | 0.83  | 0.52  | 1.1   | 1.02  | 0.09  | -0.22 | -0.1  | -     |       |       |           |
| 0.11            | -0.15     | -0.29                                                   | 0.29  | 0.02  | 1.44  | 1.13  | 1     | 1.44  |       |       |       |       |       |           |
| IMAGp998L071853 | CHIC2     | cysteine-rich hydrophobic domain 2                      |       |       |       |       |       |       |       |       |       |       |       |           |
|                 | 26511     |                                                         |       |       |       |       |       |       |       |       |       |       |       |           |
|                 | 0.17      | 0.28                                                    | 0.89  | 0.35  | 1.1   | 0.22  | 0.09  | -0.26 | 0.15  | -0.49 | 0.13  | -0.72 |       |           |
|                 | 1.63      | 0.3                                                     | 0.4   | 0.06  | 0.2   | 1.01  |       |       |       |       |       |       |       |           |
| IMAGp998G01671  | CHST2     | carbohydrate (N-acetylglucosamine-6-O) sulfotransferase |       |       |       |       |       |       |       |       |       |       |       |           |
|                 | 2         | 9435                                                    | -0.34 | 0     | -0.85 | -0.08 | -0.21 | 0.06  | -0.84 | -0.63 | -1.67 | -1.71 | -     |           |
| 2.08            | -0.78     | -0.18                                                   | -0.26 | -0.33 | 0.01  | 0.2   | -0.11 |       |       |       |       |       |       |           |
| IMAGp998J14406  | CHST2     | carbohydrate (N-acetylglucosamine-6-O) sulfotransferase |       |       |       |       |       |       |       |       |       |       |       |           |
|                 | 2         | 9435                                                    | -0.52 | 0.13  | -0.96 | 0.21  | -0.16 | -0.07 | -0.74 | -0.57 | -1.56 | -1.44 | -     |           |
| 0.94            | -1.07     | -0.11                                                   | -0.15 | -0.21 | -0.15 | 0.1   | 0.22  |       |       |       |       |       |       |           |
| IMAGp998O181782 | CHST5     | carbohydrate (N-acetylglucosamine 6-O) sulfotransferase |       |       |       |       |       |       |       |       |       |       |       |           |
|                 | 5         | 23563                                                   | -0.28 | -0.14 | -0.36 | 0.01  | -0.6  | 0.07  | 0.13  | 0.1   | 0.41  | 0.1   |       |           |
|                 | 0.5       | 0.33                                                    | -0.29 | -0.47 | -0.21 | 0.22  | 0.6   | -0.38 |       |       |       |       |       |           |

|                 |               |                                                                    |           |        |       |       |       |       |       |       |       |       |       |
|-----------------|---------------|--------------------------------------------------------------------|-----------|--------|-------|-------|-------|-------|-------|-------|-------|-------|-------|
| IMAGp998C161862 | CLDN11        | claudin 11 (oligodendrocyte transmembrane protein)                 |           |        |       |       |       |       |       |       |       |       |       |
| NM_005602       | 5010          |                                                                    | -0.16     | -0.12  | -0.67 | -0.53 | -0.99 | -0.61 | 0.38  | 0.42  | 0.19  |       |       |
|                 | 0.37          | 0.81                                                               | 0.68      | -0.23  | -0.22 | -0.38 | 0.02  | -0.1  | -1.4  |       |       |       |       |
| IMAGp998K211869 | CLDN12        | claudin 12                                                         | NM_012129 | 9069   |       |       |       |       |       |       |       |       |       |
| 0.05            | 0.2           | 0.33                                                               | -0.09     | 0.05   | -0.25 | -0.24 | -0.26 | 0.08  | 0.04  | -0.22 | 1.15  | 1.08  |       |
|                 | 1.1           | 1.62                                                               |           |        |       |       |       |       |       |       |       |       |       |
| IMAGp998L031159 | COL5A2        | collagen, type V, alpha 2                                          | NM_000393 | 1290   |       |       |       |       |       |       |       |       |       |
| 0.42            | 0.25          | -0.17                                                              | 0.04      | 0.17   | -0.25 | 0.35  | 0.34  | 0.44  | 0.38  | 0.65  | 0.76  | -0.39 |       |
|                 | 0.06          | 0.37                                                               | 0.44      | 0.1    | 0.03  |       |       |       |       |       |       |       |       |
| IMAGp998O06236  | COLM          | collomin                                                           | NM_181789 | 342035 |       |       |       |       |       |       |       |       |       |
|                 | 0.14          | -0.12                                                              | -0.29     | 0.27   | 0.34  | 0.32  | -0.07 | 0.12  | 0.07  | 0.01  | -0.31 | 0.04  |       |
| 0.39            | -0.4          | -0.38                                                              |           |        |       |       |       |       |       |       |       |       |       |
| IMAGp998B05209  | COQ6          | coenzyme Q6 homolog (yeast)                                        | NM_182480 | 51004  |       |       |       |       |       |       |       |       |       |
| 0.07            | -0.35         | 0.14                                                               | 0.05      | 0.42   | 0.19  | 0.11  | 0.41  | 0.25  | 0.58  | 0.33  | -0.16 | 0.07  |       |
|                 | 0.04          | 0.06                                                               | -1.6      | -1.14  |       |       |       |       |       |       |       |       |       |
| IMAGp998I03669  | CRI2          | CREBBP/EP300 inhibitor 2                                           |           | 163126 |       |       |       |       |       |       |       |       |       |
| 0.61            | -0.57         | -0.72                                                              | -0.54     | -0.24  | -0.1  | -0.11 | 0.3   | 0.16  | 0.23  | 0.47  | 0.12  | -0.24 |       |
|                 | 0.11          | -0.01                                                              | 0         | -0.24  |       |       |       |       |       |       |       |       |       |
| IMAGp998A22374  | CRLF3         | cytokine receptor-like factor 3                                    |           | 51379  |       |       |       |       |       |       |       |       |       |
|                 | 0.19          | 0.24                                                               | 0.56      | 0.64   | 0.48  | -0.13 | 0.02  | -0.01 | -0.05 | -0.47 | -0.29 | 0.02  |       |
| 0.03            | 1.5           | -0.21                                                              | 0.1       | 0.35   |       |       |       |       |       |       |       |       |       |
| IMAGp998C04733  | CSRP2         | cysteine and glycine-rich protein 2                                |           | 1466   |       |       |       |       |       |       |       |       |       |
|                 | 0.08          | -0.69                                                              | -0.13     | -0.51  | -0.29 | 0     | -0.05 | 0.19  | 0.19  | -0.03 | 0.34  | -0.18 |       |
| 0.18            | -0.7          | -0.52                                                              | -0.1      | -0.33  |       |       |       |       |       |       |       |       |       |
| IMAGp998F23839  | CYB5          | cytochrome b-5                                                     |           | 1528   |       |       |       |       |       |       |       |       |       |
|                 | 0.45          | -0.14                                                              | 0.67      | -0.02  | 0.64  | 0.28  | 0.7   | 0.42  | 0.11  | -0.04 | 0.2   | -0.42 | 0     |
|                 | 0.02          |                                                                    |           |        |       |       |       |       |       |       |       |       |       |
| IMAGp998D06191  | DAAM1         | dishevelled associated activator of morphogenesis 1                |           |        |       |       |       |       |       |       |       |       |       |
|                 | 23002         | -0.28                                                              | 0.85      | 0.1    | 0.49  | 0.54  | 0.31  | -0.22 | -0.3  | -0.07 | 0.09  | -0.1  |       |
| 0.14            | 0.89          | 0.31                                                               | 0.04      | -0.1   | 0.1   | 0.74  |       |       |       |       |       |       |       |
| IMAGp998K22829  | DDIT4         | DNA-damage-inducible transcript 4                                  | NM_019058 | 54541  |       |       |       |       |       |       |       |       |       |
| 1.43            | -0.26         | -1.53                                                              | -0.74     | -1.93  | -2.09 | -0.24 | 0.26  | 0.38  | 0.71  | 1.41  | 1.05  | 1.86  |       |
|                 | 0.41          | -0.26                                                              | 0.28      | -1.4   | 0.11  |       |       |       |       |       |       |       |       |
| IMAGp998P161747 | DDX21         | DEAD (Asp-Glu-Ala-Asp) box polypeptide 21                          | NM_004728 |        |       |       |       |       |       |       |       |       |       |
|                 | 9188          | -0.12                                                              | -0.87     | 0.23   | -0.89 | 0.79  | 0.15  | -0.53 | -1.2  | -1.88 | -0.99 | -1.93 |       |
| 1.6             | 0.39          | -0.1                                                               | 0.92      | 0.37   | 0.1   | 0.29  |       |       |       |       |       |       |       |
| IMAGp998D106103 | DDX21         | DEAD (Asp-Glu-Ala-Asp) box polypeptide 21                          | NM_004728 |        |       |       |       |       |       |       |       |       |       |
|                 | 9188          | -0.9                                                               | -0.17     | -0.74  | -0.37 | 2.33  | -0.63 | -0.67 | -1.26 | -1.89 | -0.06 | -1.83 |       |
| 1.63            | 0.46          | 0.02                                                               | 0.77      | 0.21   | 0.2   | -0.11 |       |       |       |       |       |       |       |
| IMAGp998C15391  | DDX5          | Homo sapiens DEAD (Asp-Glu-Ala-Asp) box polypeptide 5 (DDX5), mRNA | NM_004396 | 1655   |       |       |       |       |       |       |       |       |       |
|                 | 0.34          | -0.67                                                              | -0.87     | -0.82  | -0.52 | 0.18  | -0.13 | 1.03  | 0.88  | 0     | 0.47  |       |       |
| IMAGp998C11192  | DKFZp434C0328 | hypothetical protein DKFZp434C0328                                 |           |        |       |       |       |       |       |       |       |       |       |
|                 | NM_017577     | 54762                                                              | 0.1       | -0.09  | 0.26  | 0.36  | 0.9   | 0.88  | -0.07 | -0.27 | -0.29 |       |       |
| 0.35            | 0.24          | -0.47                                                              | -0.14     | -0.13  | 0.17  | 0.04  | 1.4   | 0.39  |       |       |       |       |       |
| IMAGp998I17617  | DKFZP434F0318 | hypothetical protein DKFZP434F0318                                 |           |        |       |       |       |       |       |       |       |       |       |
|                 | NM_030817     | 81575                                                              | -0.31     | 0.17   | -1.2  | -0.39 | -1.07 | -0.91 | 0.63  | 0.56  | 0.17  |       |       |
|                 | 0.55          | 0.6                                                                | 0.34      | -0.09  | -0.62 | 0.14  | 0.29  | 0.6   | -0.48 |       |       |       |       |
| IMAGp998B20616  | DKFZP564G2022 | DKFZP564G2022 protein                                              | NM_015497 | 25963  |       |       |       |       |       |       |       |       |       |
|                 | 0.38          | -0.58                                                              | 0.1       | 0      | 0.27  | -0.35 | -0.11 | -0.33 | -0.79 | -0.59 | 0.04  | -0.42 |       |
|                 | 0.2           | -0.06                                                              | 0.9       | 0.69   | 0.7   | 0.8   |       |       |       |       |       |       |       |
| IMAGp998J01134  | DLG5          | discs, large homolog 5 (Drosophila)                                | NM_004747 | 9231   |       |       |       |       |       |       |       |       |       |
|                 | 0.3           | 0.78                                                               | -0.14     | 0.11   | 0.01  | 0.25  | -0.12 | -0.22 | -0.24 | -0.28 | -0.75 | -0.25 | -0.09 |
| 0.15            | 0.62          | 0.37                                                               | 0.6       | 0      |       |       |       |       |       |       |       |       |       |
| IMAGp998D061924 | DNCL2B        | dynein, cytoplasmic, light polypeptide 2B                          |           |        |       |       |       |       |       |       |       |       |       |
|                 | NM_130897     | 83657                                                              | -0.41     | 0.36   | -0.12 | 0.23  | -0.3  | 0.87  | -0.52 | -0.24 | -0.31 |       |       |
| 0.26            | -0.63         | -0.46                                                              | 0.16      | -0.13  | 0.01  | 0.5   | 0     | -0.47 |       |       |       |       |       |

|                 |          |                                                               |           |        |       |       |       |       |       |       |       |       |       |   |
|-----------------|----------|---------------------------------------------------------------|-----------|--------|-------|-------|-------|-------|-------|-------|-------|-------|-------|---|
| IMAGp998C03128  | DTL      | denticleless homolog (Drosophila)                             | NM_016448 | 51514  | -     |       |       |       |       |       |       |       |       |   |
| 0.89            | 0.3      | -0.95                                                         | -0.36     | -0.68  | -0.54 | 0.53  | 0.55  | 0.18  | 0.27  | 0.39  | 0.7   | -0.35 | 0     |   |
|                 |          | -0.22                                                         | -0.77     | -0.6   | -0.39 |       |       |       |       |       |       |       |       |   |
| IMAGp998N0278   | EBF2     | early B-cell factor 2                                         | 64641     | -0.17  | 0.12  | -0.18 | -     |       |       |       |       |       |       |   |
| 0.03            | 0.16     | 0.19                                                          | -0.21     | -0.22  | -0.45 | -0.23 | -0.24 | -0.7  | -0.05 | -0.34 | 0.39  | 0.07  | 1     |   |
|                 |          | -0.18                                                         |           |        |       |       |       |       |       |       |       |       |       |   |
| IMAGp998G04178  | ECEL1    | endothelin converting enzyme-like 1                           | 9427      | 0.07   | -     |       |       |       |       |       |       |       |       |   |
| 0.47            | -0.18    | 0.09                                                          | -0.93     | -1.1   | 0.26  | 0.15  | 0.17  | 0.35  | 0.37  | 0.27  | -0.29 | -0.01 | -     |   |
|                 |          | 0.12                                                          | 0.09      | -1.3   | 0.58  |       |       |       |       |       |       |       |       |   |
| IMAGp998B215843 | ERN1     | endoplasmic reticulum to nucleus signalling 1                 |           |        |       |       |       |       |       |       |       |       |       |   |
|                 |          | 2081                                                          | -0.23     | 0.38   | -0.16 | 0.57  | 0.38  | 0.12  | -0.26 | -0.9  | -0.4  | -0.65 | -1.35 | - |
|                 |          | 0.55                                                          | -0.03     | 0.24   | -0.23 | -0.59 | -0.5  | 0.47  |       |       |       |       |       |   |
| IMAGp998B22525  | EZH2     | enhancer of zeste homolog 2 (Drosophila)                      | NM_152998 |        |       |       |       |       |       |       |       |       |       |   |
|                 |          | 2146                                                          | -0.91     | 0.11   | -0.98 | -0.36 | -0.71 | -1.04 | -0.02 | 0.15  | 0.22  | 0.21  | 0.1   | - |
|                 |          | 0.2                                                           | -0.18     | -0.01  | -0.02 | 0.07  | -1.1  | -0.31 |       |       |       |       |       |   |
| IMAGp998C141794 | FBXO4    | F-box protein 4                                               | NM_012176 | 26272  | -0.26 | 0.31  | -0.17 | -     |       |       |       |       |       |   |
|                 |          | 0.14                                                          | 0.19      | -0.3   | 0.3   | 0.01  | 0.13  | 0.29  | 0.58  | 0.33  | -0.23 | -0.53 | -0.33 | - |
|                 |          | 0.1                                                           | -0.1      | 0.06   |       |       |       |       |       |       |       |       |       |   |
| IMAGp998G16882  | FEM1A    | fem-1 homolog a (C.elegans)                                   | 55527     | -0.15  | 0.23  | -     |       |       |       |       |       |       |       |   |
| 0.24            | 0.17     | 0.07                                                          | 0.23      | -0.43  | -0.3  | -0.28 | -0.33 | -0.97 | -0.42 | -0.15 | -0.05 | 0.13  |       |   |
|                 |          | 0.23                                                          | 0.9       | 0.44   |       |       |       |       |       |       |       |       |       |   |
| IMAGp998C09565  | FES      | feline sarcoma oncogene                                       | NM_002005 | 2242   | 0.05  | -0.38 | -     |       |       |       |       |       |       |   |
|                 |          | 0.15                                                          | -0.43     | 0.23   | 0.01  | -0.07 | -0.21 | -0.63 | -0.49 | -0.24 | -0.62 | -0.24 | 0.23  |   |
|                 |          | 0.34                                                          | 0.2       | 0      | 0.21  |       |       |       |       |       |       |       |       |   |
| IMAGp998C091203 | FLJ13639 | hypothetical protein FLJ13639                                 | 79758     | 0.3    | -     |       |       |       |       |       |       |       |       |   |
| 0.71            | 0.73     | 0.04                                                          | 0.99      | 1.27   | -0.18 | -0.41 | -0.76 | -0.5  | -1.08 | -0.42 | -0.19 | 0.28  |       |   |
|                 |          | 0.26                                                          | -0.19     | 0.2    | -0.03 |       |       |       |       |       |       |       |       |   |
| IMAGp998G05794  | FLJ20323 | hypothetical protein FLJ20323                                 | NM_019005 | 54468  | -     |       |       |       |       |       |       |       |       |   |
| 0.75            | -0.14    | -0.53                                                         | -0.19     | -0.06  | -0.12 | -0.62 | -0.33 | -0.66 | -0.45 | -0.69 | -0.54 | -0.02 | -     |   |
|                 |          | 0.34                                                          | 0.7       | 0.62   | 1.2   | 0.17  |       |       |       |       |       |       |       |   |
| IMAGp998B083711 | FLJ25715 | hypothetical protein FLJ25715                                 | 284241    |        | -     |       |       |       |       |       |       |       |       |   |
| 0.01            | -0.09    | -0.15                                                         | -0.11     | -0.24  | -1.16 | 0.49  | -0.06 | 0.34  | 0.22  | 1.12  | 0.88  | -0.09 | -     |   |
|                 |          | 0.3                                                           | -0.16     | 0.24   | -0.4  | -1.01 |       |       |       |       |       |       |       |   |
| IMAGp998E191785 | FLJ32658 | hypothetical protein FLJ32658                                 | NM_144688 | 147872 |       |       |       |       |       |       |       |       |       |   |
|                 |          | -0.42                                                         | 0.16      | -0.6   | -0.31 | -0.72 | -0.38 | 0.06  | 0.2   | 0.33  | 0.33  | 0.47  | 0.25  |   |
|                 |          | 0.27                                                          | -0.5      | -0.08  | 0.24  | 0.3   | 0.09  |       |       |       |       |       |       |   |
| IMAGp998K06189  | FLJ33167 | hypothetical protein FLJ33167                                 | 201973    |        | -     |       |       |       |       |       |       |       |       |   |
| 0.28            | 0.14     | -0.46                                                         | -0.57     | -0.26  | -0.24 | 0.6   | 0.67  | 0.7   | 0.29  | 1.09  | 0.61  | -0.15 |       |   |
|                 |          | 0.26                                                          | -0.29     | -0.35  | -0.9  | -0.49 |       |       |       |       |       |       |       |   |
| IMAGp998G034013 | GBAS     | glioblastoma amplified sequence                               | NM_001483 | 2631   | -     |       |       |       |       |       |       |       |       |   |
| 0.32            | -0.38    | -0.17                                                         | -0.3      | -0.27  | -0.13 | 0.33  | 0.4   | 0.36  | 0.41  | 0.94  | 0.99  | 0.03  | -     |   |
|                 |          | 0.03                                                          | 0.18      | 0.28   | 0     | 0.7   |       |       |       |       |       |       |       |   |
| IMAGp998P201724 | GCN1L1   | GCN1 general control of amino-acid synthesis 1-like 1 (yeast) | NM_006836 | 10985  | -0.06 | 0.04  | -0.22 | 0.08  | 0.16  | 0.34  | -0.36 | -     |       |   |
|                 |          | 0.04                                                          | -0.53     | -0.18  | -0.99 | -0.21 | -0.17 | -0.04 | 0.15  | 0.17  | -0.2  | 0.14  |       |   |
| IMAGp998C21593  | HDAC9    | Histone deacetylase 9                                         | 9734      | 0.08   | 0.84  | 0.32  |       |       |       |       |       |       |       |   |
|                 |          | 0.99                                                          | 0.59      | 0.85   | -0.24 | 0.08  | -0.36 | -0.1  | 0.11  | -0.25 | -0.27 | -0.02 | -0.03 |   |
|                 |          | 0.15                                                          | 1         | 0.42   |       |       |       |       |       |       |       |       |       |   |
| IMAGp998F082039 | HOP      | homeodomain-only protein                                      | 84525     | -0.64  | 0     | -     |       |       |       |       |       |       |       |   |
| 0.55            | 0.1      | 0.02                                                          | -1.14     | 0.43   | 0.39  | 0.45  | 0.29  | 0.21  | 0.12  | -0.27 | -0.2  | -0.05 | -     |   |
|                 |          | 0.05                                                          | 0.5       | -0.38  |       |       |       |       |       |       |       |       |       |   |
| IMAGp998N181196 | HOXA9    | homeo box A9                                                  | NM_002142 | 3205   | -0.3  | 0.09  | -0.47 | -     |       |       |       |       |       |   |
| 0.44            | 0.01     | -0.41                                                         | 0.3       | 0.07   | 0.21  | 0.4   | -0.01 | 0.8   | -0.21 | -0.41 | -0.04 | -0.11 | 0     |   |
|                 |          | -1.57                                                         |           |        |       |       |       |       |       |       |       |       |       |   |
| IMAGp998F06112  | HTATIP2  | HIV-1 Tat interactive protein 2, 30kDa                        |           |        |       |       |       |       |       |       |       |       |       |   |
|                 |          | 10553                                                         | 0.12      | -0.33  | -0.1  | -0.14 | 0.02  | 0.01  | 0.24  | 0.12  | 0.32  | 0.24  | 0.64  |   |
|                 |          | 0.21                                                          | -0.17     | -0.06  | -0.34 | -0.08 | -1.7  | -0.3  |       |       |       |       |       |   |

|                 |           |                                                                                  |              |        |       |       |       |       |       |       |       |       |       |       |       |       |       |       |       |       |      |
|-----------------|-----------|----------------------------------------------------------------------------------|--------------|--------|-------|-------|-------|-------|-------|-------|-------|-------|-------|-------|-------|-------|-------|-------|-------|-------|------|
| IMAGp998N08406  | ID1       | inhibitor of DNA binding 1, dominant negative helix-loop-helix protein           | 3397         | 0.1    | 0.09  | 0.38  | 0.12  | 0.58  | 1.02  | -1.17 | -     |       |       |       |       |       |       |       |       |       |      |
|                 |           |                                                                                  | 1.62         | -1.25  | -1.28 | -2.03 | -1.56 | 0.1   | 0.05  | 0.52  | 0.05  | -0.1  | 0.65  |       |       |       |       |       |       |       |      |
| IMAGp998J061962 | IDI1      | isopentenyl-diphosphate delta isomerase                                          | NM_004508    | 3422   | -0.45 | -0.1  | -0.63 | -0.44 | -0.6  | -0.35 | 0.18  | 0.32  | 0.04  | 0.23  | 0.78  |       |       |       |       |       |      |
|                 |           |                                                                                  |              | 0.33   | 0.21  | -0.3  | 0.1   | 0.26  | -0.1  | -0.23 |       |       |       |       |       |       |       |       |       |       |      |
| IMAGp998L08626  | IGF1R     | insulin-like growth factor 1 receptor                                            | 3480         | 0.31   | -0.1  | -0.03 | 0.23  | 0.11  | 0.53  | -0.35 | -0.21 | -1.63 | -0.54 | -1.34 | -0.71 | -0.38 |       |       |       |       |      |
|                 |           |                                                                                  |              | 0.23   | 0.16  | 0.22  | 0     | 0.44  |       |       |       |       |       |       |       |       |       |       |       |       |      |
| IMAGp998K153905 | IRX2      | iroquois homeobox protein 2                                                      | NM_033267    | 153572 | 0.29  | -0.33 | 0.14  | -0.02 | 0.5   | -0.69 | -0.43 | -0.57 | -0.56 | -0.81 | -1.58 | -0.21 |       |       |       |       |      |
|                 |           |                                                                                  |              | 0.34   | 0.42  | 0.11  | 0.11  | 1     | 1.06  |       |       |       |       |       |       |       |       |       |       |       |      |
| IMAGp998C101962 | ISL2      | ISL2 transcription factor, LIM/homeodomain, (islet-2)                            | NM_145805    | 64843  | -0.11 | -0.07 | -0.35 | 0.13  | -0.32 | 0.12  | 0.14  | 0.35  | 0.15  |       |       |       |       |       |       |       |      |
|                 |           |                                                                                  |              | 0.49   | 0.11  | 0.11  | 0.11  | -0.31 | -0.13 | 0.01  | -2.1  | -0.55 |       |       |       |       |       |       |       |       |      |
| IMAGp998F06678  | JDP2      | jun dimerization protein 2                                                       | 122953       | 0.19   | -0.69 | -0.28 | -0.13 | -1.36 | 0.07  | -0.13 | -0.06 | 0.27  | 0.45  | 0.63  | -0.23 | -0.34 |       |       |       |       |      |
|                 |           |                                                                                  |              | 0.59   | 0     | -1.7  | -0.3  |       |       |       |       |       |       |       |       |       |       |       |       |       |      |
| IMAGp998P0786   | JMJD2C    | jumonji domain containing 2C                                                     | 23081        | 0.36   | 0.19  | 0.31  | 0.58  | 0.9   | -1.19 | -0.03 | 0.08  | -0.18 | -0.01 | 0.07  | -0.03 |       |       |       |       |       |      |
|                 |           |                                                                                  |              | 0.07   | 0.33  | 0.37  | 0.7   | 0.31  |       |       |       |       |       |       |       |       |       |       |       |       |      |
| IMAGp998N202011 | KBTBD6    | kelch repeat and BTB (POZ) domain containing 6                                   | NM_152903    | 89890  | -0.3  | -0.37 | -0.18 | -0.46 | -0.15 | -0.32 | 0.32  | 0.17  | 0.94  |       |       |       |       |       |       |       |      |
|                 |           |                                                                                  |              | 0.4    | 0.49  | 0.99  | 0.01  | 0.13  | 0.19  | 0.02  | -0.4  | 0.99  |       |       |       |       |       |       |       |       |      |
| IMAGp998A041725 | KCNMB3    | potassium large conductance calcium-activated channel, subfamily M beta member 3 | NM_171830    | 27094  | -0.03 | 0     | -0.14 | -0.08 |       |       |       |       |       |       |       |       |       |       |       |       |      |
|                 |           |                                                                                  |              | 0.16   | 0.06  | 0.17  | 0.29  | 0.23  | 0.31  | 0.1   | -0.05 | -0.18 | -0.11 | 0     | -0.51 | 0     |       |       |       |       |      |
|                 |           |                                                                                  |              | -0.3   |       |       |       |       |       |       |       |       |       |       |       |       |       |       |       |       |      |
| IMAGp998B13204  | KIAA1423  | KIAA1423                                                                         | XM_376550    | 57583  | -0.5  | 0.06  | -0.39 | -     | 0.1   | 0.06  | 0.1   | -0.3  | -0.18 | -0.74 | -0.78 | -0.77 | -0.46 | -0.16 | -0.23 | 0.93  | 0.88 |
|                 |           |                                                                                  |              | 0.9    | -0.17 |       |       |       |       |       |       |       |       |       |       |       |       |       |       |       |      |
| IMAGp998E23314  | KIAA1718  | KIAA1718 protein                                                                 | XM_376680    | 80853  | -0.12 | 0.84  |       |       | 0.26  | 0.45  | 1.49  | 0.21  | -0.3  | -0.36 | -0.26 | -0.09 | -1    | -0.62 | -0.33 | -0.09 |      |
|                 |           |                                                                                  |              | 0.01   | -0.16 | -0.3  | 0.55  |       |       |       |       |       |       |       |       |       |       |       |       |       |      |
| IMAGp998I141163 | KLF6      | Kruppel-like factor 6                                                            | 1316         | 0.39   | 1.1   | 0.84  | -0.07 | -0.65 | -1.44 | -1.78 | -1.94 | -1.16 | 0.07  | 0.06  | 1.02  |       |       |       |       |       |      |
|                 |           |                                                                                  |              | 0.9    | 0.4   | 0.79  |       |       |       |       |       |       |       |       |       |       |       |       |       |       |      |
| IMAGp998F173980 | LOC150271 | Hypothetical protein LOC150271                                                   | 150271       | -0.25  | 0.07  | -0.1  | -1.61 | -0.86 | -0.28 | 0.22  | 0.19  | 0.06  | 0.28  | -0.11 | -0.01 | -     |       |       |       |       |      |
|                 |           |                                                                                  |              | 0.09   | -0.18 | -0.04 | 0.23  | -0.1  | -0.58 |       |       |       |       |       |       |       |       |       |       |       |      |
| IMAGp998M062035 | LOC162073 | Hypothetical protein LOC162073                                                   | 162073       | 0.41   | -0.24 | 0.43  | -0.06 | -0.21 | 0.66  | 0.27  | -0.16 | -1.18 | -1.61 | -1.04 | -0.93 |       |       |       |       |       |      |
|                 |           |                                                                                  |              | 0.04   | 0.04  | 0.84  | 0.59  | 0     | 0.23  |       |       |       |       |       |       |       |       |       |       |       |      |
| IMAGp998C24181  | LOC284018 | hypothetical protein LOC284018                                                   | NM_181655    | 284018 | -0.33 | 0.3   | -0.25 | -0.05 | 0.12  | -1.28 | 0.14  | 0.32  | 0.2   | 0.05  |       |       |       |       |       |       |      |
|                 |           |                                                                                  |              | 0.81   | 0.34  | -0.17 | 0.1   | -0.3  | -0.55 | -0.7  | 0.21  |       |       |       |       |       |       |       |       |       |      |
| IMAGp998G134031 | LOC284422 | similar to HSPC323                                                               | XM_209196    | 284422 | -0.1  | 0.28  | -0.15 | 0.26  | 0.38  | 0.51  | 0.41  | 0.74  | 1     | 0.12  | -     |       |       |       |       |       |      |
|                 |           |                                                                                  |              | 0.49   | 0.06  | -0.5  | -0.2  | 0.14  |       |       |       |       |       |       |       |       |       |       |       |       |      |
| IMAGp998O181199 | LOC388796 | hypothetical LOC388796                                                           | XM_373914    | 388796 | -0.37 | -0.87 | -0.37 | -0.11 | -0.02 | -0.73 | -0.42 | -0.71 | -0.77 | -1.05 | -1.14 | -0.23 | -     |       |       |       |      |
|                 |           |                                                                                  |              | 0.24   | 0.02  | 0.26  | 0.7   | -0.68 |       |       |       |       |       |       |       |       |       |       |       |       |      |
| IMAGp998E201119 | LOC388969 | hypothetical LOC388969                                                           | NM_001013649 | 388969 | 0.09  | -0.28 | -0.32 | 0.3   | -0.02 | -0.14 | 0.07  | 0.5   | 1.11  | 0.33  | 0.06  | 0.49  |       |       |       |       |      |
|                 |           |                                                                                  |              | 0.19   | -0.03 | 0.4   | 0.21  | -2.6  | -0.58 |       |       |       |       |       |       |       |       |       |       |       |      |





|                 |          |                                                                                              |              |       |       |       |       |       |       |       |       |       |       |   |
|-----------------|----------|----------------------------------------------------------------------------------------------|--------------|-------|-------|-------|-------|-------|-------|-------|-------|-------|-------|---|
| IMAGp998L154547 | PADI3    | peptidyl arginine deiminase, type III                                                        | NM_016233    |       |       |       |       |       |       |       |       |       |       |   |
|                 | 51702    | -0.33                                                                                        | 0.16         | -0.27 | 0.72  | -0.41 | -1.06 | 0.47  | 0.2   | 0.44  | 0.37  | 0.2   |       |   |
|                 |          | 0.64                                                                                         | -0.02        | 0.27  | 0.2   | -0.66 | -1.7  | -0.06 |       |       |       |       |       |   |
| IMAGp998L19593  | PAFAH1B2 | platelet-activating factor acetylhydrolase, isoform Ib, beta subunit                         | 30kDa        | 5049  | 0.22  | 0.22  | 0.34  | 0.26  | 0.69  |       |       |       |       |   |
|                 |          | 0.79                                                                                         | 0.25         | 0.16  | -0.94 | -0.53 | -0.97 | -0.84 | 0.18  | 3.32  | 1.05  | 0.82  | 0.7   |   |
|                 |          | 0.53                                                                                         |              |       |       |       |       |       |       |       |       |       |       |   |
| IMAGp998O0818   | PDIR     | protein disulfide isomerase-associated 5                                                     |              | 10954 | -     |       |       |       |       |       |       |       |       |   |
|                 | 0.9      | -0.16                                                                                        | -1.14        | -0.17 | 0.15  | -0.46 | -0.2  | 0.34  | -0.22 | -0.02 | 0.25  | -0.02 | -0.41 | - |
|                 | 0.24     | -0.33                                                                                        | 0.06         | -1    | -1.76 |       |       |       |       |       |       |       |       |   |
| IMAGp998G011199 | PDLIM5   | PDZ and LIM domain 5                                                                         | NM_006457    | 10611 | 0.57  | -     |       |       |       |       |       |       |       |   |
|                 | 0.28     | 0.9                                                                                          | 0.05         | 0.7   | 1.09  | -0.13 | -0.55 | -0.71 | -0.48 | -0.66 | -0.36 | -0.09 | 0.37  |   |
|                 |          | 0.52                                                                                         | -0.01        | -0.2  | 0.18  |       |       |       |       |       |       |       |       |   |
| IMAGp998P08679  | PFDN2    | prefoldin 2                                                                                  |              | 5202  | -0.23 | -0.49 | -0.28 | -0.22 | 0.37  |       |       |       |       |   |
|                 | 0.28     | -0.19                                                                                        | -0.24        | -0.82 | -0.74 | -0.88 | -0.7  | 0.14  | -0.03 | 1.12  | 0.87  | 0     | -     |   |
|                 | 0.21     |                                                                                              |              |       |       |       |       |       |       |       |       |       |       |   |
| IMAGp998F21398  | Pfs2     | DNA replication complex GINS protein                                                         | PSF2         | 51659 | -     |       |       |       |       |       |       |       |       |   |
|                 | 0.83     | 0.41                                                                                         | -1.11        | -0.25 | -0.62 | -1.34 | 0.14  | 0.51  | 0.34  | 0.44  | 0.99  | -0.16 | -0.3  | 0 |
|                 |          | -0.43                                                                                        | -0.09        | -0.7  | -0.27 |       |       |       |       |       |       |       |       |   |
| IMAGp998J17653  | PHYH     | phytanoyl-CoA hydroxylase (Refsum disease)                                                   |              |       |       |       |       |       |       |       |       |       |       |   |
|                 | 5264     | -0.3                                                                                         | 0.01         | -0.13 | 0.34  | 0.14  | 0.52  | 0.74  | 0.57  | 0.33  | 0.53  | 0.61  |       |   |
|                 |          | 0.91                                                                                         | -0.17        | 0.13  | 0.17  | 0.48  | 0.2   | 0.29  |       |       |       |       |       |   |
| IMAGp998I064413 | PKD1     | polycystic kidney disease 1 (autosomal dominant)                                             |              |       |       |       |       |       |       |       |       |       |       |   |
|                 | 5310     | -0.46                                                                                        | 0.29         | 0.02  | 0.44  | 0.7   | 1.32  | 0.56  | 0.9   | 0.42  | 0.76  | 0.66  |       |   |
|                 |          | 0.53                                                                                         | -0.06        | 0     | -0.3  | -0.1  | 0     | -0.89 |       |       |       |       |       |   |
| IMAGp998C144000 | PKHD1    | polycystic kidney and hepatic disease 1 (autosomal recessive)                                |              |       |       |       |       |       |       |       |       |       |       |   |
|                 | 5314     | -0.04                                                                                        | -0.2         | -0.25 | -0.18 | -2.04 | 0.01  | 0.39  | -0.02 | 0.51  |       |       |       |   |
|                 | 0.36     | 0.1                                                                                          | -0.2         | -0.14 | 0.05  | -0.06 | -0.46 | -0.2  | -0.65 |       |       |       |       |   |
| IMAGp998E01326  | PKM2     | pyruvate kinase, muscle                                                                      | NM_182471    | 5315  | -0.78 | -0.06 | -     |       |       |       |       |       |       |   |
|                 | 1.28     | -0.09                                                                                        | -0.72        | -0.35 | -0.14 | 0.33  | 0.07  | 0.27  | -0.13 | 0.37  | -0.14 | -0.08 | -0.21 | - |
|                 | 0.11     | 0.1                                                                                          | -0.68        |       |       |       |       |       |       |       |       |       |       |   |
| IMAGp998C151780 | PLEKHA2  | pleckstrin homology domain containing, family A (phosphoinositide binding specific) member 2 |              | 59339 | 0.03  | 0.31  | 0.14  |       |       |       |       |       |       |   |
|                 | 0.06     | -0.24                                                                                        | 0.07         | -0.07 | -0.56 | -0.02 | -0.23 | -0.59 | -0.34 | -0.12 | 0.1   | 0.72  |       |   |
|                 | 0.18     | 0.6                                                                                          | 0.76         |       |       |       |       |       |       |       |       |       |       |   |
| IMAGp998L11214  | PLEKHA5  | pleckstrin homology domain containing, family A member 5                                     | NM_019012    | 54477 | -0.29 | 0.36  | 0.03  | 0.28  | 0.28  | 0.14  | -0.01 | -0.32 | -     |   |
|                 | 0.37     | 0.1                                                                                          | -0.54        | -0.57 | 0.02  | -0.47 | 0.27  | 0.45  | 1.4   | 0.82  |       |       |       |   |
| IMAGp998E15188  | PLEKHM2  | pleckstrin homology domain containing, family M (with RUN domain) member 2                   |              | 23207 | 0.26  | 0.66  | 0.7   | 0.8   | 1.14  | 1.31  | -     |       |       |   |
|                 | 0.06     | 0.06                                                                                         | -0.15        | -0.05 | -0.6  | -0.23 | -0.09 | -0.01 | 0.16  | 0.27  | 1.2   | 0.75  |       |   |
| IMAGp998C14217  | PLSCR1   | phospholipid scramblase 1                                                                    |              | 5359  | -0.44 | -     |       |       |       |       |       |       |       |   |
|                 | 0.37     | -0.18                                                                                        | -0.2         | -0.32 | -0.03 | 0.25  | 0.15  | 0.48  | 0.81  | 0.1   | 0.53  | -0.16 | -0.2  |   |
|                 |          | 0.15                                                                                         | -0.02        | 0.1   | 0.38  |       |       |       |       |       |       |       |       |   |
| IMAGp998G17842  | PMP22    | peripheral myelin protein 22                                                                 | NM_153321    | 5376  | 0.65  | -     |       |       |       |       |       |       |       |   |
|                 | 0.08     | 0.34                                                                                         | 0            | 0.49  | 0.85  | 0.21  | 0.17  | -0.27 | -0.06 | 0.18  | 0.02  | 0.27  | -     |   |
|                 | 0.15     | 1.32                                                                                         | 0.97         | 0.7   | 0.86  |       |       |       |       |       |       |       |       |   |
| IMAGp998O22388  | PODXL    | podocalyxin-like                                                                             | NM_001018111 | 5420  | 0.26  | -0.64 | -     |       |       |       |       |       |       |   |
|                 | 0.06     | -0.33                                                                                        | 0.22         | 0.5   | -0.55 | -0.4  | -0.89 | -0.15 | -1.21 | -0.35 | -0.11 | -0.12 |       |   |
|                 |          | 0.32                                                                                         | 0.23         | 0.7   | 0.25  |       |       |       |       |       |       |       |       |   |
| IMAGp998A07246  | POLA     | polymerase (DNA directed), alpha                                                             |              | 5422  | -0.56 | -     |       |       |       |       |       |       |       |   |
|                 | 0.01     | -0.3                                                                                         | -0.35        | -0.78 | -0.85 | -0.03 | 0.03  | 0.14  | 0.03  | 0.82  | 0.3   | -0.19 | 0.08  | - |
|                 | 0.44     | -0.15                                                                                        | -1           | 0.16  |       |       |       |       |       |       |       |       |       |   |
| IMAGp998F201861 | POLR3GL  | polymerase (RNA) III (DNA directed) polypeptide G (32kD) like                                | NM_032305    | 84265 | -0.31 | 0.05  | -0.2  | -0.11 | -0.56 | 0.21  | 0.36  | 0.36  |       |   |
|                 | 0.46     | 0.46                                                                                         | 0.38         | 0.58  | 0.09  | -0.59 | 0.37  | 0.57  | 0.4   | -2.74 |       |       |       |   |



|                 |         |                                                              |           |        |       |           |       |       |       |       |       |       |       |       |       |       |       |       |       |       |
|-----------------|---------|--------------------------------------------------------------|-----------|--------|-------|-----------|-------|-------|-------|-------|-------|-------|-------|-------|-------|-------|-------|-------|-------|-------|
| IMAGp998B10725  | PPFIBP2 | PTPRF interacting protein, binding protein 2 (liprin beta 2) | NM_003621 | 8495   | -0.77 | 0.21      | -0.3  | 0.34  | -0.11 | 0.3   | 0.15  |       |       |       |       |       |       |       |       |       |
|                 |         |                                                              |           |        | 0.12  | 0.24      | 0.37  | 0.52  | 0.68  | -0.34 | -0.26 | -0.06 | 0.12  | -0.3  | 0.14  |       |       |       |       |       |
| IMAGp998N071907 | PPIF    | peptidylprolyl isomerase F (cyclophilin F)                   |           | 10105  | -0.74 | -0.16     | -0.77 | -0.39 | -0.26 | 0.02  | -0.4  | -0.46 | -1.04 | -0.97 | -0.9  | -     |       |       |       |       |
|                 |         |                                                              |           |        | 1.18  | -0.03     | -0.06 | 0.79  | 0.47  | 0.6   | -0.61 |       |       |       |       |       |       |       |       |       |
| IMAGp998L24526  | PRKCBP1 | protein kinase C binding protein 1                           |           |        |       |           |       |       |       |       |       |       |       |       | 23613 | -     |       |       |       |       |
|                 |         |                                                              |           |        | 0.63  | 0.27      | -0.4  | 0.19  | -0.2  | -0.2  | 0.48  | 0.28  | 0.01  | 0.29  | 0.27  | 0.01  | -0.39 |       |       |       |
|                 |         |                                                              |           |        |       | 0.05      | -0.13 | -0.11 | -0.2  | -1.96 |       |       |       |       |       |       |       |       |       |       |
| IMAGp998O191854 | PRKY    | Protein kinase, Y-linked                                     |           |        |       |           |       |       |       |       |       |       |       |       | 5616  | 0.26  | 0.23  |       |       |       |
|                 |         |                                                              |           |        |       | 0.28      | 0.21  | 0.93  | 0.61  | 0.09  | 0.06  | -0.04 | -0.25 | 0.04  | -0.2  | -0.04 | 0.17  |       |       |       |
|                 |         |                                                              |           |        |       | 0.16      | -0.09 | 0     | 0.29  |       |       |       |       |       |       |       |       |       |       |       |
| IMAGp998E14612  | PSIP1   | PC4 and SFRS1 interacting protein 1                          | NM_033222 |        |       |           |       |       |       |       |       |       |       |       |       |       | 11168 | -     |       |       |
|                 |         |                                                              |           |        | 0.48  | 0.01      | -0.45 | -0.44 | -0.29 | -0.12 | 0.51  | 0.45  | 0.48  | 0.5   | 0.61  | 1.07  | -0.19 | -     |       |       |
|                 |         |                                                              |           |        |       | 0.22      | 0.17  | 0.44  | 1.3   | -0.17 |       |       |       |       |       |       |       |       |       |       |
| IMAGp998A18791  | PUM1    | pumilio homolog 1 (Drosophila)                               |           |        |       |           |       |       |       |       |       |       |       |       |       |       | 9698  | 0.25  |       |       |
|                 |         |                                                              |           |        |       | 0.16      | 0.28  | 0.35  | 1.07  | 0.43  | 0.11  | -0.13 | -0.35 | -0.46 | -0.46 | -0.09 | 0.1   |       |       |       |
|                 |         |                                                              |           |        |       | 0.09      | 1.95  | 1.7   | 1.3   | 1.23  |       |       |       |       |       |       |       |       |       |       |
| IMAGp998K10518  | PXN     | paxillin                                                     | NM_002859 | 5829   | -0.17 | -0.05     | 0.01  | -0.26 |       |       |       |       |       |       |       |       |       |       |       |       |
|                 |         |                                                              |           |        |       | 0.72      | 0.4   | -0.11 | -0.01 | -0.42 | -0.48 | -0.87 | -0.71 | -0.21 | 0.39  | 0.32  | 0.18  |       |       |       |
|                 |         |                                                              |           |        |       | 0.1       | 0.15  |       |       |       |       |       |       |       |       |       |       |       |       |       |
| IMAGp998L0986   | QKI     | quaking homolog, KH domain RNA binding (mouse)               |           |        |       |           |       |       |       |       |       |       |       |       |       |       |       |       |       |       |
|                 |         |                                                              |           |        |       | NM_006775 | 9444  | 0.1   | 0.44  | 0.03  | 0.6   | 1.44  | 0.13  | -0.25 | 0.14  | -0.26 |       |       |       |       |
|                 |         |                                                              |           |        |       |           |       | 0.01  | -0.49 | -0.11 | -0.18 | -0.18 | 0.85  | 1.25  | 1.4   | 2.21  |       |       |       |       |
| IMAGp998A19163  | RAB6IP2 | RAB6 interacting protein 2                                   |           |        |       |           |       |       |       |       |       |       |       |       |       |       | 23085 | 1.21  |       |       |
|                 |         |                                                              |           |        |       |           | 0.82  | 0.18  | -0.02 | 1.18  | 0.22  | -0.27 | -0.04 | -0.69 | -0.01 | -1.26 | -0.03 | 0.28  |       |       |
|                 |         |                                                              |           |        |       |           | 0.1   | -0.04 | 0.57  | 1.3   | 1.02  |       |       |       |       |       |       |       |       |       |
| IMAGp998L052333 | RABGEF1 | RAB guanine nucleotide exchange factor (GEF) 1               |           |        |       |           |       |       |       |       |       |       |       |       |       |       |       |       |       |       |
|                 |         |                                                              |           |        |       | NM_014504 | 27342 | -0.31 | 0.28  | -0.06 | -0.08 | 0.42  | 0.27  | -0.11 | -0.2  | -0.25 | -     |       |       |       |
|                 |         |                                                              |           |        |       |           |       | 0.13  | -0.4  | -0.12 | -0.05 | 0.49  | 0.55  | 0.12  | 0.7   | 0.01  |       |       |       |       |
| IMAGp998G092332 | RDX     | radixin                                                      |           |        |       |           |       |       |       |       |       |       |       |       |       |       |       |       |       |       |
|                 |         |                                                              |           |        |       |           | 0.15  | 0     | -0.44 | -0.2  | -0.29 | -0.12 | -0.31 | 0.17  | -0.11 | 0.73  | 0.45  | 0.5   |       |       |
|                 |         |                                                              |           |        |       |           | 0.69  |       |       |       |       |       |       |       |       |       |       |       |       |       |
| IMAGp998C18473  | REV3L   | REV3-like, catalytic subunit of DNA polymerase zeta (yeast)  |           |        |       |           |       |       |       |       |       |       |       |       |       |       |       |       |       |       |
|                 |         |                                                              |           |        |       |           | 5980  | 0.23  | 0.59  | 0.45  | 0.48  | 0.78  | 0.51  | -0.01 | 0.06  | -0.05 |       |       |       |       |
|                 |         |                                                              |           |        |       |           |       | 0.17  | -0.12 | -0.1  | 0.09  | -0.07 | -0.11 | -0.03 | 0.8   | 0.53  |       |       |       |       |
| IMAGp998P17514  | RFP     | ret finger protein                                           |           |        |       |           |       |       |       |       |       |       |       |       |       |       |       |       |       |       |
|                 |         |                                                              |           |        |       |           |       | 0.06  | 0.08  | -0.06 | 0.19  | -0.27 | -0.16 | -0.58 | -0.42 | -0.83 | -0.27 | 0.15  | -0.24 | 0.36  |
|                 |         |                                                              |           |        |       |           |       |       | 0.32  | 0.4   | -0.23 |       |       |       |       |       |       |       |       |       |
| IMAGp998G05786  | RHOB    | ras homolog gene family, member B                            | NM_004040 | 388    |       |           |       |       |       |       |       |       |       |       |       |       |       |       |       |       |
|                 |         |                                                              |           |        |       |           |       | 0.06  | 1.68  | 1.21  | 0.64  | 0.86  | 1.32  | -0.29 | -0.51 | -0.13 | -0.19 | -0.67 | 0.23  | -     |
|                 |         |                                                              |           |        |       |           |       | 0.27  | 0.32  | 0.24  | -0.08 | 0.1   | 0.23  |       |       |       |       |       |       |       |
| IMAGp998J134543 | RLN3R1  | relaxin 3 receptor 1                                         |           |        |       |           |       |       |       |       |       |       |       |       |       |       |       |       |       |       |
|                 |         |                                                              |           |        |       |           |       | 0.32  | 0.36  | -0.52 | 0.11  | 0.49  | 0.29  | 0.37  | 0.28  | 0.83  | 0.53  | 0.14  | 0.13  | 0.08  |
|                 |         |                                                              |           |        |       |           |       |       | 0.5   | -0.4  | -0.11 |       |       |       |       |       |       |       |       |       |
| IMAGp998E21692  | RNF167  | ring finger protein 167                                      |           |        |       |           |       |       |       |       |       |       |       |       |       |       |       |       |       |       |
|                 |         |                                                              |           |        |       |           |       | 0.38  | 0.25  | -0.42 | -0.69 | -0.1  | 0.26  | 0.35  | 0.56  | 1.24  | 0.98  | -0.21 | -0.13 | -0.24 |
|                 |         |                                                              |           |        |       |           |       |       | 0.1   | -0.2  | -0.35 |       |       |       |       |       |       |       |       |       |
| IMAGp998F05119  | RNF4    | ring finger protein 4                                        | NM_002938 | 6047   | -0.2  | -0.3      | -     |       |       |       |       |       |       |       |       |       |       |       |       |       |
|                 |         |                                                              |           |        |       |           |       | 0.11  | -0.4  | -0.06 | 0     | -0.3  | -0.63 | -0.48 | -0.51 | -0.88 | -0.23 | -0.17 | -0.06 | 0.09  |
|                 |         |                                                              |           |        |       |           |       |       | 0.02  | 0     | 1.27  |       |       |       |       |       |       |       |       |       |
| IMAGp998J24820  | RPA3    | replication protein A3, 14kDa                                |           |        |       |           |       |       |       |       |       |       |       |       |       |       |       |       |       |       |
|                 |         |                                                              |           |        |       |           |       | 0.15  | -0.14 | 0.42  | -0.06 | 0.74  | 0.15  | 1.02  | 0.44  | 1.28  | 1.18  | 0.46  | -0.25 |       |
|                 |         |                                                              |           |        |       |           |       |       | 0.79  | 0.16  | -0.5  | 0.25  |       |       |       |       |       |       |       |       |
| IMAGp998I09694  | RPL22L1 | ribosomal protein L22 like 1                                 | XM_114317 | 200916 |       |           |       |       |       |       |       |       |       |       |       |       |       |       |       |       |
|                 |         |                                                              |           |        |       |           |       |       | -0.61 | -0.42 | -0.86 | -0.67 | -0.48 | -1.44 | 0.2   | 0.12  | 0.31  | 0.22  | 1.17  | 1.26  |
|                 |         |                                                              |           |        |       |           |       |       | 0.26  | -0.28 | 0.69  | 0.56  | -0.3  | -0.65 |       |       |       |       |       |       |



|                 |         |                                              |           |       |       |       |
|-----------------|---------|----------------------------------------------|-----------|-------|-------|-------|
| IMAGp998N2195   | STAMBP  | STAM binding protein                         | 10617     | -0.52 | -0.27 | -     |
| 0.68            | -0.14   | -0.11                                        | -0.07     | 0.08  | -0.01 | 0.15  |
| 0.34            | -1      | -0.32                                        | -0.13     | 0.14  | -0.14 | 0.16  |
|                 |         |                                              |           |       |       | -0.33 |
| IMAGp998H14626  | STK38L  | serine/threonine kinase 38 like              | NM_015000 |       |       |       |
| 23012           | 0.13    | 0.14                                         | 0.07      | 0.46  | 0.55  | 0.66  |
| 0.5             | 0.03    | -0.21                                        | 0.58      | 0.49  | -0.6  | 0.11  |
| IMAGp998C221203 | SUI1    | putative translation initiation factor       | NM_005801 |       |       |       |
| 10209           | 1.22    | 0.17                                         | 1.24      | 0.46  | 1.01  | 0.84  |
| 1.5             | -0.12   | 0.02                                         | 1.32      | 0.94  | 0.7   | 1.21  |
| IMAGp998P151965 | TBX15   | T-box 15                                     | NM_152380 | 6913  | -0.91 | -0.41 |
| 0.72            | -1.12   | 0.4                                          | 0.47      | 0.23  | 0.15  | 0.97  |
|                 | 0.38    |                                              |           |       | 0.65  | -0.18 |
|                 |         |                                              |           |       | -0.03 | 0.2   |
|                 |         |                                              |           |       | 0.39  | -0.8  |
| IMAGp998A221154 | TBX2    | T-box 2                                      | NM_005994 | 6909  | 0.32  | -0.03 |
| 0.82            | -0.76   | -0.48                                        | -0.36     | -0.58 | -0.3  | -1.01 |
| 0.2             | 0.26    |                                              |           |       | -0.31 | -0.04 |
|                 |         |                                              |           |       | -0.47 | 0.13  |
|                 |         |                                              |           |       | 0.41  | -     |
| IMAGp998G08415  | TENC1   | tensin like C1 domain containing phosphatase |           |       |       |       |
| 23371           | -0.45   | 0.13                                         | -0.69     | 0.42  | -0.05 | -0.02 |
| 0.51            | -0.22   | -0.09                                        | -0.42     | -0.88 | 0.1   | -0.47 |
| IMAGp998I01193  | TMSB10  | thymosin, beta 10                            | NM_021103 | 9168  | 0.08  | 0.61  |
| 0.36            | 0.63    | 0.16                                         | 0.96      | -0.36 | 0.13  | -0.35 |
|                 | 0.54    | 1.5                                          | 0.3       |       | -0.15 | -0.43 |
|                 |         |                                              |           |       | -0.13 | 0.16  |
|                 |         |                                              |           |       | -0.4  | -0.09 |
| IMAGp998I10392  | TOP1    | topoisomerase (DNA) I                        | 7150      | 0.13  | 0.55  | 0     |
| 0.13            | 0.3     | 0.15                                         | -0.43     | 0.15  | -0.41 | -0.3  |
| 0.07            | 0.7     | 1.65                                         |           |       | -0.06 | 0.04  |
|                 |         |                                              |           |       | -0.14 | 0.06  |
|                 |         |                                              |           |       | 0.16  |       |
| IMAGp998D231008 | TRAPPC3 | trafficking protein particle complex 3       |           |       |       |       |
| 27095           | 0.13    | -0.18                                        | -0.13     | 0.24  | -0.1  | 0.33  |
| 0.19            | -0.01   | -0.25                                        | 0.54      | 0.56  | 0.4   | 0.21  |
| IMAGp998J10193  | TTYH3   | tweety homolog 3 (Drosophila)                | NM_025250 | 80727 | 0.3   |       |
| 0.09            | 0.29    | -0.26                                        | 0.89      | 0.55  | 0.04  | -0.24 |
| 0.05            | 0.43    | 0.26                                         | 0.4       | 0.09  | -0.24 | -0.39 |
|                 |         |                                              |           |       | 0     | -0.56 |
|                 |         |                                              |           |       | -0.42 | -0.17 |
| IMAGp998C14658  | UGCG    | UDP-glucose ceramide glucosyltransferase     | 7357      |       |       |       |
| 0.37            | -0.35   | -0.56                                        | -0.34     | 0.19  | -0.49 | 0.6   |
|                 | 0.15    | 0.62                                         | 0.33      | -0.6  | -0.11 | 0.3   |
|                 |         |                                              |           |       | 0.77  | 0.43  |
|                 |         |                                              |           |       | 0.9   | 1.01  |
|                 |         |                                              |           |       |       | -0.12 |
| IMAGp998J24653  | UNG     | uracil-DNA glycosylase                       | 7374      | -0.32 | -0.15 | 1.07  |
| 0.07            | 0.03    | 0.38                                         | 1.18      | 0.67  | 0.42  | 0.26  |
| 0.8             | -0.56   |                                              |           |       | 0.54  | 0.89  |
|                 |         |                                              |           |       | -0.4  | 0.2   |
|                 |         |                                              |           |       | -0.02 | -0.28 |
| IMAGp998I22699  | VPS39   | vacuolar protein sorting 39 (yeast)          | NM_015289 | 23339 |       |       |
| 0.39            | 0.45    | -0.42                                        | 0.12      | -0.08 | 0.4   | -0.13 |
| 0.29            | -0.03   | -0.25                                        | -0.5      | -0.53 | 0.39  | 0.35  |
|                 |         |                                              |           |       | 0.68  | 0.48  |
|                 |         |                                              |           |       | 0.68  | 0.68  |
|                 |         |                                              |           |       |       | -0.58 |
| IMAGp998M13839  | YRDC    | ischemia/reperfusion inducible protein       | NM_024640 |       |       |       |
| 79693           | -0.04   | 0.07                                         | -0.13     | 0.09  | 0.1   | 0.02  |
| 0.25            | -0.1    | 0.05                                         | 0.35      | 0.16  | 0.1   | -0.27 |
|                 |         |                                              |           |       |       |       |
| IMAGp998I07527  | ZCCHC2  | zinc finger, CCHC domain containing 2        |           |       |       |       |
| NM_017742       | 54877   | -0.22                                        | 0.21      | 0.11  | 0.29  | -0.27 |
| 0.06            | -0.5    | -0.16                                        | -0.18     | 0.15  | -0.17 | 0.2   |
|                 |         |                                              |           |       | 0.7   | 0.27  |
| IMAGp998H08628  | ZDHHC2  | zinc finger, DHHC domain containing 2        |           |       |       |       |
| NM_016353       | 51201   | -0.42                                        | -0.08     | -0.37 | -0.92 | 0.05  |
| 0.23            | 0.6     | 0.23                                         | 0.22      | -0.79 | -0.18 | -0.37 |
|                 |         |                                              |           |       | 0.8   | -0.5  |
| IMAGp998G18725  | ZNF18   | zinc finger protein 18 (KOX 11)              | NM_144680 | 7566  |       |       |
| 0.07            | -0.27   | -0.02                                        | 0.2       | 0.21  | 0.39  | 0.4   |
| 0.32            | 0.27    | -0.37                                        | 0         | -0.01 | 0.28  | 0.32  |
|                 |         |                                              |           |       | 0.23  | 0.35  |
|                 |         |                                              |           |       | 0.78  | 0.1   |
| IMAGp998G10252  | ZNF185  | zinc finger protein 185 (LIM domain)         |           |       |       |       |
| NM_007150       | 7739    | -0.52                                        | -0.52     | -0.69 | -0.45 | -0.52 |
| 0.63            | 0.53    | 0.48                                         | 0.17      | -0.01 | 0.32  | -0.01 |
|                 |         |                                              |           |       | 0.4   | -1.14 |
| IMAGp998F05835  | ZNF262  | zinc finger protein 262                      | 9202      | 0.09  | 0.47  |       |
| 0.67            | 0.39    | 0.47                                         | 1.15      | 0.17  | -0.06 | -0.21 |
| 0.4             | 0.08    | 1.2                                          | 0.81      |       | -0.28 | -0.65 |
|                 |         |                                              |           |       | -0.26 | -0.15 |
|                 |         |                                              |           |       | 0.11  |       |

|                 |         |                                               |      |       |      |       |      |       |       |       |   |
|-----------------|---------|-----------------------------------------------|------|-------|------|-------|------|-------|-------|-------|---|
| IMAGp998E201726 | ZNFN1A1 | zinc finger protein, subfamily 1A, 1 (Ikaros) |      |       |      |       |      |       |       |       |   |
| NM_006060       | 10320   | 0.46                                          | 0.03 | 0.14  | 0.12 | 0.1   | 0.23 | -0.32 | -0.31 | -0.14 | - |
| 2.11            | -0.55   | -0.37                                         | 0.01 | -0.05 | 0.2  | -0.09 | -0.2 | 0.17  |       |       |   |
